# Supplementary material for: Will you swim into my parlour? In situ observations of Atlantic cod (Gadus morhua) interactions with baited pots, with implications for gear design
Source: PeerJ. 2017 Feb 8;5:e2953. doi: 10.7717/peerj.2953 (PMC5301977; doi:10.7717/peerj.2953)
Supplement: Data S1 [file peerj-05-2953-s001.xlsx]

## Sheet: Camera pot deploynment data
CamPotID	PotType	LatDegIn	LatMinSecIn	LongDeg	LongMinSec	TimeIn	DateIn	SeaStateIn	CloudIn	PrecipIn	DepthIn	LatDegOut	LatMinSecOut	LongDegOut	LongMinSecOut	TimeOut	DateOut	SeaStateOut	CloudOut	PrecipOut	DepthOut	FileNames	Notes
1	Nor	49	36.69	54	5.76	15:15:00	19/08/2015	1	5	0	24.1	49	36.69	54	5.75	08:46:28	20/08/2015	1	1	0	23.8
2	Nor	49	36.58	54	5.75	10:34:28	20/08/2015	1	1	0	24.6	49	36.57	54	5.74	12:15:13	21/08/2015	1	1	0	25.2
3	Nor	49	37.18	54	6.3	15:47:00	21/08/2015	1	1	0	15.5	49	37.22	54	6.25	12:51:27	22/08/2015	1	1	0	17
4	Nor	49	38.2	54	2.23	14:46:30	22/08/2015	1	1	0	16	49	38.21	54	2.21	12:54:10	23/08/2015	0	5	0	16.3
5	Nor	49	38.08	54	1.97	14:48:06	23/08/2015	0	3	0	18.6	49	38.1	54	1.97	10:50:43	26/08/2015	1	3	0	17.4
6	Nor	49	36.89	54	2.04	16:12:37	26/08/2015	0	0	0	20	49	36.92	54	2	12:05:35	27/08/2015	1	2	0	16.3
7	NL	49	36.9	54	2.01	12:39:30	29/08/2015	0	3	0	20	49	36.92	54	1.97	14:17:51	30/08/2015	0	4	0	19.8
8	NL	49	37.32	54	1.83	16:32:47	30/08/2015	0	4	0	22.3	49	37.3	54	1.81	09:08:00	31/08/2015	0	fog	0	22.8
9	NL	49	36.84	54	2.65	10:23:00	31/08/2015	0	5	0	29	49	36.87	54	2.67	08:40:32	2015-01-09	1	4	0	28.7
10	NL	49	37.15	54	3.77	10:17:38	2015-01-09	1	5	0	26.9	49	37.2	54	3.75	07:16:37	2015-03-09	0	3	0	27

## Sheet: Camera Pot Catch
CamPotID	Species	Length	Count	PhotoID
1	Cod	62	1
1	Cod	77	1
1	Cod	64	1
1	Cod	63	1
1	Cod	50	1
1	Cod	53	1
1	Cod	62	1
1	Cod	61	1
1	Cod	39	1
1	Cod	54	1
1	Cod	50	1
1	Cod	70	1
1	Cod	56	1
1	Cod	43	1
1	Cod	49	1
1	Cod	52	1
1	Cod	44	1
1	Cod	46	1
1	Cod	58	1
1	Cod	42	1
1	Cod	37	1
1	Cod	60	1
1	Cod	59	1
1	Cod	55	1
1	Cod	38	1
1	Cod	68	1
1	Cod	45	1
1	Cod	59	1
1	Cod	48	1
1	Cod	40	1
1	Cod	34	1
1	Toad Crab		42
2	Cod	68	1
2	Cod	61	1
2	Cod	51	1
2	Cod	67	1
2	Cod	54	1
2	Cod	42	1
2	Cod	55	1
2	Cod	64	1
2	Cod	45	1
2	Cod	59	1
2	Cod	58	1
2	Cod	44	1
2	Cod	49	1
2	Cod	58	1
2	Cod	49	1
2	Toad Crab		9
3	Cod	63	1
3	Cod	62	1
3	Cod	56	1
3	Cod	50	1
3	Cod	49	1
3	Cod	38	1
3	Cod	36	1
3	Cod	35	1
3	Cod	51	1
3	Toad Crab		17
3	Rock Crab		1
4	Cod	42	1
4	Cod	34	1
4	Cod	44	1
4	Cod	46	1
4	Cod	46	1
4	Cod	39	1
4	Cod	37	1
4	Cod	39	1
4	Cod	44	1
4	Cod	40	1
4	Cod	49	1
4	Cod	38	1
4	Cod	36	1
4	Cod	42	1
4	Cod	48	1
4	Cod	42	1
4	Cod	48	1
4	Cod	42	1
4	Cod	39	1
4	Cod	65	1
4	Cod	39	1
4	Cod	34	1
4	Cod	40	1
4	Cod	38	1
4	Cod	37	1
4	Cod	40	1
4	Cod	38	1
4	Cod	38	1
4	Cod	55	1
4	Cod	36	1
4	Cod	42	1
4	Cod	44	1
4	Cod	40	1
4	Cod	56	1
4	Cod	61	1
4	Cod	48	1
4	Cod	56	1
4	Cod	63	1
4	Cod	73	1
4	Cod	48	1
4	Cod	52	1
4	Cod	60	1
4	Cod	58	1
4	Cod	37	1
4	Cod	60	1
4	Cod	50	1
4	Cod	58	1
4	Cod	54	1
4	Toad Crab		15
4	Rock Cod	54	1
5	Toad Crab		9
5	Cod	39	1
5	Cod	59	1
5	Cod	56	1
5	Cod	65	1
5	Cod	56	1
5	Cod	48	1
5	Cod	50	1
5	Cod	45	1
5	Cod	65	1
5	Cod	61	1
5	Cod	62	1
5	Cod	69	1
5	Cod	76	1
5	Cod	50	1
5	Cod	62	1
5	Cod	69	1
5	Cod	76	1
5	Cod	50	1
5	Cod	62	1
5	Cod	55	1
5	Cod	70	1
5	Cod	65	1
5	Cod	61	1
5	Cod	75	1
5	Cod	49	1
5	Cod	60	1
5	Cod	46	1
6	Toad Crab		6
6	Cod	49	1
6	Cod	76	1
6	Cod	57	1
6	Cod	54	1
6	Cod	71	1
6	Cod	62	1
6	Cod	48	1
6	Cod	62	1
6	Cod	57	1
6	Cod	62	1
6	Cod	66	1
6	Cod	57	1
6	Cod	65	1
6	Cod	57	1
6	Cod	53	1
6	Cod	60	1
6	Cod	61	1
6	Cod	61	1
6	Cod	51	1
6	Cod	55	1
6	Cod	41	1
6	Cod	55	1
6	Cod	61	1
6	Cod	67	1
6	Cod	75	1
6	Cod	61	1
6	Cod	67	1
6	Cod	57	1
6	Cod	58	1
6	Cod	56	1
6	Cod	58	1
6	Cod	52	1
6	Cod	50	1
6	Cod	55	1
7	Cod	39	1
7	Cod	40	1
7	Cod	50	1
7	Cod	49	1
7	Cod	74	1
7	Cod	60	1
8	Cod	60	1
9	Cod	42	1
9	Cod	64	1
9	Cod	56	1
9	Toad Crab		4
10	Toad Crab		3
10	Cod	44	1
10	Cod	51	1
10	Cod	73	1
10	Cod	54	1
10	Cod	59	1
10	Cod	55	1
10	Cod	61	1

## Sheet: Camera Pot Metadata
Cod potting Fogo Island August/Sept 2015 Field Season
Metadata
This is the dataset for the RDC Ignite cod potting project on Fogo Island
Field crew: Brett Favaro (week 1 only), Phillip Meintzer, Philip Walsh
Camera Pot Deployment Data
Variable Name	Description	Possible values (if blank, it's obvious)
CamPotID	ID # of the camera deployment	Numbers from 1 to total number of deplooyments
PotType	Pot type	NOR or NFLD
LatDeg	Latitude (Degrees) where camera pot was deployed
LatMinSec	Latitude (Minutes.seconds) where cam pot was deployed
LongDeg	Longitude ""
LongMinSec	Longitude ""
TimeIn	Time camera was deployed
DateIn	Date camera was deployed
SeaStateIn	Sea state when camera was deployed	one to five, five being hell
CloudIn	Cloud cover measured in Otkas	One (clear) to seven (completely overcast)
PrecipIn	Precipitation when pot was in water	0 (no rain) to 3 (torrential downpour)
DepthIn	Depth that the pot was initially set	Depth in meters
LatDegOut	Everything from here on is the same as above but for when the pot was retrieved
LatMinSecOut
LongDegOut
LongMinSecOut
TimeOut
DateOut
SeaStateOut
CloudOut
WeatherOut
DepthOut
FileNames	Once downloaded make all the files identifiable
Notes	Any notes you might take
Camera Pot Catch
CamPotID	ID # of the camera deployment	This must correspond with the ID number in the above section
Species	Species ID	Name of the species
Length	Total length of fish in cm	cm
Count	Number of individuals of a given species	Use this for species other than fish
PhotoId

## Sheet: Video
date	time	elapsed	counter	campotid	file	waterdir	species	approach	1	2	3	4	5	6	7	8	attempt	L/U	R/D	success	fail	exit
19/08/2015	15:15:00	0	0:00:00	1	29																	0	Start
19/08/2015	15:15:30	30	0:30:00	1	29	6	cod	0	0	0	0	0	0	0	0	0	0	0	0	0	0	0
19/08/2015	15:16:00	60	1:00:00	1	29	6	cod	0	0	0	0	0	0	0	0	0	0	0	0	0	0	0
19/08/2015	15:16:30	90	1:30:00	1	29	6	cod	0	0	0	0	0	0	0	0	0	0	0	0	0	0	0
19/08/2015	15:17:00	120	2:00:00	1	29	6	cod	0	0	0	0	0	0	0	0	0	0	0	0	0	0	0
19/08/2015	15:17:30	150	2:30:00	1	29	6	cod	1	0	0	0	0	1	0	0	0	1	0	1	0	1	0
19/08/2015	15:18:00	180	3:00:00	1	29	6	cod	0	0	0	0	0	0	0	0	0	0	0	0	0	0	0
19/08/2015	15:18:30	210	3:30:00	1	29	6	cod	0	0	0	0	0	0	0	0	0	0	0	0	0	0	0
19/08/2015	15:19:00	240	4:00:00	1	29	6	cod	0	0	0	0	0	0	0	0	0	0	0	0	0	0	0
19/08/2015	15:19:30	270	4:30:00	1	29	6	cod	0	0	0	0	0	0	0	0	0	0	0	0	0	0	0
19/08/2015	15:20:00	300	5:00:00	1	29	6	cod	0	0	0	0	0	0	0	0	0	0	0	0	0	0	0
19/08/2015	15:20:30	330	5:30:00	1	29	6	cod	0	0	0	0	0	0	0	0	0	0	0	0	0	0	0
19/08/2015	15:21:00	360	6:00:00	1	29	6	cod	0	0	0	0	0	0	0	0	0	0	0	0	0	0	0
19/08/2015	15:21:30	390	6:30:00	1	29	6	cod	0	0	0	0	0	0	0	0	0	0	0	0	0	0	0
19/08/2015	15:22:00	420	7:00:00	1	29	6	cod	0	0	0	0	0	0	0	0	0	0	0	0	0	0	0
19/08/2015	15:22:30	450	7:30:00	1	29	6	cod	0	0	0	0	0	0	0	0	0	0	0	0	0	0	0
19/08/2015	15:23:00	480	8:00:00	1	29	6	cod	0	0	0	0	0	0	0	0	0	0	0	0	0	0	0
19/08/2015	15:23:30	510	8:30:00	1	29	6	cod	0	0	0	0	0	0	0	0	0	0	0	0	0	0	0
19/08/2015	15:24:00	540	9:00:00	1	29	6	cod	0	0	0	0	0	0	0	0	0	0	0	0	0	0	0
19/08/2015	15:24:30	570	9:30:00	1	29	6	cod	0	0	0	0	0	0	0	0	0	0	0	0	0	0	0
19/08/2015	15:25:00	600	10:00:00	1	29	6	cod	0	0	0	0	0	0	0	0	0	0	0	0	0	0	0
19/08/2015	15:25:30	630	10:30:00	1	29	6	cod	0	0	0	0	0	0	0	0	0	0	0	0	0	0	0
19/08/2015	15:26:00	660	11:00:00	1	29	6	cod	0	0	0	0	0	0	0	0	0	0	0	0	0	0	0
19/08/2015	15:26:30	690	11:30:00	1	29	6	cod	0	0	0	0	0	0	0	0	0	0	0	0	0	0	0
19/08/2015	15:27:00	720	12:00:00	1	29	6	cod	0	0	0	0	0	0	0	0	0	0	0	0	0	0	0
19/08/2015	15:27:30	750	12:30:00	1	29	6	cod	0	0	0	0	0	0	0	0	0	0	0	0	0	0	0
19/08/2015	15:28:00	780	13:00:00	1	29	6	cod	0	0	0	0	0	0	0	0	0	0	0	0	0	0	0
19/08/2015	15:28:30	810	13:30:00	1	29	6	cod	0	0	0	0	0	0	0	0	0	0	0	0	0	0	0
19/08/2015	15:29:00	840	14:00:00	1	29	6	cod	0	0	0	0	0	0	0	0	0	0	0	0	0	0	0
19/08/2015	15:29:30	870	14:30:00	1	29	6	cod	0	0	0	0	0	0	0	0	0	0	0	0	0	0	0
19/08/2015	15:30:00	900	15:00:00	1	29	6	cod	0	0	0	0	0	0	0	0	0	0	0	0	0	0	0
19/08/2015	15:30:30	930	15:30:00	1	29	6	cod	0	0	0	0	0	0	0	0	0	0	0	0	0	0	0
19/08/2015	15:31:00	960	16:00:00	1	29	6	cod	3	0	1	2	0	0	0	0	0	0	0	0	0	0	0
19/08/2015	15:31:30	990	16:30:00	1	29	6	cod	3	0	3	0	0	0	0	0	0	0	0	0	0	0	0
19/08/2015	15:32:00	1020	17:00:00	1	29	6	cod	1	0	0	0	0	0	1	0	0	0	0	0	0	0	0
19/08/2015	15:32:30	1050	17:30:00	1	29	6	cod	0	0	0	0	0	0	0	0	0	0	0	0	0	0	0
19/08/2015	15:33:00	1080	18:00:00	1	29	6	cod	3	0	1	0	0	2	0	0	0	1	0	1	0	0	0
19/08/2015	15:33:30	1110	18:30:00	1	29	6	cod	0	0	0	0	0	0	0	0	0	0	0	0	0	1	0
19/08/2015	15:34:00	1140	19:00:00	1	29	6	cod	1	0	0	0	0	1	0	0	0	0	0	0	0	0	0
19/08/2015	15:34:30	1170	19:30:00	1	29	6	cod	0	0	0	0	0	0	0	0	0	0	0	0	0	0	0
19/08/2015	15:35:00	1200	20:00:00	1	29	6	cod	0	0	0	0	0	0	0	0	0	1	0	1	0	1	0
19/08/2015	15:35:30	1230	20:30:00	1	29	6	cod	0	0	0	0	0	0	0	0	0	0	0	0	0	0	0
19/08/2015	15:36:00	1260	21:00:00	1	29	6	cod	2	0	0	0	1	1	0	0	0	0	0	0	0	0	0
19/08/2015	15:36:30	1290	21:30:00	1	29	6	cod	0	0	0	0	0	0	0	0	0	0	0	0	0	0	0
19/08/2015	15:37:00	1320	22:00:00	1	29	6	cod	1	0	0	0	0	1	0	0	0	0	0	0	0	0	0
19/08/2015	15:37:30	1350	22:30:00	1	29	6	cod	0	0	0	0	0	0	0	0	0	2	0	2	0	1	0
19/08/2015	15:38:00	1380	23:00:00	1	29	6	cod	0	0	0	0	0	0	0	0	0	0	0	0	0	1	0
19/08/2015	15:38:30	1410	23:30:00	1	29	6	cod	0	0	0	0	0	0	0	0	0	1	0	1	0	0	0
19/08/2015	15:39:00	1440	1 day, 0:00:00	1	29	6	cod	0	0	0	0	0	0	0	0	0	0	0	0	0	1	0
19/08/2015	15:39:30	1470	1 day, 0:30:00	1	29	6	cod	0	0	0	0	0	0	0	0	0	0	0	0	0	0	0
19/08/2015	15:40:00	1500	1 day, 1:00:00	1	29	6	cod	0	0	0	0	0	0	0	0	0	0	0	0	0	0	0
19/08/2015	15:40:30	1530	1 day, 1:30:00	1	29	6	cod	0	0	0	0	0	0	0	0	0	1	0	1	1	0	0
19/08/2015	15:41:00	1560	1 day, 2:00:00	1	29	6	cod	0	0	0	0	0	0	0	0	0	0	0	0	0	0	0
19/08/2015	15:41:30	1590	1 day, 2:30:00	1	29	6	cod	0	0	0	0	0	0	0	0	0	0	0	0	0	0	0
19/08/2015	15:42:00	1620	1 day, 3:00:00	1	29	6	cod	0	0	0	0	0	0	0	0	0	0	0	0	0	0	0
19/08/2015	15:42:30	1650	1 day, 3:30:00	1	29	6	cod	0	0	0	0	0	0	0	0	0	0	0	0	0	0	0
19/08/2015	15:43:00	1680	1 day, 4:00:00	1	29	6	cod	0	0	0	0	0	0	0	0	0	0	0	0	0	0	0
19/08/2015	15:43:30	1710	1 day, 4:30:00	1	29	6	cod	0	0	0	0	0	0	0	0	0	0	0	0	0	0	0
19/08/2015	15:44:00	1740	1 day, 5:00:00	1	29	6	cod	0	0	0	0	0	0	0	0	0	0	0	0	0	0	0
19/08/2015	15:44:30	1770	1 day, 5:30:00	1	29	6	cod	0	0	0	0	0	0	0	0	0	0	0	0	0	0	0
19/08/2015	15:45:00	1800	1 day, 6:00:00	1	29	6	cod	0	0	0	0	0	0	0	0	0	0	0	0	0	0	0
19/08/2015	15:46:00	1860	1:00:00	1	30	6	cod	0	0	0	0	0	0	0	0	0	0	0	0	0	0	0
19/08/2015	15:47:00	1920	2:00:00	1	30	6	cod	2	0	0	0	0	0	1	1	0	0	0	0	0	0	0
19/08/2015	15:48:00	1980	3:00:00	1	30	6	cod	0	0	0	0	0	0	0	0	0	0	0	0	0	0	0
19/08/2015	15:49:00	2040	4:00:00	1	30	6	cod	1	0	1	0	0	0	0	0	0	0	0	0	0	0	0
19/08/2015	15:50:00	2100	5:00:00	1	30	6	cod	1	0	0	0	0	1	0	0	0	0	0	0	0	0	0
19/08/2015	15:51:00	2160	6:00:00	1	30	6	cod	0	0	0	0	0	0	0	0	0	0	0	0	0	0	0
19/08/2015	15:52:00	2220	7:00:00	1	30	6	cod	2	0	0	0	0	0	1	0	1	0	0	0	0	0	0
19/08/2015	15:53:00	2280	8:00:00	1	30	6	cod	1	0	0	0	0	0	1	0	0	0	0	0	0	0	0
19/08/2015	15:54:00	2340	9:00:00	1	30	6	cod	3	0	0	0	0	0	0	2	1	0	0	0	0	0	0
19/08/2015	15:55:00	2400	10:00:00	1	30	6	cod	0	0	0	0	0	0	0	0	0	1	0	1	0	1	0
19/08/2015	15:56:00	2460	11:00:00	1	30	6	tc	1	0	0	0	0	0	0	1	0	0	0	0	0	0	0
19/08/2015	15:56:00	2460	11:00:00	1	30	6	cod	2	0	0	0	0	0	0	2	0	0	0	0	0	0	0
19/08/2015	15:57:00	2520	12:00:00	1	30	6	cod	1	0	0	0	0	0	0	0	0	1	1	0	0	0	0
19/08/2015	15:58:00	2580	13:00:00	1	30	6	cod	2	0	0	0	0	0	1	1	0	0	0	0	0	1	0
19/08/2015	15:59:00	2640	14:00:00	1	30	6	cod	1	0	0	0	0	1	0	0	0	1	1	0	0	1	0
19/08/2015	16:00:00	2700	15:00:00	1	30	6	cod	1	0	0	0	0	0	1	0	0	0	0	0	0	0	0
19/08/2015	16:01:00	2760	16:00:00	1	30	6	tc	1	0	0	0	0	0	0	1	0	0	0	0	0	0	0
19/08/2015	16:01:00	2760	16:00:00	1	30	6	cod	1	0	0	0	0	0	0	0	1	0	0	0	0	0	0
19/08/2015	16:02:00	2820	17:00:00	1	30	6	cod	1	1	0	0	0	0	0	0	0	0	0	0	0	0	0
19/08/2015	16:03:00	2880	18:00:00	1	30	6	tc	1	0	0	0	0	0	0	1	0	0	0	0	0	0	0
19/08/2015	16:03:00	2880	18:00:00	1	30	6	cod	1	0	0	0	0	0	1	0	0	0	0	0	0	0	0
19/08/2015	16:04:00	2940	19:00:00	1	30	6	cod	0	0	0	0	0	0	0	0	0	0	0	0	0	0	0
19/08/2015	16:05:00	3000	20:00:00	1	30	6	cod	1	0	0	0	0	0	0	1	0	0	0	0	0	0	0
19/08/2015	16:06:00	3060	21:00:00	1	30	6	cod	0	0	0	0	0	0	0	0	0	0	0	0	0	0	0
19/08/2015	16:07:00	3120	22:00:00	1	30	6	cod	3	0	0	0	0	0	1	1	1	0	0	0	0	0	0
19/08/2015	16:08:00	3180	23:00:00	1	30	6	cod	1	0	0	0	0	0	1	0	0	0	0	0	0	0	0
19/08/2015	16:09:00	3240	1 day, 0:00:00	1	30	6	cod	2	0	0	0	1	0	0	1	0	0	0	0	0	0	0
19/08/2015	16:10:00	3300	1 day, 1:00:00	1	30	6	cod	3	0	0	0	0	0	1	1	1	0	0	0	0	0	0
19/08/2015	16:11:00	3360	1 day, 2:00:00	1	30	6	cod	1	0	0	0	0	0	0	1	0	0	0	0	0	0	0
19/08/2015	16:12:00	3420	1 day, 3:00:00	1	30	6	cod	3	0	0	0	0	0	0	3	0	0	0	0	0	0	0
19/08/2015	16:13:00	3480	1 day, 4:00:00	1	30	6	cod	0	0	0	0	0	0	0	0	0	1	1	0	0	0	0
19/08/2015	16:14:00	3540	1 day, 5:00:00	1	30	6	cod	0	0	0	0	0	0	0	0	0	0	0	0	1	0	0
19/08/2015	16:15:00	3600	1 day, 6:00:00	1	30	6	cod	1	0	0	0	0	0	0	1	0	0	0	0	0	0	0
19/08/2015	16:16:00	3660	1:00:00	1	31	6	cod	1	1	0	0	0	0	0	0	0	0	0	0	0	0	0
19/08/2015	16:17:00	3720	2:00:00	1	31	6	cod	1	0	0	0	0	0	0	0	1	0	0	0	0	0	0
19/08/2015	16:18:00	3780	3:00:00	1	31	6	tc	1	0	0	0	0	0	0	0	1	0	0	0	0	0	0
19/08/2015	16:18:00	3780	3:00:00	1	31	6	cod	1	1	0	0	0	0	0	0	0	0	0	0	0	0	0
19/08/2015	16:19:00	3840	4:00:00	1	31	6	cod	0	0	0	0	0	0	0	0	0	0	0	0	0	0	0
19/08/2015	16:19:00	3840	4:00:00	1	31	6	tc	1	0	0	0	0	0	0	1	0	0	0	0	0	0	0
19/08/2015	16:20:00	4200	5:00:00	1	31	6	tc	1	0	0	0	0	0	0	1	0	0	0	0	0	0	0
19/08/2015	16:20:00	4200	5:00:00	1	31	6	cod	0	0	0	0	0	0	0	0	0	0	0	0	0	0	0
19/08/2015	16:21:00	4260	6:00:00	1	31	6	cod	1	0	0	0	0	0	0	1	0	0	0	0	0	0	0
19/08/2015	16:22:00	4320	7:00:00	1	31	6	cod	3	0	0	0	0	0	0	3	0	0	0	0	0	0	0
19/08/2015	16:23:00	4380	8:00:00	1	31	6	cod	0	0	0	0	0	0	0	0	0	0	0	0	0	0	0
19/08/2015	16:24:00	4440	9:00:00	1	31	6	cod	5	0	1	0	0	0	2	1	1	0	0	0	0	0	0
19/08/2015	16:25:00	4500	10:00:00	1	31	6	cod	3	0	0	0	0	1	1	0	1	0	0	0	0	0	0
19/08/2015	16:26:00	4560	11:00:00	1	31	6	cod	3	0	0	0	0	0	1	1	1	0	0	0	0	0	0
19/08/2015	16:27:00	4620	12:00:00	1	31	6	cod	3	0	0	0	0	0	1	1	1	0	0	0	0	0	0
19/08/2015	16:28:00	4680	13:00:00	1	31	6	tc	1	0	0	0	0	0	0	1	0	0	0	0	0	0	0
19/08/2015	16:28:00	4680	13:00:00	1	31	6	cod	1	0	0	0	0	0	1	0	0	2	0	2	0	2	0
19/08/2015	16:29:00	4740	14:00:00	1	31	6	cod	3	0	0	0	0	1	1	0	1	1	1	0	0	1	0
19/08/2015	16:30:00	4800	15:00:00	1	31	6	tc	2	0	0	0	0	0	0	1	1	0	0	0	0	0	0
19/08/2015	16:30:00	4800	15:00:00	1	31	6	cod	4	1	0	0	0	0	1	2	0	0	0	0	0	0	0
19/08/2015	16:31:00	4860	16:00:00	1	31	6	tc	1	0	0	0	0	0	0	1	0	0	0	0	0	0	0
19/08/2015	16:31:00	4860	16:00:00	1	31	6	cod	3	1	0	0	0	0	0	1	1	0	0	0	0	0	0
19/08/2015	16:32:00	4920	17:00:00	1	31	6	cod	4	1	0	0	0	0	1	1	1	0	0	0	0	0	0
19/08/2015	16:33:00	4980	18:00:00	1	31	6	cod	3	1	0	0	0	0	0	1	1	0	0	0	0	0	0
19/08/2015	16:34:00	5040	19:00:00	1	31	6	cod	2	1	0	0	0	0	1	0	0	0	0	0	0	0	0
19/08/2015	16:35:00	5100	20:00:00	1	31	6	tc	1	0	0	0	0	0	0	1	0	0	0	0	0	0	0
19/08/2015	16:35:00	5100	20:00:00	1	31	6	cod	3	0	0	0	0	0	1		2	1	1	0	0	1	0
19/08/2015	16:36:00	5160	21:00:00	1	31	6	cod	5	0	0	0	0	0	1	3	1	0	0	0	0	0	0
19/08/2015	16:37:00	5220	22:00:00	1	31	6	tc	1	0	0	0	0	0	0	1	0	0	0	0	0	0	0
19/08/2015	16:37:00	5220	22:00:00	1	31	6	cod	3	1	0	0	0	0	0	0	2	0	0	0	0	0	0
19/08/2015	16:38:00	5280	23:00:00	1	31	6	cod	0	0	0	0	0	0	0	0	0	0	0	0	0	0	0
19/08/2015	16:39:00	5340	1 day, 0:00:00	1	31	6	tc	1	0	0	0	0	0	0	1	0	0	0	0	0	0	0
19/08/2015	16:39:00	5340	1 day, 0:00:00	1	31	6	cod	6	3	0	0	1	0	0	1	1	0	0	0	0	0	0
19/08/2015	16:40:00	5400	1 day, 1:00:00	1	31	6	cod	3	0	0	0	0	0	1	1	1	0	0	0	0	0	0
19/08/2015	16:41:00	5460	1 day, 2:00:00	1	31	6	tc	2	0	0	0	0	0	0	2	0	0	0	0	0	0	0
19/08/2015	16:41:00	5460	1 day, 2:00:00	1	31	6	cod	2	0	0	0	0	0	0	1	1	0	0	0	0	0	0
19/08/2015	16:42:00	5520	1 day, 3:00:00	1	31	6	tc	1	0	0	0	0	0	0	1	0	0	0	0	0	0	0
19/08/2015	16:42:00	5520	1 day, 3:00:00	1	31	6	cod	6	0	0	0	0	0	4	1	1	1	0	1	0	0	0
19/08/2015	16:43:00	5580	1 day, 4:00:00	1	31	6	cod	11	1	0	0	0	0	0	4	6	0	0	0	1	0	0
19/08/2015	16:44:00	5640	1 day, 5:00:00	1	31	6	cod	5	0	1	0	0	0	0	3	1	0	0	0	0	0	0
19/08/2015	16:45:00	5700	1 day, 6:00:00	1	31	6	cod	5	1	0	0	0	0	1	1	2	0	0	0	0	0	0
19/08/2015	16:46:00	5760	1:00:00	1	32	7	cod	1	0	0	0	0	0	1	0	0	0	0	0	0	0	0
19/08/2015	16:47:00	5820	2:00:00	1	32	7	cod	2	0	0	0	0	0	1	1	0	0	0	0	0	0	0
19/08/2015	16:48:00	5880	3:00:00	1	32	7	cod	1	0	0	0	0	0	0	1	0	0	0	0	0	0	0
19/08/2015	16:49:00	5940	4:00:00	1	32	7	cod	4	2	0	0	0	0	0	2	0	0	0	0	0	0	0
19/08/2015	16:50:00	6000	5:00:00	1	32	7	tc	3	0	0	0	0	0	0	2	1	0	0	0	0	0	0
19/08/2015	16:50:00	6000	5:00:00	1	32	7	cod	1	0	0	0	0	0	0	1	0	0	0	0	0	0	0
19/08/2015	16:51:00	6060	6:00:00	1	32	7	cod	3	0	0	0	0	0	0	3	0	0	0	0	0	0	0
19/08/2015	16:52:00	6120	7:00:00	1	32	7	tc	2	0	0	0	0	0	0	1	1	0	0	0	0	0	0
19/08/2015	16:52:00	6120	7:00:00	1	32	7	cod	2	0	0	0	0	0	0	1	1	0	0	0	0	0	0
19/08/2015	16:53:00	6180	8:00:00	1	32	7	cod	0	0	0	0	0	0	0	0	0	0	0	0	0	0	0
19/08/2015	16:54:00	6240	9:00:00	1	32	7	cod	0	0	0	0	0	0	0	0	0	0	0	0	0	0	0
19/08/2015	16:55:00	6300	10:00:00	1	32	7	cod	3	0	0	0	0	0	0	1	2	0	0	0	0	0	0
19/08/2015	16:56:00	6360	11:00:00	1	32	7	cod	0	0	0	0	0	0	0	0	0	0	0	0	0	0	0	JELLYFISH
19/08/2015	16:57:00	6420	12:00:00	1	32	7	cod	0	0	0	0	0	0	0	0	0	0	0	0	0	0	0	JELLYFISH
19/08/2015	16:58:00	6480	13:00:00	1	32	7	cod	0	0	0	0	0	0	0	0	0	0	0	0	0	0	0	JELLYFISH
19/08/2015	16:59:00	6540	14:00:00	1	32	7	cod	0	0	0	0	0	0	0	0	0	0	0	0	0	0	0	JELLYFISH
19/08/2015	17:00:00	6600	15:00:00	1	32	7	cod	0	0	0	0	0	0	0	0	0	0	0	0	0	0	0	JELLYFISH
19/08/2015	17:01:00	6660	16:00:00	1	32	7	cod	0	0	0	0	0	0	0	0	0	0	0	0	0	0	0	JELLYFISH
19/08/2015	17:02:00	6720	17:00:00	1	32	7	cod	1	0	0	0	0	0	0	1	0	0	0	0	0	0	0
19/08/2015	17:03:00	6780	18:00:00	1	32	7	tc	1	0	0	0	0	0	0	0	1	0	0	0	0	0	0
19/08/2015	17:03:00	6780	18:00:00	1	32	7	cod	0	0	0	0	0	0	0	0	0	0	0	0	0	0	0
19/08/2015	17:04:00	6840	19:00:00	1	32	7	cod	1	0	0	0	0	0	0	0	1	0	0	0	0	0	0
19/08/2015	17:05:00	6900	20:00:00	1	32	7	cod	0	0	0	0	0	0	0	0	0	0	0	0	0	0	0
19/08/2015	17:06:00	6960	21:00:00	1	32	7	cod	0	0	0	0	0	0	0	0	0	0	0	0	0	0	0
19/08/2015	17:07:00	7020	22:00:00	1	32	7	cod	11	0	1	0	0	0	0	4	6	0	0	0	0	0	0
19/08/2015	17:08:00	7080	23:00:00	1	32	7	cod	2	0	0	0	0	0	0	2	0	0	0	0	0	0	0
19/08/2015	17:09:00	7140	1 day, 0:00:00	1	32	7	cod	1	0	0	0	0	0	0	0	1	0	0	0	0	0	0
19/08/2015	17:10:00	7200	1 day, 1:00:00	1	32	7	tc	1	0	0	0	0	0	0	1	0	0	0	0	0	0	0
19/08/2015	17:10:00	7200	1 day, 1:00:00	1	32	7	cod	2	0	0	0	0	0	0	1	1	0	0	0	0	0	0
19/08/2015	17:11:00	7260	1 day, 2:00:00	1	32	7	tc	1	0	0	0	0	0	0	0	1	0	0	0	0	0	0
19/08/2015	17:11:00	7260	1 day, 2:00:00	1	32	7	cod	3	0	0	0	0	0	0	2	1	0	0	0	0	0	0
19/08/2015	17:12:00	7320	1 day, 3:00:00	1	32	7	cod	0	0	0	0	0	0	0	0	0	0	0	0	0	0	0
19/08/2015	17:13:00	7380	1 day, 4:00:00	1	32	7	cod	0	0	0	0	0	0	0	0	0	0	0	0	0	0	0
19/08/2015	17:14:00	7440	1 day, 5:00:00	1	32	7	cod	1	0	0	0	0	0	0	0	1	0	0	0	0	0	0
19/08/2015	17:15:00	7500	1 day, 6:00:00	1	32	7	tc	1	0	0	0	0	0	0	1	0	0	0	0	0	0	0
19/08/2015	17:15:00	7500	1 day, 6:00:00	1	32	7	cod	0	0	0	0	0	0	0	0	0	0	0	0	0	0	0
19/08/2015	17:16:00	7560	1:00:00	1	33	7	cod	0		0	0	0	0	0	0	0	0	0	0	0	0	0
19/08/2015	17:17:00	7620	2:00:00	1	33	7	cod	0	0	0	0	0	0	0	0	0	0	0	0	0	0	0
19/08/2015	17:18:00	7680	3:00:00	1	33	7	cod	1	0	0	0	0	1	0	0	0	0	0	0	0	0	0
19/08/2015	17:19:00	7740	4:00:00	1	33	7	cod	1	0	0	0	0	0	0	1	0	0	0	0	0	0	0
19/08/2015	17:20:00	7800	5:00:00	1	33	7	tc	1	0	0	0	0	0	0	1	0	0	0	0	0	0	0
19/08/2015	17:20:00	7800	5:00:00	1	33	7	cod	4	0	0	0	0	0	0	3	1	0	0	0	0	0	0
19/08/2015	17:21:00	7860	6:00:00	1	33	7	cod	4	0	0	0	0	0	0	1	3	0	0	0	0	0	0
19/08/2015	17:22:00	7920	7:00:00	1	33	7	cod	2	0	0	0	0	0	1	0	1	0	0	0	0	0	0
19/08/2015	17:23:00	7980	8:00:00	1	33	7	cod	5	0	0	0	0	0	0	1	4	0	0	0	0	0	0
19/08/2015	17:24:00	8040	9:00:00	1	33	7	tc	1	0	0	0	0	0	0	1	0	0	0	0	0	0	0
19/08/2015	17:24:00	8040	9:00:00	1	33	7	cod	1	0	0	0	0	0	0	0	1	0	0	0	0	0	0
19/08/2015	17:25:00	8100	10:00:00	1	33	7	cod	2	0	0	0	0	0	0	2	0	0	0	0	0	0	0
19/08/2015	17:26:00	8160	11:00:00	1	33	7	cod	1	0	0	0	0	0	1	0	0	0	0	0	0	0	0
19/08/2015	17:27:00	8220	12:00:00	1	33	7	cod	0	0	0	0	0	0	0	0	0	0	0	0	0	0	0
19/08/2015	17:28:00	8280	13:00:00	1	33	7	tc	1	0	0	0	0	0	0	0	1	0	0	0	0	0	0
19/08/2015	17:28:00	8280	13:00:00	1	33	7	cod	2	0	0	0	0	0	0	1	1	0	0	0	0	0	0
19/08/2015	17:29:00	8340	14:00:00	1	33	7	tc	1	0	0	0	0	0	0	1	0	0	0	0	0	0	0
19/08/2015	17:29:00	8340	14:00:00	1	33	7	cod	1	0	0	0	0	0	0	1	0	0	0	0	0	0	0
19/08/2015	17:30:00	8400	15:00:00	1	33	7	cod	2	0	0	0	0	0	0	1	1	0	0	0	0	0	0
19/08/2015	17:31:00	8460	16:00:00	1	33	7	tc	1	0	0	0	0	0	0	1	0	0	0	0	0	0	0
19/08/2015	17:31:00	8460	16:00:00	1	33	7	cod	0	0	0	0	0	0	0	0	0	0	0	0	0	0	0
19/08/2015	17:32:00	8520	17:00:00	1	33	7	cod	3	0	0	0	0	0	2	0	1	0	0	0	0	0	0
19/08/2015	17:33:00	8580	18:00:00	1	33	7	tc	1	0	0	0	0	0	0	1	0	0	0	0	0	0	0
19/08/2015	17:33:00	8580	18:00:00	1	33	7	cod	1	0	0	0	0	0	0	0	1	0	0	0	0	0	0
19/08/2015	17:34:00	8640	19:00:00	1	33	7	tc	1	0	0	0	0	0	0	0	1	0	0	0	0	0	0
19/08/2015	17:34:00	8640	19:00:00	1	33	7	cod	2	0	0	0	0	0	0	1	1	0	0	0	0	0	0
19/08/2015	17:35:00	8700	20:00:00	1	33	7	cod	0	0	0	0	0	0	0	0	0	0	0	0	0	0	0
19/08/2015	17:36:00	8760	21:00:00	1	33	7	cod	2	1	0	0	0	0	0	1	0	0	0	0	0	0	0
19/08/2015	17:37:00	8820	22:00:00	1	33	7	cod	2	2	0	0	0	0	0	0	0	0	0	0	0	0	0
19/08/2015	17:38:00	8880	23:00:00	1	33	7	tc	1	0	0	0	0	0	0	0	1	0	0	0	0	0	0
19/08/2015	17:38:00	8880	23:00:00	1	33	7	cod	0	0	0	0	0	0	0	0	0	0	0	0	0	0	0
19/08/2015	17:39:00	8940	1 day, 0:00:00	1	33	7	cod	2	0	0	0	0	0	0	0	2	0	0	0	0	0	0
19/08/2015	17:40:00	9000	1 day, 1:00:00	1	33	7	tc	1	0	0	0	0	0	0	1	0	0	0	0	0	0	0
19/08/2015	17:40:00	9000	1 day, 1:00:00	1	33	7	cod	2	1	0	0	0	0	0	1	0	0	0	0	0	0	0
19/08/2015	17:41:00	9060	1 day, 2:00:00	1	33	7	cod	4	0	0	0	0	0	0	2	2	0	0	0	0	0	0
19/08/2015	17:42:00	9120	1 day, 3:00:00	1	33	7	cod	1	1	0	0	0	0	0	0	0	0	0	0	0	0	0
19/08/2015	17:43:00	9180	1 day, 4:00:00	1	33	7	cod	2	0	0	0	0	0	0	1	1	0	0	0	0	0	0
19/08/2015	17:44:00	9240	1 day, 5:00:00	1	33	7	tc	2	0	0	0	0	0	0	1	1	0	0	0	0	0	0
19/08/2015	17:44:00	9240	1 day, 5:00:00	1	33	7	cod	0	0	0	0	0	0	0	0	0	0	0	0	0	0	0
19/08/2015	17:45:00	9300	1 day, 6:00:00	1	33	7	cod	0	0	0	0	0	0	0	0	0	0	0	0	0	0	0
19/08/2015	17:46:00	9360	1:00:00	1	34	7	cod	1	0	0	0	0	0	0	0	1	0	0	0	0	0	0
19/08/2015	17:47:00	9420	2:00:00	1	34	7	cod	3	2	0	0	0	0	0	1	0	0	0	0	0	0	0
19/08/2015	17:48:00	9480	3:00:00	1	34	7	cod	1	0	0	0	0	0	0	1	0	0	0	0	0	0	0
19/08/2015	17:49:00	9540	4:00:00	1	34	7	cod	2	0	0	0	0	1	0	1	0	0	0	0	0	0	0
19/08/2015	17:50:00	9600	5:00:00	1	34	7	cod	4	0	0	0	0	0	1	3	0	0	0	0	0	0	0
19/08/2015	17:51:00	9660	6:00:00	1	34	7	cod	3	1	0	0	0	0	0	2	0	2	2	0	0	2	0
19/08/2015	17:52:00	9720	7:00:00	1	34	7	cod	0	0	0	0	0	0	0	0	0	0	0	0	0	0	0
19/08/2015	17:53:00	9780	8:00:00	1	34	7	cod	6	0	1	0	0	1	0	2	2	0	0	0	0	0	0
19/08/2015	17:54:00	9840	9:00:00	1	34	7	tc	2	0	0	0	0	0	0	1	1	0	0	0	0	0	0
19/08/2015	17:54:00	9840	9:00:00	1	34	7	cod	4	1	0	0	0	0	1	1	1	0	0	0	0	0	0	Short Video Only 9 Min?
19/08/2015	17:55:00	9900	1:00:00	1	35	7	tc	1	0	0	0	0	0	0	1	0	0	0	0	0	0	0
19/08/2015	17:55:00	9900	1:00:00	1	35	7	cod	1	0	0	0	0	0	0	1	0	0	0	0	0	0	0
19/08/2015	17:56:00	9960	2:00:00	1	35	7	cod	1	0	0	0	0	0	1	0	0	0	0	0	0	0	0
19/08/2015	17:57:00	10020	3:00:00	1	35	7	tc	1	0	0	0	0	0	0	0	1	0	0	0	0	0	0
19/08/2015	17:57:00	10020	3:00:00	1	35	7	cod	1	0	0	0	0	0	0	1	0	0	0	0	0	0	0
19/08/2015	17:58:00	10080	4:00:00	1	35	7	cod	3	0	0	0	0	0	0	3	0	0	0	0	0	0	0
19/08/2015	17:59:00	10140	5:00:00	1	35	7	cod	2	1	0	0	0	0	0	1	0	0	0	0	0	0	0
19/08/2015	18:00:00	10200	6:00:00	1	35	7	tc	0	1	0	0	0	0	0	1	0	0	0	0	0	0	0
19/08/2015	18:00:00	10200	6:00:00	1	35	7	cod	2	0	0	0	0	0	1	1	0	0	0	0	0	0	0
19/08/2015	18:01:00	10260	7:00:00	1	35	7	cod	1	0	0	0	0	0	0	0	1	0	0	0	0	0	0
19/08/2015	18:02:00	10320	8:00:00	1	35	7	cod	0	0	0	0	0	0	0	0	0	0	0	0	0	0	0
19/08/2015	18:03:00	10380	9:00:00	1	35	7	cod	0	0	0	0	0	0	0	0	0	0	0	0	0	0	0
19/08/2015	18:04:00	10440	10:00:00	1	35	7	cod	0	0	0	0	0	0	0	0	0	0	0	0	0	0	0
19/08/2015	18:05:00	10500	11:00:00	1	35	7	cod	0	0	0	0	0	0	0	0	0	0	0	0	0	0	0
19/08/2015	18:06:00	10560	12:00:00	1	35	7	tc	1	0	0	0	0	0	0	1	0	0	0	0	0	0	0
19/08/2015	18:06:00	10560	12:00:00	1	35	7	cod	0	0	0	0	0	0	0	0	0	0	0	0	0	0	0
19/08/2015	18:07:00	10620	13:00:00	1	35	7	cod	1	1	0	0	0	0	0	0	0	0	0	0	0	0	0
19/08/2015	18:08:00	10680	14:00:00	1	35	7	cod	0	0	0	0	0	0	0	0	0	0	0	0	0	0	0
19/08/2015	18:09:00	10740	15:00:00	1	35	7	cod	2	0	0	0	1	0	0	1	0	0	0	0	0	0	0
19/08/2015	18:10:00	10800	16:00:00	1	35	7	tc	1	0	0	0	0	0	0	1	0	0	0	0	0	0	0
19/08/2015	18:10:00	10800	16:00:00	1	35	7	cod	0	0	0	0	0	0	0	0	0	0	0	0	0	0	0
19/08/2015	18:11:00	10860	17:00:00	1	35	7	cod	1	1	0	0	0	0	0	0	0	0	0	0	0	0	0
19/08/2015	18:12:00	10920	18:00:00	1	35	7	cod	0	0	0	0	0	0	0	0	0	0	0	0	0	0	0
19/08/2015	18:13:00	10980	19:00:00	1	35	7	cod	3	0	0	0	0	0	1	2	0	0	0	0	0	0	0
19/08/2015	18:14:00	11040	20:00:00	1	35	7	tc	1	0	0	0	0	0	0	1	0	0	0	0	0	0	0
19/08/2015	18:14:00	11040	20:00:00	1	35	7	cod	3	0	0	0	0	1	1	1	0	0	0	0	0	0	0
19/08/2015	18:15:00	11100	21:00:00	1	35	7	cod	0	0	0	0	0	0	0	0	0	0	0	0	0	0	0
19/08/2015	18:16:00	11160	22:00:00	1	35	7	cod	0	0	0	0	0	0	0	0	0	0	0	0	0	0	0
19/08/2015	18:17:00	11220	23:00:00	1	35	7	cod	0	0	0	0	0	0	0	0	0	0	0	0	0	0	0
19/08/2015	18:18:00	11280	1 day, 0:00:00	1	35	7	cod	0	0	0	0	0	0	0	0	0	1	0	1	0	1	0
19/08/2015	18:19:00	11340	1 day, 1:00:00	1	35	7	cod	3	0	0	0	0	0	0	1	0	0	0	0	0	0	0
19/08/2015	18:20:00	11400	1 day, 2:00:00	1	35	7	cod	1	1	0	0	0	0	0	0	0	0	0	0	0	0	0
19/08/2015	18:21:00	11460	1 day, 3:00:00	1	35	7	cod	0	0	0	0	0	0	0	0	0	0	0	0	0	0	0
19/08/2015	18:22:00	11520	1 day, 4:00:00	1	35	7	cod	0	0	0	0	0	0	0	0	0	0	0	0	0	0	0
19/08/2015	18:23:00	11580	1 day, 5:00:00	1	35	7	tc	1	0	0	0	0	0	1	0	0	0	0	0	0	0	0
19/08/2015	18:23:00	11580	1 day, 5:00:00	1	35	7	cod	1	0	0	0	0	1	0	0	0	0	0	0	0	0	0
19/08/2015	18:24:00	11640	1 day, 6:00:00	1	35	7	cod	0	0	0	0	0	0	0	0	0	0	0	0	0	0	0
19/08/2015	18:25:00	11700	1:00:00	1	36	7	cod	0	0	0	0	0	0	0	0	0	0	0	0	0	0	0
19/08/2015	18:26:00	11760	2:00:00	1	36	7	tc	1	0	0	0	0	0	1	0	0	0	0	0	0	0	0
19/08/2015	18:26:00	11760	2:00:00	1	36	7	cod	0	0	0	0	0	0	0	0	0	0	0	0	0	0	0
19/08/2015	18:27:00	11820	3:00:00	1	36	7	cod	0	0	0	0	0	0	0	0	0	0	0	0	0	0	0
19/08/2015	18:28:00	11880	4:00:00	1	36	7	cod	2	0	0	0	0	1	1	0	0	1	0	1	0	1	0
19/08/2015	18:29:00	11940	5:00:00	1	36	7	cod	3	0	0	0	0	2	0	1	0	0	0	0	0	0	0
19/08/2015	18:30:00	12000	6:00:00	1	36	7	cod	0	0	0	0	0	0	0	0	0	0	0	0	0	0	0
19/08/2015	18:31:00	12060	7:00:00	1	36	7	cod	0	0	0	0	0	0	0	0	0	0	0	0	0	0	0
19/08/2015	18:32:00	12120	8:00:00	1	36	7	tc	1	0	0	0	0	0	0	1	0	0	0	0	0	0	0
19/08/2015	18:32:00	12120	8:00:00	1	36	7	cod	0	0	0	0	0	0	0	0	0	0	0	0	0	0	0
19/08/2015	18:33:00	12180	9:00:00	1	36	7	cod	1	0	0	0	0	1	0	0	0	0	0	0	0	0	0
19/08/2015	18:34:00	12240	10:00:00	1	36	7	tc	2	0	0	0	0	0	1	1	0	0	0	0	0	0	0
19/08/2015	18:34:00	12240	10:00:00	1	36	7	cod	2	0	0	0	0	0	0	2	0	0	0	0	0	0	0
19/08/2015	18:35:00	12300	11:00:00	1	36	7	cod	2	0	0	0	0	1	0	1	0	0	0	0	0	0	0
19/08/2015	18:36:00	12360	12:00:00	1	36	7	cod	1	0	0	0	0	0	0	1	0	0	0	0	0	0	0
19/08/2015	18:37:00	12420	13:00:00	1	36	7	tc	1	0	0	0	0	0	1	0	0	0	0	0	0	0	0
19/08/2015	18:37:00	12420	13:00:00	1	36	7	cod	2	0	0	0	1	1	0	0	0	0	0	0	0	0	0
19/08/2015	18:38:00	12480	14:00:00	1	36	7	cod	3	0	0	0	0	0	6	0	0	0	0	0	0	0	0
19/08/2015	18:39:00	12540	15:00:00	1	36	7	cod	3	0	0	0	0	2	1	0	0	0	0	0	0	0	0
19/08/2015	18:40:00	12600	16:00:00	1	36	7	cod	0	0	0	0	0	0	0	0	0	0	0	0	0	0	0
19/08/2015	18:41:00	12660	17:00:00	1	36	7	cod	0	0	0	0	0	0	0	0	0	0	0	0	0	0	0
19/08/2015	18:42:00	12720	18:00:00	1	36	7	cod	0	0	0	0	0	0	0	0	0	0	0	0	0	0	0
19/08/2015	18:43:00	12780	19:00:00	1	36	7	cod	0	0	0	0	0	0	0	0	0	0	0	0	0	0	0
19/08/2015	18:44:00	12840	20:00:00	1	36	7	cod	1	0	0	0	0	1	0	0	0	0	0	0	0	0	0
19/08/2015	18:45:00	12900	21:00:00	1	36	7	cod	2	0	0	0	0	1	1	0	0	0	0	0	0	0	0
19/08/2015	18:46:00	12960	22:00:00	1	36	7	cod	1	0	0	0	0	1	1	0	0	1	0	1	0	1	0
19/08/2015	18:47:00	13020	23:00:00	1	36	7	cod	1	0	0	0	0	1	0	0	0	0	0	0	0	0	0
19/08/2015	18:48:00	13080	1 day, 0:00:00	1	36	7	cod	2	0	0	0	0	1	1	0	0	0	0	0	0	0	0
19/08/2015	18:49:00	13140	1 day, 1:00:00	1	36	7	tc	1	0	0	0	0	0	1	0	0	0	0	0	0	0	0
19/08/2015	18:49:00	13140	1 day, 1:00:00	1	36	7	cod	1	0	0	0	0	1	0	0	0	0	0	0	0	0	0
19/08/2015	18:50:00	13200	1 day, 2:00:00	1	36	7	cod	0	0	0	0	0	0	0	0	0	1	0	1	0	1	0
19/08/2015	18:51:00	13260	1 day, 3:00:00	1	36	7	cod	1	0	0	0	0	0	0	1	0	0	0	0	0	0	0
19/08/2015	18:52:00	13320	1 day, 4:00:00	1	36	7	cod	3	0	1	0	0	0	2	0	0	0	0	0	0	0	0
19/08/2015	18:53:00	13380	1 day, 5:00:00	1	36	7	cod	1	0	0	0	0	0	0	0	1	1	0	1	0	1	0
19/08/2015	18:54:00	13440	1 day, 6:00:00	1	36	7	cod	2	0	0	0	0	1	1	0	0	0	0	0	0	0	0
20/08/2015	7:40:00	61680	1:00:00	1	66	5	cod	5	0	0	0	0	4	1	0	0	0	0	0	0	0	0
20/08/2015	7:41:00	61740	2:00:00	1	66	5	cod	4	0	1	0	0	2	1	0	0	0	0	0	0	0	0
20/08/2015	7:42:00	61800	3:00:00	1	66	5	cod	2	0	0	0	0	1	1	0	0	0	0	0	0	0	0
20/08/2015	7:43:00	61860	4:00:00	1	66	5	cod	3	0	0	0	0	3	0	0	0	0	0	0	0	0	0
20/08/2015	7:44:00	61920	5:00:00	1	66	5	cod	2	0	0	0	0	1	0	0	1	0	0	0	0	0	0
20/08/2015	7:45:00	61980	6:00:00	1	66	5	cod	2	0	0	0	1	0	1	0	0	0	0	0	0	0	0
20/08/2015	7:46:00	62040	7:00:00	1	66	5	cod	0	0	0	0	0	0	0	0	0	0	0	0	0	0	0
20/08/2015	7:47:00	62100	8:00:00	1	66	5	cod	1	0	1	0	0	0	0	0	0	0	0	0	0	0	0
20/08/2015	7:48:00	62160	9:00:00	1	66	5	cod	2	0	0	0	0	2	0	0	0	0	0	0	0	0	0
20/08/2015	7:49:00	62220	10:00:00	1	66	5	cod	2	0	0	0	0	2	0	0	0	0	0	0	0	0	0
20/08/2015	7:50:00	62280	11:00:00	1	66	5	tc	1	0	0	0	0	1	0	0	0	0	0	0	0	0	0
20/08/2015	7:50:00	62280	11:00:00	1	66	5	cod	1	0	0	0	1	0	0	0	0	0	0	0	0	0	0
20/08/2015	7:51:00	62340	12:00:00	1	66	5	cod	17	0	11	4	0	0	0	0	2	0	0	0	0	0	0
20/08/2015	7:52:00	62400	13:00:00	1	66	5	cod	0	0	0	0	0	0	0	0	0	0	0	0	0	0	0
20/08/2015	7:53:00	62460	14:00:00	1	66	5	cod	0	0	0	0	0	0	0	0	0	0	0	0	0	0	0
20/08/2015	7:54:00	62520	15:00:00	1	66	5	cod	0	0	0	0	0	0	0	0	0	0	0	0	0	0	0
20/08/2015	7:55:00	62580	16:00:00	1	66	5	cod	0	0	0	0	0	0	0	0	0	0	0	0	0	0	0
20/08/2015	7:56:00	62640	17:00:00	1	66	5	cod	0	0	0	0	0	0	0	0	0	0	0	0	0	0	0
20/08/2015	7:57:00	62700	18:00:00	1	66	5	cod	2	0	0	0	0	2	0	0	0	1	0	1	0	0	0
20/08/2015	7:58:00	62760	19:00:00	1	66	5	cod	1	0	0	0	0	0	1	0	0	0	0	0	1	0	0
20/08/2015	7:59:00	62820	20:00:00	1	66	5	cod	1	1	0	0	0	0	0	0	0	1	0	1	0	0	0
20/08/2015	8:00:00	62880	21:00:00	1	66	5	cod	1	0	0	0	0	1	0	0	0	1	0	1	0	1	0
20/08/2015	8:01:00	62940	22:00:00	1	66	5	cod	2	0	0	0	0	2	0	0	0	0	0	0	0	1	0
20/08/2015	8:02:00	63000	23:00:00	1	66	5	cod	1	0	0	0	0	1	0	0	0	0	0	0	0	0	0
20/08/2015	8:03:00	63060	1 day, 0:00:00	1	66	5	cod	1	0	0	0	0	1	0	0	0	0	0	0	0	0	0
20/08/2015	8:04:00	63120	1 day, 1:00:00	1	66	5	cod	1	0	0	0	0	1	0	0	0	1	0	1	0	0	0
20/08/2015	8:05:00	63180	1 day, 2:00:00	1	66	5	cod	0	0	0	0	0	0	0	0	0	0	0	0	1	0	0
20/08/2015	8:06:00	63240	1 day, 3:00:00	1	66	5	cod	0	0	0	0	0	0	0	0	0	0	0	0	0	0	0
20/08/2015	8:07:00	63300	1 day, 4:00:00	1	66	5	cod	0	0	0	0	0	0	0	0	0	0	0	0	0	0	0
20/08/2015	8:08:00	63360	1 day, 5:00:00	1	66	5	cod	0	0	0	0	0	0	0	0	0	0	0	0	0	0	0
20/08/2015	8:09:00	63420	1 day, 6:00:00	1	66	5	cod	0	0	0	0	0	0	0	0	0	0	0	0	0	0	0
20/08/2015	8:10:00	63480	1:00:00	1	67	5	cod	1	0	0	0	1	0	0	0	0	1	0	1	0	0	0
20/08/2015	8:11:00	63540	2:00:00	1	67	5	tc	1	0	0	0	0	1	0	0	0	0	0	0	0	0	0
20/08/2015	8:11:00	63540	2:00:00	1	67	5	cod	1	0	0	0	1	0	0	0	0	0	0	0	1	0	0
20/08/2015	8:12:00	63600	3:00:00	1	67	5	cod	2	0	0	0	1	0	1	0	0	0	0	0	0	0	0
20/08/2015	8:13:00	63660	4:00:00	1	67	5	cod	0	0	0	0	0	0	0	0	0	0	0	0	0	0	0
20/08/2015	8:14:00	63720	5:00:00	1	67	5	cod	2	0	0	0	0	2	0	0	0	1	0	1	1	0	0
20/08/2015	8:15:00	63780	6:00:00	1	67	5	cod	3	0	0	0	0	3	0	0	0	0	0	0	0	0	0
20/08/2015	8:16:00	63840	7:00:00	1	67	5	tc	1	0	0	0	0	1	0	0	0	0	0	0	0	0	0
20/08/2015	8:16:00	63840	7:00:00	1	67	5	cod	2	0	0	0	0	2	0	0	0	0	0	0	0	0	0
20/08/2015	8:17:00	63900	8:00:00	1	67	5	cod	1	0	1	0	0	0	0	0	0	0	0	0	0	0	0
20/08/2015	8:18:00	63960	9:00:00	1	67	5	cod	2	0	1	0	0	1	0	0	0	0	0	0	0	0	0
20/08/2015	8:19:00	64020	10:00:00	1	67	5	cod	1	0	0	0	0	1	0	0	0	0	0	0	0	0	0
20/08/2015	8:20:00	64080	11:00:00	1	67	5	cod	0	0	0	0	0	0	0	0	0	0	0	0	0	0	0
20/08/2015	8:21:00	64140	12:00:00	1	67	5	cod	1	0	0	0	0	0	0	1	0	0	0	0	0	0	0
20/08/2015	8:22:00	64200	13:00:00	1	67	5	cod	2	0	1	1	0	0	0	0	0	0	0	0	0	0	0
20/08/2015	8:23:00	64260	14:00:00	1	67	5	cod	0	0	0	0	0	0	0	0	0	0	0	0	0	0	0
20/08/2015	8:24:00	64320	15:00:00	1	67	5	cod	1	0	1	0	0	0	0	0	0	0	0	0	0	0	0
20/08/2015	8:25:00	64380	16:00:00	1	67	5	cod	0	0	0	0	0	0	0	0	0	2	0	2	1	1	0
20/08/2015	8:26:00	64440	17:00:00	1	67	5	cod	0	0	0	0	0	0	0	0	0	0	0	0	0	0	0
20/08/2015	8:27:00	64500	18:00:00	1	67	5	cod	0	0	0	0	0	0	0	0	0	0	0	0	0	0	0
20/08/2015	8:28:00	64560	19:00:00	1	67	5	cod	0	0	0	0	0	0	0	0	0	0	0	0	0	0	0
20/08/2015	8:29:00	64620	20:00:00	1	67	5	cod	1	0	0	0	0	1	0	0	0	0	0	0	0	0	0
20/08/2015	8:30:00	64680	21:00:00	1	67	5	tc	1	0	0	0	0	1	0	0	0	0	0	0	0	0	0
20/08/2015	8:30:00	64680	21:00:00	1	67	5	cod	1	0	0	0	0	1	0	0	0	0	0	0	0	0	0
20/08/2015	8:31:00	64740	22:00:00	1	67	5	cod	2	0	0	0	0	2	0	0	0	0	0	0	0	0	0
20/08/2015	8:32:00	64800	23:00:00	1	67	5	cod	0	0	0	0	0	0	0	0	0	2	0	2	0	1	0
20/08/2015	8:33:00	64860	1 day, 0:00:00	1	67	5	cod	0	0	0	0	0	0	0	0	0	0	0	0	1	0	0
20/08/2015	8:34:00	64920	1 day, 1:00:00	1	67	5	cod	0	0	0	0	0	0	0	0	0	0	0	0	0	0	0
20/08/2015	8:35:00	64980	1 day, 2:00:00	1	67	5	cod	0	0	0	0	0	0	0	0	0	0	0	0	0	0	0
20/08/2015	8:36:00	65040	1 day, 3:00:00	1	67	5	cod	1	0	0	0	0	1	0	0	0	1	0	1	0	0	0
20/08/2015	8:37:00	65100	1 day, 4:00:00	1	67	5	cod	0	0	0	0	0	0	0	0	0	0	0	0	1	0	0
20/08/2015	8:38:00	65160	1 day, 5:00:00	1	67	5	cod	3	0	1	0	0	2	0	0	0	1	0	1	0	0	0
20/08/2015	8:39:00	65220	1 day, 6:00:00	1	67	5	cod	1	0	0	0	0	0	0	1	0	0	0	0	1	0	0
20/08/2015	8:40:00	65280	1:00:00	1	68	5	tc	2	0	0	0	0	2	0	0	0	0	0	0	0	0	0
20/08/2015	8:40:00	65280	1:00:00	1	68	5	cod	0	0	0	0	0	0	0	0	0	0	0	0	0	0	0
20/08/2015	8:41:00	65340	2:00:00	1	68	5	cod	0	0	0	0	0	0	0	0	0	0	0	0	0	0	0	Pot Removed from Water @ 8:46:00 AM
20/08/2015	10:34:00	0	0:00:00	2	69																		Start
20/08/2015	10:35:00	60	1:00:00	2	69		cod	0	0	0	0	0	0	0	0	0	0	0	0	0	0	0	Being Deployed
20/08/2015	10:36:00	120	2:00:00	2	69		cod	0	0	0	0	0	0	0	0	0	0	0	0	0	0	0	Being Deployed
20/08/2015	10:37:00	180	3:00:00	2	69		cod	0	0	0	0	0	0	0	0	0	0	0	0	0	0	0	Being Deployed
20/08/2015	10:38:00	240	4:00:00	2	69	7	cod	10	0	6	3	1	0	0	0	0	0	0	0	0	0	0
20/08/2015	10:39:00	300	5:00:00	2	69	7	cod	7	0	2	3	2	0	0	0	0	0	0	0	0	0	0
20/08/2015	10:40:00	360	6:00:00	2	69	7	cod	1	0	0	0	0	0	0	1	0	0	0	0	0	0	0
20/08/2015	10:41:00	420	7:00:00	2	69	7	cod	0	0	0	0	0	0	0	0	0	0	0	0	0	0	0
20/08/2015	10:42:00	480	8:00:00	2	69	7	cod	0	0	0	0	0	0	0	0	0	0	0	0	0	0	0
20/08/2015	10:43:00	540	9:00:00	2	69	7	cod	0	0	0	0	0	0	0	0	0	0	0	0	0	0	0
20/08/2015	10:44:00	600	10:00:00	2	69	7	cod	0	0	0	0	0	0	0	0	0	0	0	0	0	0	0
20/08/2015	10:45:00	660	11:00:00	2	69	7	cod	0	0	0	0	0	0	0	0	0	0	0	0	0	0	0
20/08/2015	10:46:00	720	12:00:00	2	69	7	cod	0	0	0	0	0	0	0	0	0	0	0	0	0	0	0
20/08/2015	10:47:00	780	13:00:00	2	69	7	cod	0	0	0	0	0	0	0	0	0	0	0	0	0	0	0
20/08/2015	10:48:00	840	14:00:00	2	69	7	cod	0	0	0	0	0	0	0	0	0	0	0	0	0	0	0
20/08/2015	10:49:00	900	15:00:00	2	69	7	cod	0	0	0	0	0	0	0	0	0	0	0	0	0	0	0
20/08/2015	10:50:00	960	16:00:00	2	69	7	cod	0	0	0	0	0	0	0	0	0	0	0	0	0	0	0
20/08/2015	10:51:00	1020	17:00:00	2	69	8	cod	0	0	0	0	0	0	0	0	0	0	0	0	0	0	0
20/08/2015	10:52:00	1080	18:00:00	2	69	8	cod	0	0	0	0	0	0	0	0	0	0	0	0	0	0	0
20/08/2015	10:53:00	1140	19:00:00	2	69	8	cod	0	0	0	0	0	0	0	0	0	0	0	0	0	0	0
20/08/2015	10:54:00	1200	20:00:00	2	69	8	cod	0	0	0	0	0	0	0	0	0	0	0	0	0	0	0
20/08/2015	10:55:00	1260	21:00:00	2	69	8	cod	0	0	0	0	0	0	0	0	0	0	0	0	0	0	0
20/08/2015	10:56:00	1320	22:00:00	2	69	8	cod	0	0	0	0	0	0	0	0	0	0	0	0	0	0	0
20/08/2015	10:57:00	1380	23:00:00	2	69	8	cod	0	0	0	0	0	0	0	0	0	0	0	0	0	0	0
20/08/2015	10:58:00	1440	1 day, 0:00:00	2	69	8	cod	0	0	0	0	0	0	0	0	0	0	0	0	0	0	0
20/08/2015	10:59:00	1500	1 day, 1:00:00	2	69	8	cod	0	0	0	0	0	0	0	0	0	0	0	0	0	0	0
20/08/2015	11:00:00	1560	1 day, 2:00:00	2	69	8	cod	0	0	0	0	0	0	0	0	0	0	0	0	0	0	0
20/08/2015	11:01:00	1620	1 day, 3:00:00	2	69	8	cod	0	0	0	0	0	0	0	0	0	0	0	0	0	0	0
20/08/2015	11:02:00	1680	1 day, 4:00:00	2	69	8	cod	0	0	0	0	0	0	0	0	0	0	0	0	0	0	0
20/08/2015	11:03:00	1740	1 day, 5:00:00	2	69	8	cod	0	0	0	0	0	0	0	0	0	0	0	0	0	0	0
20/08/2015	11:04:00	1800	1 day, 6:00:00	2	69	8	cod	0	0	0	0	0	0	0	0	0	0	0	0	0	0	0
20/08/2015	11:05:00	1860	1:00:00	2	70	8	cod	0	0	0	0	0	0	0	0	0	0	0	0	0	0	0
20/08/2015	11:06:00	1920	2:00:00	2	70	8	cod	0	0	0	0	0	0	0	0	0	0	0	0	0	0	0
20/08/2015	11:07:00	1980	3:00:00	2	70	8	cod	0	0	0	0	0	0	0	0	0	0	0	0	0	0	0
20/08/2015	11:08:00	2040	4:00:00	2	70	8	cod	0	0	0	0	0	0	0	0	0	0	0	0	0	0	0
20/08/2015	11:09:00	2100	5:00:00	2	70	8	cod	0	0	0	0	0	0	0	0	0	0	0	0	0	0	0
20/08/2015	11:10:00	2160	6:00:00	2	70	8	cod	1	1	0	0	0	0	0	0	0	0	0	0	0	0	0
20/08/2015	11:11:00	2220	7:00:00	2	70	8	cod	0	0	0	0	0	0	0	0	0	0	0	0	0	0	0
20/08/2015	11:12:00	2280	8:00:00	2	70	8	cod	0	0	0	0	0	0	0	0	0	0	0	0	0	0	0
20/08/2015	11:13:00	2340	9:00:00	2	70	8	cod	0	0	0	0	0	0	0	0	0	0	0	0	0	0	0
20/08/2015	11:14:00	2400	10:00:00	2	70	8	cod	1	0	0	0	0	0	0	0	1	0	0	0	0	0	0
20/08/2015	11:15:00	2460	11:00:00	2	70	8	cod	0	0	0	0	0	0	0	0	0	0	0	0	0	0	0
20/08/2015	11:16:00	2520	12:00:00	2	70	8	cod	1	0	0	0	0	0	0	0	1	0	0	0	0	0	0
20/08/2015	11:17:00	2580	13:00:00	2	70	8	cod	0	0	0	0	0	0	0	0	0	0	0	0	0	0	0
20/08/2015	11:18:00	2640	14:00:00	2	70	8	cod	0	0	0	0	0	0	0	0	0	0	0	0	0	0	0
20/08/2015	11:19:00	2700	15:00:00	2	70	8	tc	1	1	0	0	0	0	0	0	0	0	0	0	0	0	0
20/08/2015	11:19:00	2700	15:00:00	2	70	8	cod	2	2	0	0	0	0	0	0	0	0	0	0	0	0	0
20/08/2015	11:20:00	2760	16:00:00	2	70	8	cod	0	0	0	0	0	0	0	0	0	0	0	0	0	0	0
20/08/2015	11:21:00	2820	17:00:00	2	70	8	cod	0	0	0	0	0	0	0	0	0	0	0	0	0	0	0
20/08/2015	11:22:00	2880	18:00:00	2	70	8	tc	2	2	0	0	0	0	0	0	0	0	0	0	0	0	0
20/08/2015	11:22:00	2880	18:00:00	2	70	8	cod	0	0	0	0	0	0	0	0	0	0	0	0	0	0	0
20/08/2015	11:23:00	2940	19:00:00	2	70	8	cod	1	1	0	0	0	0	0	0	0	0	0	0	0	0	0
20/08/2015	11:24:00	3000	20:00:00	2	70	8	tc	1	1	0	0	0	0	0	0	0	0	0	0	0	0	0
20/08/2015	11:24:00	3000	20:00:00	2	70	8	cod	1	0	0	0	0	0	0	0	1	0	0	0	0	0	0
20/08/2015	11:25:00	3060	21:00:00	2	70	8	cod	1	0	0	0	0	0	0	0	1	0	0	0	0	0	0
20/08/2015	11:26:00	3120	22:00:00	2	70	8	cod	2	2	0	0	0	0	0	0	0	0	0	0	0	0	0
20/08/2015	11:27:00	3180	23:00:00	2	70	8	tc	2	1	0	0	0	0	0	0	1	0	0	0	0	0	0
20/08/2015	11:27:00	3180	23:00:00	2	70	8	cod	4	2	0	0	0	0	0	0	2	0	0	0	0	0	0
20/08/2015	11:28:00	3240	1 day, 0:00:00	2	70	8	tc	1	1	0	0	0	0	0	0	0	0	0	0	0	0	0
20/08/2015	11:28:00	3240	1 day, 0:00:00	2	70	8	cod	1	0	1	0	0	0	0	0	0	0	0	0	0	0	0
20/08/2015	11:29:00	3300	1 day, 1:00:00	2	70	8	cod	0	0	0	0	0	0	0	0	0	0	0	0	0	0	0
20/08/2015	11:30:00	3360	1 day, 2:00:00	2	70	8	cod	0	0	0	0	0	0	0	0	0	0	0	0	0	0	0
20/08/2015	11:31:00	3420	1 day, 3:00:00	2	70	8	cod	1	1	0	0	0	0	0	0	0	0	0	0	0	0	0
20/08/2015	11:32:00	3480	1 day, 4:00:00	2	70	8	cod	1	1	0	0	0	0	0	0	0	0	0	0	0	0	0
20/08/2015	11:33:00	3540	1 day, 5:00:00	2	70	8	tc	1	1	0	0	0	0	0	0	0	0	0	0	0	0	0
20/08/2015	11:33:00	3540	1 day, 5:00:00	2	70	8	cod	1	1	0	0	0	0	0	0	0	0	0	0	0	0	0
20/08/2015	11:34:00	3600	1 day, 6:00:00	2	70	8	cod	2	2	0	0	0	0	0	0	0	0	0	0	0	0	0
20/08/2015	11:35:00	3660	1:00:00	2	71	8	cod	1	1	0	0	0	0	0	0	0	0	0	0	0	0	0
20/08/2015	11:36:00	3720	2:00:00	2	71	8	cod	1	1	0	0	0	0	0	0	0	0	0	0	0	0	0
20/08/2015	11:37:00	3780	3:00:00	2	71	8	cod	0	0	0	0	0	0	0	0	0	0	0	0	0	0	0
20/08/2015	11:38:00	3840	4:00:00	2	71	8	cod	9	2	1	0	1	1	0	3	1	0	0	0	0	0	0
20/08/2015	11:39:00	3900	5:00:00	2	71	8	cod	3	0	1	0	1	0	0	0	1	0	0	0	0	0	0
20/08/2015	11:40:00	3960	6:00:00	2	71	8	tc	1	1	0	0	0	0	0	0	0	0	0	0	0	0	0
20/08/2015	11:40:00	3960	6:00:00	2	71	8	cod	1	1	0	0	0	0	0	0	0	0	0	0	0	0	0
20/08/2015	11:41:00	4020	7:00:00	2	71	8	cod	1	0	1	0	0	0	0	0	0	0	0	0	0	0	0
20/08/2015	11:42:00	4080	8:00:00	2	71	8	tc	1	1	0	0	0	0	0	0	0	0	0	0	0	0	0
20/08/2015	11:42:00	4080	8:00:00	2	71	8	cod	1	0	0	0	1	0	0	0	0	0	0	0	0	0	0
20/08/2015	11:43:00	4140	9:00:00	2	71	8	cod	0	0	0	0	0	0	0	0	0	0	0	0	0	0	0
20/08/2015	11:44:00	4200	10:00:00	2	71	8	cod	0	0	0	0	0	0	0	0	0	0	0	0	0	0	0
20/08/2015	11:45:00	4260	11:00:00	2	71	8	cod	0	0	0	0	0	0	0	0	0	0	0	0	0	0	0
20/08/2015	11:46:00	4320	12:00:00	2	71	8	tc	1	1	0	0	0	0	0	0	0	0	0	0	0	0	0
20/08/2015	11:46:00	4320	12:00:00	2	71	8	cod	3	2	1	0	0	0	0	0	0	0	0	0	0	0	0
20/08/2015	11:47:00	4380	13:00:00	2	71	8	cod	4	3	0	0	0	0	0	0	1	0	0	0	0	0	0
20/08/2015	11:48:00	4440	14:00:00	2	71	8	cod	2	1	1	0	0	0	0	0	0	1	0	1	0	0	0
20/08/2015	11:49:00	4500	15:00:00	2	71	8	tc	1	1	0	0	0	0	0	0	0	0	0	0	0	0	0
20/08/2015	11:49:00	4500	15:00:00	2	71	8	cod	5	2	1	0	0	0	1	1	0	0	0	0	0	1	0
20/08/2015	11:50:00	4560	16:00:00	2	71	8	tc	1	1	0	0	0	0	0	0	0	0	0	0	0	0	0
20/08/2015	11:50:00	4560	16:00:00	2	71	8	cod	1	1	0	0	0	0	0	0	0	0	0	0	0	0	0
20/08/2015	11:51:00	4620	17:00:00	2	71	8	cod	3	1	0	0	0	1	0	1	0	0	0	0	0	0	0
20/08/2015	11:52:00	4680	18:00:00	2	71	8	cod	3	2	0	0	0	0	0	0	1	0	0	0	0	0	0
20/08/2015	11:53:00	4740	19:00:00	2	71	8	cod	2	2	0	0	0	0	0	0	0	0	0	0	0	0	0
20/08/2015	11:54:00	4800	20:00:00	2	71	8	cod	3	1	1	0	0	0	0	0	1	0	0	0	0	0	0
20/08/2015	11:55:00	4860	21:00:00	2	71	8	cod	3	3	0	0	0	0	0	0	0	0	0	0	0	0	0
20/08/2015	11:56:00	4920	22:00:00	2	71	8	cod	2	0	0	0	0	0	1	0	1	0	0	0	0	0	0
20/08/2015	11:57:00	4980	23:00:00	2	71	8	tc	1	0	0	0	0	0	0	0	1	0	0	0	0	0	0
20/08/2015	11:57:00	4980	23:00:00	2	71	8	cod	5	5	0	0	0	0	0	0	0	0	0	0	0	0	0
20/08/2015	11:58:00	5040	1 day, 0:00:00	2	71	8	tc	2	2	0	0	0	0	0	0	0	0	0	0	0	0	0
20/08/2015	11:58:00	5040	1 day, 0:00:00	2	71	8	cod	1	0	1	0	0	0	0	0	0	0	0	0	0	0	0
20/08/2015	11:59:00	5100	1 day, 1:00:00	2	71	8	cod	1	1	0	0	0	0	0	0	0	0	0	0	0	0	0
20/08/2015	12:00:00	5160	1 day, 2:00:00	2	71	8	cod	3	3	0	0	0	0	0	0	0	0	0	0	0	0	0
20/08/2015	12:01:00	5220	1 day, 3:00:00	2	71	8	tc	1	1	0	0	0	0	0	0	0	0	0	0	0	0	0
20/08/2015	12:01:00	5220	1 day, 3:00:00	2	71	8	cod	0	0	0	0	0	0	0	0	0	0	0	0	0	0	0
20/08/2015	12:02:00	5280	1 day, 4:00:00	2	71	8	cod	1	0	1	0	0	0	0	0	0	0	0	0	0	0	0
20/08/2015	12:03:00	5340	1 day, 5:00:00	2	71	8	cod	3	3	0	0	0	0	0	0	0	0	0	0	0	0	0
20/08/2015	12:04:00	5400	1 day, 6:00:00	2	71	8	tc	1	1	0	0	0	0	0	0	0	0	0	0	0	0	0
20/08/2015	12:04:00	5400	1 day, 6:00:00	2	71	8	cod	1	0	0	0	0	0	0	1	0	0	0	0	0	0	0
20/08/2015	12:05:00	5460	1:00:00	2	72	8	tc	1	1	0	0	0	0	0	0	0	0	0	0	0	0	0
20/08/2015	12:05:00	5520	1:00:00	2	72	8	cod	14	5	0	0	0	0	0	0	9	0	0	0	0	0	0
20/08/2015	12:06:00	5580	2:00:00	2	72	8	cod	22	7	4	0	0	0	0	1	10	0	0	0	0	0	0
20/08/2015	12:07:00	5640	3:00:00	2	72	8	tc	2	2	0	0	0	0	0	0	0	0	0	0	0	0	0
20/08/2015	12:07:00	5640	3:00:00	2	72	8	cod	8	4	0	0	0	0	0	0	4	0	0	0	0	0	0
20/08/2015	12:08:00	5700	4:00:00	2	72	8	cod	7	6	1	0	0	0	0	0	0	1	1	0	0	1	0
20/08/2015	12:09:00	5760	5:00:00	2	72	8	cod	8	5	2	0	0	0	0	0	1	0	0	0	0	0	0
20/08/2015	12:10:00	5820	6:00:00	2	72	8	cod	8	4	2	0	0	0	0	0	2	0	0	0	0	0	0
20/08/2015	12:11:00	5880	7:00:00	2	72	8	tc	1	0	0	0	0	0	0	0	1	0	0	0	0	0	0
20/08/2015	12:11:00	5940	7:00:00	2	72	8	cod	3	2	0	0	0	0	0	1	0	1	1	0	0	1	0
20/08/2015	12:12:00	6000	8:00:00	2	72	8	tc	0	0	0	0	0	0	0	0	0	1	1	0	0	0	0
20/08/2015	12:12:00	6000	8:00:00	2	72	8	cod	1	1	0	0	0	0	0	0	0	2	2	0	0	2	0
20/08/2015	12:13:00	6060	9:00:00	2	72	8	tc	1	0	0	0	0	0	0	1	0	0	0	0	0	0	0
20/08/2015	12:13:00	6060	9:00:00	2	72	8	cod	2	0	0	0	0	0	0	0	2	0	0	0	0	0	0
20/08/2015	12:14:00	6120	10:00:00	2	72	8	tc	0	0	0	0	0	0	0	0	0	0	0	0	1	0	0
20/08/2015	12:14:00	6120	10:00:00	2	72	8	cod	0	0	0	0	0	0	0	0	0	1	1	0	0	1	0
20/08/2015	12:15:00	6180	11:00:00	2	72	8	cod	1	0	0	0	0	0	0	1	0	0	0	0	0	0	0
20/08/2015	12:16:00	6240	12:00:00	2	72	8	tc	1	0	0	0	0	0	0	0	1	0	0	0	0	0	0
20/08/2015	12:16:00	6240	12:00:00	2	72	8	cod	2	1	0	0	0	0	0	0	1	1	1	0	0	1	0
20/08/2015	12:17:00	6300	13:00:00	2	72	8	cod	1	1	0	0	0	0	0	0	0	1	1	0	0	0	0
20/08/2015	12:18:00	6360	14:00:00	2	72	8	tc	0	0	0	0	0	0	0	0	0	1	1	0	0	0	0
20/08/2015	12:18:00	6360	14:00:00	2	72	8	cod	0	0	0	0	0	0	0	0	0	1	1	0	1	0	0
20/08/2015	12:19:00	6420	15:00:00	2	72	8	cod	0	0	0	0	0	0	0	0	0	2	2	0	0	2	0
20/08/2015	12:20:00	6480	16:00:00	2	72	8	tc	0	0	0	0	0	0	0	0	0	0	0	0	1	0	0
20/08/2015	12:20:00	6540	16:00:00	2	72	8	cod	0	0	0	0	0	0	0	0	0	0	0	0	0	1	0
20/08/2015	12:21:00	6600	17:00:00	2	72	8	cod	1	0	0	0	0	0	1	0	0	1	1	0	0	0	0
20/08/2015	12:22:00	6660	18:00:00	2	72	8	tc	1	0	0	0	0	0	0	1	0	0	0	0	0	0	0
20/08/2015	12:22:00	6660	18:00:00	2	72	8	cod	1	0	0	0	0	0	1	0	0	0	0	0	1	0	1
20/08/2015	12:23:00	6720	19:00:00	2	72	8	cod	3	1	0	0	1	0	0	1	0	1	1	0	0	1	0
20/08/2015	12:24:00	6780	20:00:00	2	72	8	cod	2	0	0	0	0	0	0	1	1	1	1	0	0	0	0
20/08/2015	12:25:00	6840	21:00:00	2	72	8	tc	0	0	0	0	0	0	0	0	0	1	1	0	0	0	0
20/08/2015	12:25:00	6840	21:00:00	2	72	8	cod	2	0	1	0	0	0	1	0	0	1	1	0	1	0	0
20/08/2015	12:26:00	6900	22:00:00	2	72	8	tc	0	0	0	0	0	0	0	0	0	0	0	0	1	0	0
20/08/2015	12:26:00	6900	22:00:00	2	72	8	cod	0	0	0	0	0	0	0	0	0	0	0	0	1	0	0
20/08/2015	12:27:00	6960	23:00:00	2	72	8	tc	2	2	0	0	0	0	0	0	0	0	0	0	0	0	0
20/08/2015	12:27:00	6960	23:00:00	2	72	8	cod	1	0	1	0	0	0	0	0	0	1	0	1	0	1	0
20/08/2015	12:28:00	7020	1 day, 0:00:00	2	72	8	cod	0	0	0	0	0	0	0	0	0	0	0	0	0	0	0
20/08/2015	12:29:00	7080	1 day, 1:00:00	2	72	8	cod	1	0	0	0	0	0	0	0	1	0	0	0	0	0	0
20/08/2015	12:30:00	7140	1 day, 2:00:00	2	72	8	cod	0	0	0	0	0	0	0	0	0	0	0	0	0	0	0
20/08/2015	12:30:00	7140	1 day, 2:00:00	2	72	8	tc	1	0	0	0	0	0	0	1	0	0	0	0	0	0	0
20/08/2015	12:31:00	7200	1 day, 3:00:00	2	72	8	cod	1	0	0	0	0	0	1	0	0	0	0	0	0	0	0
20/08/2015	12:32:00	7260	1 day, 4:00:00	2	72	8	cod	1	0	0	0	0	0	0	1	0	0	0	0	0	0	0
20/08/2015	12:33:00	7320	1 day, 5:00:00	2	72	8	sculpin	1	0	0	0	1	0	0	0	0	0	0	0	0	0	0
20/08/2015	12:33:00	7320	1 day, 5:00:00	2	72	8	cod	2	1	1	0	0	0	0	0	0	1	0	1	0	0	0
20/08/2015	12:34:00	7380	1 day, 6:00:00	2	72	8	cod	0	0	0	0	0	0	0	0	0	0	0	0	0	1	0
20/08/2015	12:35:00	7440	1:00:00	2	73	1	cod	1	0	0	0	0	1	0	0	0	0	0	0	0	0	0
20/08/2015	12:36:00	7500	2:00:00	2	73	1	cod	0	0	0	0	0	0	0	0	0	0	0	0	0	0	0
20/08/2015	12:37:00	7560	3:00:00	2	73	1	cod	1	0	0	0	0	0	0	0	1	1	1	0	1	0	1
20/08/2015	12:37:00	7560	3:00:00	2	73	1	tc	1	0	0	0	0	0	0	0	1	0	0	0	0	0	0
20/08/2015	12:38:00	7620	4:00:00	2	73	1	cod	3	0	1	0	0	0	1	0	1	0	0	0	0	0	0
20/08/2015	12:39:00	7680	5:00:00	2	73	1	cod	4	3	0	0	0	0	1	0	0	0	0	0	0	0	1
20/08/2015	12:40:00	7740	6:00:00	2	73	1	cod	3	1	1	0	0	0	1	0	0	0	0	0	0	0	0
20/08/2015	12:41:00	7800	7:00:00	2	73	1	cod	3	2	0	0	0	0	0	0	1	0	0	0	0	0	0
20/08/2015	12:42:00	7860	8:00:00	2	73	1	cod	4	0	0	0	0	0	0	2	2	1	1	0	0	0	0
20/08/2015	12:43:00	7920	9:00:00	2	73	1	cod	2	1	0	0	0	0	0	0	1	2	0	2	0	1	0
20/08/2015	12:44:00	7980	10:00:00	2	73	1	cod	0	0	0	0	0	0	0	0	0	1	0	1	0	3	0
20/08/2015	12:45:00	8040	11:00:00	2	73	1	cod	5	2	2	0	0	0	0	0	1	0	0	0	0	0	0
20/08/2015	12:46:00	8100	12:00:00	2	73	1	cod	2	0	0	0	0	1	1	0	0	1	1	0	0	1	0
20/08/2015	12:47:00	8160	13:00:00	2	73	1	cod	6	1	1	0	2	0	1	0	1	0	0	0	0	0	0
20/08/2015	12:48:00	8220	14:00:00	2	73	1	cod	0	0	0	0	0	0	0	0	0	1	0	1	0	1	0
20/08/2015	12:49:00	8280	15:00:00	2	73	1	tc	1	0	0	0	0	0	0	0	1	0	0	0	0	0	0
20/08/2015	12:49:00	8280	15:00:00	2	73	1	cod	3	1	0	0	0	0	0	0	2	0	0	0	0	0	0
20/08/2015	12:50:00	8340	16:00:00	2	73	1	tc	1	1	0	0	0	0	0	0	0	0	0	0	0	0	0
20/08/2015	12:50:00	8340	16:00:00	2	73	1	cod	6	2	3	0	0	0	0	0	1	0	0	0	0	0	0
20/08/2015	12:51:00	8400	17:00:00	2	73	1	tc	1	0	1	0	0	0	0	0	0	0	0	0	0	0	0
20/08/2015	12:51:00	8400	17:00:00	2	73	1	cod	3	0	2	0	1	0	0	0	0	1	0	1	1	0	0
20/08/2015	12:52:00	8460	18:00:00	2	73	1	cod	2	0	1	0	0	0	1	0	0	1	0	1	0	1	0
20/08/2015	12:53:00	8520	19:00:00	2	73	1	cod	6	1	1	0	1	1	1	0	1	0	0	0	0	0	0
20/08/2015	12:54:00	8580	20:00:00	2	73	1	cod	12	0	3	0	2	0	3	0	4	4	2	2	1	2	0
20/08/2015	12:55:00	8640	21:00:00	2	73	1	tc	1	0	0	0	0	0	1	0	0	0	0	0	0	0	0
20/08/2015	12:55:00	8640	21:00:00	2	73	1	cod	3	1	0	0	0	0	1	1	0	0	0	0	0	1	0
20/08/2015	12:56:00	8700	22:00:00	2	73	1	cod	18	6	6	0	0	0	0	1	5	0	0	0	0	0	0
20/08/2015	12:57:00	8760	23:00:00	2	73	1	cod	16	7	1	1	2	0	0	2	3	0	0	0	0	0	0
20/08/2015	12:58:00	8820	1 day, 0:00:00	2	73	1	cod	2	0	0	0	0	0	0	1	1	1	1	0	0	1	0
20/08/2015	12:59:00	8880	1 day, 1:00:00	2	73	1	tc	1	1	0	0	0	0	0	0	0	0	0	0	0	0	0
20/08/2015	12:59:00	8940	1 day, 1:00:00	2	73	1	cod	14	4	5	0	0	0	0	2	3	0	0	0	0	0	0
20/08/2015	13:00:00	9000	1 day, 2:00:00	2	73	1	cod	8	3	3	0	0	0	0	0	2	0	0	0	0	0	0
20/08/2015	13:01:00	9060	1 day, 3:00:00	2	73	1	tc	2	2	0	0	0	0	0	0	0	0	0	0	0	0	0	Jellyfish blocking view
20/08/2015	13:01:00	9120	1 day, 3:00:00	2	73	1	cod	5	2	0	0	0	0	0	0	3	0	0	0	0	0	0
20/08/2015	13:02:00	9180	1 day, 4:00:00	2	73	1	cod	0	0	0	0	0	0	0	0	0	0	0	0	0	0	0
20/08/2015	13:03:00	9240	1 day, 5:00:00	2	73	1	cod	1	1	0	0	0	0	0	0	0	0	0	0	0	0	0
20/08/2015	13:04:00	9300	1 day, 6:00:00	2	73	1	tc	1	0	0	0	0	0	0	0	0	0	0	0	0	0	0
20/08/2015	13:04:00	9360	1 day, 6:00:00	2	73	1	cod	4	3	1	0	0	0	0	0	0	0	0	0	0	0	0
20/08/2015	13:05:00	9420	1:00:00	2	74	1	cod	7	5	0	0	0	0	0	0	2	0	0	0	0	0	0
20/08/2015	13:06:00	9480	2:00:00	2	74	1	cod	3	1	0	0	1	0	0	1	0	1	1	0	0	0	0
20/08/2015	13:07:00	9540	3:00:00	2	74	1	cod	3	1	0	0	0	1	1	0	0	2	2	0	0	2	0
20/08/2015	13:08:00	9600	4:00:00	2	74	1	cod	2	0	0	0	0	0	0	2	0	1	1	0	1	1	0
20/08/2015	13:09:00	9660	5:00:00	2	74	1	cod	2	0	0	0	1	0	0	1	0	0	0	0	0	0	0
20/08/2015	13:10:00	9720	6:00:00	2	74	1	tc	1	0	0	0	0	0	0	1	0	0	0	0	0	0	0
20/08/2015	13:10:00	9720	6:00:00	2	74	1	cod	1	0	0	0	0	1	0	0	0	0	0	0	0	0	0
20/08/2015	13:11:00	9780	7:00:00	2	74	2	cod	1	0	0	0	0	0	1	0	0	0	0	0	0	0	0	water direction change
20/08/2015	13:12:00	9840	8:00:00	2	74	2	cod	3	1	0	0	0	2	0	0	0	0	0	0	0	0	0
20/08/2015	13:13:00	9900	9:00:00	2	74	2	cod	3	1	1	0	0	0	1	0	0	0	0	0	0	0	0
20/08/2015	13:14:00	9960	10:00:00	2	74	2	cod	1	0	1	0	0	0	0	0	0	0	0	0	0	0	0	10 min video
20/08/2015	13:15:00	10020	1:00:00	2	75	2	cod	4	1	0	0	1	0	2	0	0	0	0	0	0	0	0
20/08/2015	13:16:00	10080	2:00:00	2	75	2	cod	8	0	1	0	1	1	0	1	4	0	0	0	0	0	0
20/08/2015	13:17:00	10140	3:00:00	2	75	2	cod	7	0	2	0	0	3	1	0	1	0	0	0	0	0	0
20/08/2015	13:18:00	10200	4:00:00	2	75	2	cod	8	0	2	2	1	3	0	0	0	2	1	1	1	1	0
20/08/2015	13:19:00	10260	5:00:00	2	75	2	cod	7	2	2	2	0	0	0	1	0	1	0	1	1	0	0
20/08/2015	13:20:00	10320	6:00:00	2	75	2	cod	15	5	5	1	4	0	0	0	0	0	0	0	0	0	0
20/08/2015	13:21:00	10380	7:00:00	2	75	2	cod	11	2	2	1	2	0	2	2	0	0	0	0	0	0	0
20/08/2015	13:22:00	10440	8:00:00	2	75	2	cod	10	4	0	0	1	1	2	0	2	0	0	0	0	0	0
20/08/2015	13:23:00	10500	9:00:00	2	75	2	cod	11	3	4	1	2	0	0	1	0	0	0	0	0	0	0
20/08/2015	13:24:00	10560	10:00:00	2	75	2	cod	15	6	0	0	4	3	1	0	1	1	1	0	1	0	0
20/08/2015	13:25:00	10620	11:00:00	2	75	2	cod	10	0	0	0	5	3	0	1	1	0	0	0	0	0	0
20/08/2015	13:26:00	10680	12:00:00	2	75	2	cod	6	1	4	0	0	0	1	0	0	0	0	0	0	0	0
20/08/2015	13:27:00	10740	13:00:00	2	75	2	cod	8	0	2	0	2	1	1	1	1	0	0	0	0	0	0
20/08/2015	13:28:00	10800	14:00:00	2	75	2	cod	15	2	3	0	0	6	4	0	0	0	0	0	0	0	0
20/08/2015	13:29:00	10860	15:00:00	2	75	2	cod	13	2	5	0	0	6	0	0	0	0	0	0	0	0	0
20/08/2015	13:30:00	10920	16:00:00	2	75	3	cod	6	2	0	0	0	2	1	0	1	0	0	0	0	0	0
20/08/2015	13:31:00	10980	17:00:00	2	75	3	cod	9	1	5	0	0	0	2	0	1	0	0	0	0	0	0
20/08/2015	13:32:00	11040	18:00:00	2	75	3	cod	4	0	1	0	0	2	0	1	0	1	0	1	0	0	0
20/08/2015	13:33:00	11100	19:00:00	2	75	3	cod	8	0	1	0	0	2	5	0	0	0	0	0	0	1	0
20/08/2015	13:34:00	11160	20:00:00	2	75	3	cod	4	0	0	0	2	1	1	0	0	0	0	0	0	0	0
20/08/2015	13:35:00	11220	21:00:00	2	75	3	cod	7	1	0	0	1	3	1	0	1	1	1	0	0	1	0
20/08/2015	13:36:00	11280	22:00:00	2	75	3	cod	2	0	0	0	1	1	0	0	0	1	0	1	0	1	0
20/08/2015	13:37:00	11340	23:00:00	2	75	3	cod	4	1	1	0	0	0	1	0	1	0	0	0	0	0	0
20/08/2015	13:38:00	11400	1 day, 0:00:00	2	75	3	cod	3	1	0	0	0	1	1	0	0	0	0	0	0	0	0
20/08/2015	13:39:00	11460	1 day, 1:00:00	2	75	3	cod	2	0	1	0	0	1	0	0	0	0	0	0	0	0	0
20/08/2015	13:40:00	11520	1 day, 2:00:00	2	75	3	cod	3	0	0	0	1	1	0	0	1	1	0	1	0	0	0
20/08/2015	13:41:00	11580	1 day, 3:00:00	2	75	3	cod	3	0	0	0	1	1	1	0	0	0	0	0	0	1	0
20/08/2015	13:42:00	11640	1 day, 4:00:00	2	75	4	cod	3	0	1	0	0	1	1	0	0	0	0	0	0	0	0
20/08/2015	13:43:00	11700	1 day, 5:00:00	2	75	4	tc	1	0	0	0	0	1	0	0	0	0	0	0	0	0	0
20/08/2015	13:43:00	11700	1 day, 5:00:00	2	75	4	cod	5	0	0	0	1	3	0	0	1	0	0	0	0	0	0
20/08/2015	13:44:00	11760	1 day, 6:00:00	2	75	4	cod	2	0	0	0	0	2	0	0	0	0	0	0	0	0	0
20/08/2015	13:45:00	11820	1:00:00	2	76	4	cod	2	0	0	0	0	1	0	0	1	0	0	0	0	0	0
20/08/2015	13:46:00	11880	2:00:00	2	76	4	cod	3	0	0	0	1	1	1	0	0	0	0	0	0	0	0
20/08/2015	13:47:00	11940	3:00:00	2	76	4	cod	6	1	1	0	1	1	1	0	1	0	0	0	0	0	0
20/08/2015	13:48:00	12000	4:00:00	2	76	4	cod	4	0	0	0	0	1	1	2	0	1	1	0	0	0	0
20/08/2015	13:49:00	12060	5:00:00	2	76	4	cod	9	0	1	4	1	1	2	0	0	0	0	0	1	0	0
20/08/2015	13:50:00	12120	6:00:00	2	76	4	cod	10	0	2	3	0	1	4	0	0	0	0	0	0	0	0
20/08/2015	13:51:00	12180	7:00:00	2	76	4	cod	20	0	3	2	3	1	6	3	2	0	0	0	0	0	0
20/08/2015	13:52:00	12240	8:00:00	2	76	4	cod	6	0	0	0	0	2	3	1	0	1	1	0	0	1	0
20/08/2015	13:53:00	12300	9:00:00	2	76	4	cod	14	0	2	3	5	3	1	0	0	0	0	0	0	0	0
20/08/2015	13:54:00	12360	10:00:00	2	76	4	cod	10	1	2	0	2	3	0	1	1	0	0	0	0	0	0
20/08/2015	13:55:00	12420	11:00:00	2	76	4	cod	9	0	1	0	0	2	2	3	1	0	0	0	0	0	0
20/08/2015	13:56:00	12480	12:00:00	2	76	4	cod	5	0	1	1	0	0	2	1	0	1	1	0	0	0	0
20/08/2015	13:57:00	12540	13:00:00	2	76	4	cod	7	0	0	0	0	1	5	0	1	0	0	0	1	0	0
20/08/2015	13:58:00	12600	14:00:00	2	76	4	cod	8	0	0	0	2	4	1	1	0	0	0	0	0	0	0
20/08/2015	13:59:00	12660	15:00:00	2	76	4	tc	2	0	0	0	0	2	0	0	0	0	0	0	0	0	0
20/08/2015	13:59:00	12720	15:00:00	2	76	4	cod	12	1	0	0	2	2	2	4	1	2	1	1	0	1	0
20/08/2015	14:00:00	12780	16:00:00	2	76	4	cod	9	0	0	0	1	4	3	1	0	1	1	0	0	2	0
20/08/2015	14:01:00	12840	17:00:00	2	76	4	cod	8	0	1	0	1	3	2	0	1	1	1	0	0	1	0
20/08/2015	14:02:00	12900	18:00:00	2	76	4	cod	7	1	0	0	0	1	3	1	1	1	1	0	0	1	0
20/08/2015	14:03:00	12960	19:00:00	2	76	4	cod	6	1	1	0	1	1	1	0	1	0	0	0	0	0	0
20/08/2015	14:04:00	13020	20:00:00	2	76	4	tc	1	1	0	0	0	0	0	0	0	0	0	0	0	0	0
20/08/2015	14:04:00	13080	20:00:00	2	76	4	cod	4	1	0	0	1	1	1	0	0	1	0	1	1	0	0
20/08/2015	14:05:00	13140	21:00:00	2	76	4	cod	5	0	0	0	2	2	1	0	0	0	0	0	0	0	1	Big Fish Escape
20/08/2015	14:06:00	13200	22:00:00	2	76	4	cod	7	0	0	1	1	5	0	0	0	0	0	0	0	0	0
20/08/2015	14:07:00	13260	23:00:00	2	76	4	cod	2	0	1	0	0	0	1	0	0	1	0	1	0	0	0
20/08/2015	14:08:00	13320	1 day, 0:00:00	2	76	4	cod	2	0	0	0	0	2	0	0	0	0	0	0	0	0	0
20/08/2015	14:09:00	13380	1 day, 1:00:00	2	76	4	tc	1	0	0	0	1	0	0	0	0	0	0	0	0	0	0
20/08/2015	14:09:00	13440	1 day, 1:00:00	2	76	4	cod	6	0	1	1	1	3	0	0	0	0	0	0	0	0	0
20/08/2015	14:10:00	13500	1 day, 2:00:00	2	76	4	cod	5	0	0	1	1	1	1	0	1	0	0	0	0	0	0
20/08/2015	14:11:00	13560	1 day, 3:00:00	2	76	4	cod	5	0	0	0	1	0	2	1	1	0	0	0	0	0	0
20/08/2015	14:12:00	13620	1 day, 4:00:00	2	76	4	tc	1	0	0	0	0	1	0	0	0	0	0	0	0	0	0
20/08/2015	14:12:00	13620	1 day, 4:00:00	2	76	4	cod	6	0	1	1	1	1	2	0	0	0	0	0	0	0	0
20/08/2015	14:13:00	13680	1 day, 5:00:00	2	76	4	cod	2	0	0	0	0	2	0	0	0	0	0	0	0	0	0
20/08/2015	14:14:00	13740	1 day, 6:00:00	2	76	4	cod	3	0	0	0	0	1	2	0	0	0	0	0	0	0	0
20/08/2015	14:15:00	13800	1:00:00	2	77	4	cod	2	0	0	0	0	2	0	0	0	0	0	0	0	0	0
20/08/2015	14:16:00	13860	2:00:00	2	77	4	cod	2	0	0	0	0	2	0	0	0	0	0	0	0	0	0
20/08/2015	14:17:00	13920	3:00:00	2	77	4	tc	1	0	0	0	0	1	0	0	0	0	0	0	0	0	0
20/08/2015	14:17:00	13920	3:00:00	2	77	4	cod	3	0	0	0	0	2	1	0	0	0	0	0	0	0	0
20/08/2015	14:18:00	13980	4:00:00	2	77	4	cod	3	0	0	0	0	2	1	0	0	0	0	0	0	0	0
20/08/2015	14:19:00	14040	5:00:00	2	77	4	cod	1	0	0	0	0	0	1	0	0	0	0	0	0	0	0
20/08/2015	14:20:00	14100	6:00:00	2	77	4	cod	3	0	0	0	0	3	0	0	0	0	0	0	0	0	0
20/08/2015	14:21:00	14160	7:00:00	2	77	4	cod	1	0	0	0	0	1	0	0	0	0	0	0	0	0	0
20/08/2015	14:22:00	14220	8:00:00	2	77	4	cod	1	0	0	0	0	1	0	0	0	0	0	0	0	0	0
20/08/2015	14:23:00	14280	9:00:00	2	77	4	tc	1	0	0	0	0	1	0	0	0	0	0	0	0	0	0
20/08/2015	14:23:00	14280	9:00:00	2	77	4	cod	1	0	0	0	0	1	0	0	0	0	0	0	0	0	0
20/08/2015	14:24:00	14340	10:00:00	2	77	4	cod	1	0	0	0	0	1	0	0	0	1	0	1	0	0	0
20/08/2015	14:25:00	14400	11:00:00	2	77	4	cod	2	0	0	0	1	1	0	0	0	0	0	0	0	1	0
20/08/2015	14:26:00	14460	12:00:00	2	77	4	cod	3	0	0	0	0	3	0	0	0	0	0	0	0	0	0
20/08/2015	14:27:00	14520	13:00:00	2	77	4	cod	3	0	0	0	0	2	1	0	0	0	0	0	0	0	0
20/08/2015	14:28:00	14580	14:00:00	2	77	4	tc	1	0	0	0	0	1	0	0	0	0	0	0	0	0	0
20/08/2015	14:28:00	14580	14:00:00	2	77	4	cod	4	0	0	0	0	2	2	0	0	0	0	0	0	0	0
20/08/2015	14:29:00	14640	15:00:00	2	77	4	cod	0	0	0	0	0	0	0	0	0	0	0	0	0	0	0
20/08/2015	14:30:00	14700	16:00:00	2	77	4	cod	4	1	0	0	0	2	0	0	1	0	0	0	0	0	0
20/08/2015	14:31:00	14760	17:00:00	2	77	4	cod	3	0	0	0	0	3	0	0	0	0	0	0	0	0	0
20/08/2015	14:32:00	14820	18:00:00	2	77	4	cod	3	0	0	0	1	1	1	0	0	0	0	0	0	0	0
20/08/2015	14:33:00	14880	19:00:00	2	77	4	cod	2	0	0	0	0	2	0	0	0	0	0	0	0	0	0
20/08/2015	14:34:00	14940	20:00:00	2	77	4	cod	6	0	0	0	0	6	0	0	0	0	0	0	0	0	0
20/08/2015	14:35:00	15000	21:00:00	2	77	4	cod	1	0	0	0	0	1	0	0	0	0	0	0	0	0	0
20/08/2015	14:36:00	15060	22:00:00	2	77	4	cod	1	0	0	0	0	1	0	0	0	1	0	1	1	0	0
20/08/2015	14:37:00	15120	23:00:00	2	77	4	cod	2	0	0	0	0	2	0	0	0	0	0	0	0	0	0
20/08/2015	14:38:00	15180	1 day, 0:00:00	2	77	4	cod	4	0	0	0	1	2	0	1	0	0	0	0	0	0	0
20/08/2015	14:39:00	15240	1 day, 1:00:00	2	77	4	cod	3	0	1	0	0	1	1	0	0	0	0	0	0	0	0
20/08/2015	14:40:00	15300	1 day, 2:00:00	2	77	4	cod	1	0	0	0	0	1	0	0	0	0	0	0	0	0	0
20/08/2015	14:41:00	15360	1 day, 3:00:00	2	77	4	cod	4	0	0	0	1	1	2	0	0	0	0	0	0	0	0
20/08/2015	14:42:00	15420	1 day, 4:00:00	2	77	4	cod	1	0	0	0	0	1	0	0	0	0	0	0	0	0	0
20/08/2015	14:43:00	15480	1 day, 5:00:00	2	77	4	cod	2	0	0	0	1	1	0	0	0	0	0	0	0	0	0
20/08/2015	14:44:00	15540	1 day, 6:00:00	2	77	4	cod	1	0	0	0	0	0	1	0	0	0	0	0	0	0	0
20/08/2015	14:45:00	15600	1:00:00	2	78	4	cod	2	0	0	0	0	1	1	0	0	0	0	0	0	0	0
20/08/2015	14:46:00	15660	2:00:00	2	78	4	cod	1	0	0	0	0	1	0	0	0	0	0	0	0	0	0
20/08/2015	14:47:00	15720	3:00:00	2	78	4	cod	0	0	0	0	0	0	0	0	0	0	0	0	0	0	0
20/08/2015	14:48:00	15780	4:00:00	2	78	4	cod	3	0	0	1	0	2	0	0	0	0	0	0	0	0	0
20/08/2015	14:49:00	15840	5:00:00	2	78	4	cod	1	0	0	0	0	1	0	0	0	0	0	0	0	0	0
20/08/2015	14:50:00	15900	6:00:00	2	78	4	tc	1	0	0	0	0	1	0	0	0	0	0	0	0	0	0
20/08/2015	14:50:00	15960	6:00:00	2	78	4	cod	1	0	0	0	0	1	0	0	0	0	0	0	0	0	0
20/08/2015	14:51:00	16020	7:00:00	2	78	4	cod	2	0	0	0	0	2	0	0	0	0	0	0	0	0	0
20/08/2015	14:52:00	16080	8:00:00	2	78	4	cod	0	0	0	0	0	0	0	0	0	0	0	0	0	0	0
20/08/2015	14:53:00	16140	9:00:00	2	78	4	cod	0	0	0	0	0	0	0	0	0	0	0	0	0	0	0
20/08/2015	14:54:00	16200	10:00:00	2	78	4	cod	2	0	0	0	0	1	1	0	0	0	0	0	0	0	0
20/08/2015	14:55:00	16260	11:00:00	2	78	4	cod	0	0	0	0	0	0	0	0	0	0	0	0	0	0	0
20/08/2015	14:56:00	16320	12:00:00	2	78	4	cod	1	0	0	0	0	1	0	0	0	0	0	0	0	0	0
20/08/2015	14:57:00	16380	13:00:00	2	78	4	cod	0	0	0	0	0	0	0	0	0	0	0	0	0	0	0
20/08/2015	14:58:00	16440	14:00:00	2	78	4	cod	0	0	0	0	0	0	0	0	0	1	0	1	1	0	0
20/08/2015	14:59:00	16500	15:00:00	2	78	4	cod	1	0	0	0	0	1	0	0	0	0	0	0	0	0	1
20/08/2015	15:00:00	16560	16:00:00	2	78	4	cod	0	0	0	0	0	0	0	0	0	0	0	0	0	0	0
20/08/2015	15:01:00	16620	17:00:00	2	78	4	cod	0	0	0	0	0	0	0	0	0	0	0	0	0	0	0
20/08/2015	15:02:00	16680	18:00:00	2	78	4	tc	1	0	0	0	0	1	0	0	0	0	0	0	0	0	0
20/08/2015	15:02:00	16680	18:00:00	2	78	4	cod	0	0	0	0	0	0	0	0	0	0	0	0	0	0	0
20/08/2015	15:03:00	16740	19:00:00	2	78	4	cod	1	0	0	0	0	1	0	0	0	0	0	0	0	0	0
20/08/2015	15:04:00	16800	20:00:00	2	78	4	cod	1	0	0	0	0	0	1	0	0	0	0	0	0	0	0
20/08/2015	15:05:00	16860	21:00:00	2	78	4	tc	1	0	0	0	0	0	1	0	0	0	0	0	0	0	0
20/08/2015	15:05:00	16860	21:00:00	2	78	4	cod	0	0	0	0	0	0	0	0	0	0	0	0	0	0	0
20/08/2015	15:06:00	16920	22:00:00	2	78	4	cod	0	0	0	0	0	0	0	0	0	0	0	0	0	0	0
20/08/2015	15:07:00	16980	23:00:00	2	78	4	cod	1	0	0	0	0	1	0	0	0	0	0	0	0	0	0
20/08/2015	15:08:00	17040	1 day, 0:00:00	2	78	4	cod	0	0	0	0	0	0	0	0	0	0	0	0	0	0	0
20/08/2015	15:09:00	17100	1 day, 1:00:00	2	78	4	cod	1	0	0	0	0	1	0	0	0	0	0	0	0	0	0
20/08/2015	15:10:00	17160	1 day, 2:00:00	2	78	4	cod	0	0	0	0	0	0	0	0	0	0	0	0	0	0	0
20/08/2015	15:11:00	17220	1 day, 3:00:00	2	78	4	cod	0	0	0	0	0	0	0	0	0	0	0	0	0	0	0
20/08/2015	15:12:00	17280	1 day, 4:00:00	2	78	4	cod	0	0	0	0	0	0	0	0	0	0	0	0	0	0	0
20/08/2015	15:13:00	17340	1 day, 5:00:00	2	78	4	cod	1	0	0	0	0	1	0	0	0	0	0	0	0	0	0
20/08/2015	15:14:00	17400	1 day, 6:00:00	2	78	4	cod	0	0	0	0	0	0	0	0	0	0	0	0	0	0	0
20/08/2015	15:15:00	17460	1:00:00	2	79	5	cod	1	0	0	0	0	1	0	0	0	0	0	0	0	0	0
20/08/2015	15:16:00	17520	2:00:00	2	79	5	cod	1	0	0	0	0	0	1	0	0	0	0	0	0	0	0
20/08/2015	15:17:00	17580	3:00:00	2	79	5	cod	0	0	0	0	0	0	0	0	0	0	0	0	0	0	0
20/08/2015	15:18:00	17640	4:00:00	2	79	5	tc	1	0	0	0	0	1	0	0	0	0	0	0	0	0	0
20/08/2015	15:18:00	17640	4:00:00	2	79	5	cod	0	0	0	0	0	0	0	0	0	0	0	0	0	0	0
20/08/2015	15:19:00	17700	5:00:00	2	79	5	cod	1	0	0	0	0	1	0	0	0	0	0	0	0	0	0
20/08/2015	15:20:00	17760	6:00:00	2	79	5	cod	1	0	0	0	0	1	0	0	0	0	0	0	0	0	0
20/08/2015	15:21:00	17820	7:00:00	2	79	5	cod	1	0	0	0	0	1	0	0	0	0	0	0	0	0	0
20/08/2015	15:22:00	17880	8:00:00	2	79	5	flatfish	1	0	0	0	1	0	0	0	0	0	0	0	0	0	0
20/08/2015	15:22:00	17880	8:00:00	2	79	5	cod	1	0	0	0	0	1	0	0	0	0	0	0	0	0	0
20/08/2015	15:23:00	17940	9:00:00	2	79	5	tc	1	0	0	0	0	1	0	0	0	0	0	0	0	0	0
20/08/2015	15:23:00	17940	9:00:00	2	79	5	cod	1	0	0	0	0	1	0	0	0	0	0	0	0	0	0
20/08/2015	15:24:00	18000	10:00:00	2	79	5	flatfish	1	0	0	0	1	0	0	0	0	0	0	0	0	0	0
20/08/2015	15:24:00	18000	10:00:00	2	79	5	cod	0	0	0	0	0	0	0	0	0	0	0	0	0	0	0
20/08/2015	15:25:00	18060	11:00:00	2	79	5	tc	1	0	0	0	1	0	0	0	0	0	0	0	0	0	0
20/08/2015	15:25:00	18060	11:00:00	2	79	5	cod	0	0	0	0	0	0	0	0	0	0	0	0	0	0	0
20/08/2015	15:26:00	18120	12:00:00	2	79	5	cod	0	0	0	0	0	0	0	0	0	0	0	0	0	0	0
20/08/2015	15:27:00	18180	13:00:00	2	79	5	cod	0	0	0	0	0	0	0	0	0	0	0	0	0	0	0
20/08/2015	15:28:00	18240	14:00:00	2	79	5	cod	0	0	0	0	0	0	0	0	0	0	0	0	0	0	0
20/08/2015	15:29:00	18300	15:00:00	2	79	5	cod	0	0	0	0	0	0	0	0	0	0	0	0	0	0	0
20/08/2015	15:30:00	18360	16:00:00	2	79	5	cod	0	0	0	0	0	0	0	0	0	0	0	0	0	0	0
20/08/2015	15:31:00	18420	17:00:00	2	79	5	cod	0	0	0	0	0	0	0	0	0	0	0	0	0	0	0
20/08/2015	15:32:00	18480	18:00:00	2	79	5	cod	0	0	0	0	0	0	0	0	0	0	0	0	0	0	0
20/08/2015	15:33:00	18540	19:00:00	2	79	5	cod	0	0	0	0	0	0	0	0	0	0	0	0	0	0	0
20/08/2015	15:34:00	18600	20:00:00	2	79	5	cod	0	0	0	0	0	0	0	0	0	0	0	0	0	0	0
20/08/2015	15:35:00	18660	21:00:00	2	79	5	cod	0	0	0	0	0	0	0	0	0	0	0	0	0	0	0
20/08/2015	15:36:00	18720	22:00:00	2	79	5	cod	1	0	0	0	0	1	0	0	0	0	0	0	0	0	0
20/08/2015	15:37:00	18780	23:00:00	2	79	5	cod	0	0	0	0	0	0	0	0	0	0	0	0	0	0	0
20/08/2015	15:38:00	18840	1 day, 0:00:00	2	79	5	cod	1	0	1	0	0	0	0	0	0	0	0	0	0	0	0
20/08/2015	15:39:00	18900	1 day, 1:00:00	2	79	5	cod	1	1	0	0	0	0	0	0	0	0	0	0	0	0	0
20/08/2015	15:40:00	18960	1 day, 2:00:00	2	79	5	cod	1	0	0	0	0	1	0	0	0	0	0	0	0	0	0
20/08/2015	15:41:00	19020	1 day, 3:00:00	2	79	5	cod	1	1	0	0	0	0	0	0	0	0	0	0	0	0	0
20/08/2015	15:42:00	19080	1 day, 4:00:00	2	79	5	cod	1	0	0	0	0	1	0	0	0	0	0	0	0	0	0
20/08/2015	15:43:00	19140	1 day, 5:00:00	2	79	5	cod	0	0	0	0	0	0	0	0	0	0	0	0	0	0	0
20/08/2015	15:44:00	19200	1 day, 6:00:00	2	79	5	cod	0	0	0	0	0	0	0	0	0	0	0	0	0	0	0
20/08/2015	15:45:00	19260	1:00:00	2	80	5	cod	1	1	0	0	0	0	0	0	0	0	0	0	0	0	0
20/08/2015	15:46:00	19320	2:00:00	2	80	5	cod	0	0	0	0	0	0	0	0	0	0	0	0	0	0	0
20/08/2015	15:47:00	19380	3:00:00	2	80	5	cod	1	0	1	0	0	0	0	0	0	0	0	0	0	0	0
20/08/2015	15:48:00	19440	4:00:00	2	80	5	cod	0	0	0	0	0	0	0	0	0	0	0	0	0	0	0
20/08/2015	15:49:00	19500	5:00:00	2	80	5	cod	0	0	0	0	0	0	0	0	0	0	0	0	0	0	0
20/08/2015	15:50:00	19560	6:00:00	2	80	5	cod	0	0	0	0	0	0	0	0	0	0	0	0	0	0	0
20/08/2015	15:51:00	19620	7:00:00	2	80	5	cod	0	0	0	0	0	0	0	0	0	0	0	0	0	0	0
20/08/2015	15:52:00	19680	8:00:00	2	80	5	cod	0	0	0	0	0	0	0	0	0	0	0	0	0	0	0
20/08/2015	15:53:00	19740	9:00:00	2	80	5	cod	0	0	0	0	0	0	0	0	0	0	0	0	0	0	0	9 Min Video
20/08/2015	15:54:00	19800	1:00:00	2	81	5	cod	0	0	0	0	0	0	0	0	0	0	0	0	0	0	0
20/08/2015	15:55:00	19860	2:00:00	2	81	5	cod	0	0	0	0	0	0	0	0	0	0	0	0	0	0	0
20/08/2015	15:56:00	19920	3:00:00	2	81	6	cod	0	0	0	0	0	0	0	0	0	0	0	0	0	0	0
20/08/2015	15:57:00	19980	4:00:00	2	81	6	cod	0	0	0	0	0	0	0	0	0	0	0	0	0	0	0
20/08/2015	15:58:00	20040	5:00:00	2	81	6	cod	0	0	0	0	0	0	0	0	0	0	0	0	0	0	0
20/08/2015	15:59:00	20100	6:00:00	2	81	6	cod	0	0	0	0	0	0	0	0	0	0	0	0	0	0	0
20/08/2015	16:00:00	20160	7:00:00	2	81	7	cod	0	0	0	0	0	0	0	0	0	0	0	0	0	0	0
20/08/2015	16:01:00	20220	8:00:00	2	81	7	cod	0	0	0	0	0	0	0	0	0	0	0	0	0	0	0
20/08/2015	16:02:00	20280	9:00:00	2	81	7	cod	0	0	0	0	0	0	0	0	0	0	0	0	0	0	0
20/08/2015	16:03:00	20340	10:00:00	2	81	7	cod	0	0	0	0	0	0	0	0	0	0	0	0	0	0	0
20/08/2015	16:04:00	20400	11:00:00	2	81	7	cod	0	0	0	0	0	0	0	0	0	0	0	0	0	0	0
20/08/2015	16:05:00	20460	12:00:00	2	81	7	cod	0	0	0	0	0	0	0	0	0	0	0	0	0	0	0
20/08/2015	16:06:00	20520	13:00:00	2	81	7	tc	1	0	0	0	0	0	0	0	1	0	0	0	0	0	0
20/08/2015	16:06:00	20520	13:00:00	2	81	7	cod	0	0	0	0	0	0	0	0	0	0	0	0	0	0	0
20/08/2015	16:07:00	20580	14:00:00	2	81	7	cod	0	0	0	0	0	0	0	0	0	0	0	0	0	0	0
20/08/2015	16:08:00	20640	15:00:00	2	81	7	cod	0	0	0	0	0	0	0	0	0	0	0	0	0	0	0
20/08/2015	16:09:00	20700	16:00:00	2	81	7	cod	0	0	0	0	0	0	0	0	0	0	0	0	0	0	0
20/08/2015	16:10:00	20760	17:00:00	2	81	7	cod	0	0	0	0	0	0	0	0	0	0	0	0	0	0	0
20/08/2015	16:11:00	20820	18:00:00	2	81	7	cod	0	0	0	0	0	0	0	0	0	0	0	0	0	0	0
20/08/2015	16:12:00	20880	19:00:00	2	81	7	cod	0	0	0	0	0	0	0	0	0	0	0	0	0	0	0
20/08/2015	16:13:00	20940	20:00:00	2	81	7	cod	0	0	0	0	0	0	0	0	0	0	0	0	0	0	0
20/08/2015	16:14:00	21000	21:00:00	2	81	7	cod	0	0	0	0	0	0	0	0	0	0	0	0	0	0	0
20/08/2015	16:15:00	21060	22:00:00	2	81	7	cod	0	0	0	0	0	0	0	0	0	0	0	0	0	0	0
20/08/2015	16:16:00	21120	23:00:00	2	81	7	cod	0	0	0	0	0	0	0	0	0	0	0	0	0	0	0
20/08/2015	16:17:00	21180	1 day, 0:00:00	2	81	7	cod	0	0	0	0	0	0	0	0	0	0	0	0	0	0	0
20/08/2015	16:18:00	21240	1 day, 1:00:00	2	81	7	cod	0	0	0	0	0	0	0	0	0	0	0	0	0	0	0
20/08/2015	16:19:00	21300	1 day, 2:00:00	2	81	7	cod	0	0	0	0	0	0	0	0	0	0	0	0	0	0	0
20/08/2015	16:20:00	21360	1 day, 3:00:00	2	81	7	cod	0	0	0	0	0	0	0	0	0	0	0	0	0	0	0
20/08/2015	16:21:00	21420	1 day, 4:00:00	2	81	7	cod	0	0	0	0	0	0	0	0	0	0	0	0	0	0	0
20/08/2015	16:22:00	21480	1 day, 5:00:00	2	81	7	cod	0	0	0	0	0	0	0	0	0	0	0	0	0	0	0
20/08/2015	16:23:00	21540	1 day, 6:00:00	2	81	7	cod	0	0	0	0	0	0	0	0	0	0	0	0	0	0	0
20/08/2015	16:24:00	21600	1:00:00	2	82	7	tc	1	0	0	0	0	0	0	1	0	0	0	0	0	0	0
20/08/2015	16:24:00	21600	1:00:00	2	82	7	cod	1	0	0	0	0	0	0	1	0	0	0	0	0	0	0
20/08/2015	16:25:00	21660	2:00:00	2	82	7	cod	0	0	0	0	0	0	0	0	0	1	1	0	1	0	0
20/08/2015	16:26:00	21720	3:00:00	2	82	7	cod	0	0	0	0	0	0	0	0	0	0	0	0	0	0	0
20/08/2015	16:27:00	21780	4:00:00	2	82	7	cod	0	0	0	0	0	0	0	0	0	0	0	0	0	0	0
20/08/2015	16:28:00	21840	5:00:00	2	82	7	cod	0	0	0	0	0	0	0	0	0	0	0	0	0	0	0
20/08/2015	16:29:00	21900	6:00:00	2	82	7	cod	0	0	0	0	0	0	0	0	0	0	0	0	0	0	0
20/08/2015	16:30:00	21960	7:00:00	2	82	7	cod	0	0	0	0	0	0	0	0	0	0	0	0	0	0	0
20/08/2015	16:31:00	22020	8:00:00	2	82	7	cod	0	0	0	0	0	0	0	0	0	0	0	0	0	0	0
20/08/2015	16:32:00	22080	9:00:00	2	82	7	cod	0	0	0	0	0	0	0	0	0	0	0	0	0	0	0
20/08/2015	16:33:00	22140	10:00:00	2	82	7	cod	0	0	0	0	0	0	0	0	0	0	0	0	0	0	0
20/08/2015	16:34:00	22200	11:00:00	2	82	7	cod	0	0	0	0	0	0	0	0	0	0	0	0	0	0	0
20/08/2015	16:35:00	22260	12:00:00	2	82	8	cod	0	0	0	0	0	0	0	0	0	0	0	0	0	0	0
20/08/2015	16:36:00	22320	13:00:00	2	82	8	cod	0	0	0	0	0	0	0	0	0	0	0	0	0	0	0
20/08/2015	16:37:00	22380	14:00:00	2	82	8	cod	0	0	0	0	0	0	0	0	0	0	0	0	0	0	0
20/08/2015	16:38:00	22440	15:00:00	2	82	8	cod	0	0	0	0	0	0	0	0	0	0	0	0	0	0	0
20/08/2015	16:39:00	22500	16:00:00	2	82	8	tc	1	0	0	0	0	0	0	1	0	0	0	0	0	0	0
20/08/2015	16:39:00	22500	16:00:00	2	82	8	cod	0	0	0	0	0	0	0	0	0	0	0	0	0	0	0
20/08/2015	16:40:00	22560	17:00:00	2	82	8	cod	0	0	0	0	0	0	0	0	0	0	0	0	0	0	0
20/08/2015	16:41:00	22620	18:00:00	2	82	8	cod	1	0	1	0	0	0	0	0	0	0	0	0	0	0	0
20/08/2015	16:42:00	22680	19:00:00	2	82	8	cod	0	0	0	0	0	0	0	0	0	0	0	0	0	0	0
20/08/2015	16:43:00	22740	20:00:00	2	82	8	tc	1	0	0	0	0	0	0	0	1	0	0	0	0	0	0
20/08/2015	16:43:00	22740	20:00:00	2	82	8	cod	0	0	0	0	0	0	0	0	0	0	0	0	0	0	0
20/08/2015	16:44:00	22800	21:00:00	2	82	8	cod	0	0	0	0	0	0	0	0	0	0	0	0	0	0	0
20/08/2015	16:45:00	22860	22:00:00	2	82	8	cod	7	6	0	0	0	0	0	0	2	0	0	0	0	0	0
20/08/2015	16:46:00	22920	23:00:00	2	82	8	cod	3	2	0	0	0	0	0	0	1	0	0	0	0	0	0
20/08/2015	16:47:00	22980	1 day, 0:00:00	2	82	8	cod	2	2	0	0	0	0	0	0	0	0	0	0	0	0	0
20/08/2015	16:48:00	23040	1 day, 1:00:00	2	82	8	cod	5	2	0	0	0	0	0	0	3	0	0	0	0	0	0
20/08/2015	16:49:00	23100	1 day, 2:00:00	2	82	8	cod	3	1	0	0	0	0	0	0	2	0	0	0	0	0	0
20/08/2015	16:50:00	23160	1 day, 3:00:00	2	82	8	cod	1	1	0	0	0	0	0	0	0	0	0	0	0	0	0
20/08/2015	16:51:00	23220	1 day, 4:00:00	2	82	8	cod	1	0	0	0	1	0	0	0	0	0	0	0	0	0	0
20/08/2015	16:52:00	23280	1 day, 5:00:00	2	82	8	tc	1	1	0	0	0	0	0	0	0	0	0	0	0	0	0
20/08/2015	16:52:00	23280	1 day, 5:00:00	2	82	8	cod	0	0	0	0	0	0	0	0	0	0	0	0	0	0	0
20/08/2015	16:53:00	23340	1 day, 6:00:00	2	82	8	tc	1	1	0	0	0	0	0	0	0	0	0	0	0	0	0
20/08/2015	16:53:00	23340	1 day, 6:00:00	2	82	8	cod	0	0	0	0	0	0	0	0	0	0	0	0	0	0	0
20/08/2015	16:54:00	23400	1:00:00	2	83	8	cod	0	0	0	0	0	0	0	0	0	1	0	1	0	0	0
20/08/2015	16:55:00	23460	2:00:00	2	83	8	cod	0	0	0	0	0	0	0	0	0	2	0	2	0	2	0
20/08/2015	16:56:00	23520	3:00:00	2	83	8	cod	0	0	0	0	0	0	0	0	0	1	0	1	0	1	0
20/08/2015	16:57:00	23580	4:00:00	2	83	8	cod	0	0	0	0	0	0	0	0	0	0	0	0	0	1	0
20/08/2015	16:58:00	23640	5:00:00	2	83	8	cod	1	1	0	0	0	0	0	0	0	0	0	0	0	0	0
20/08/2015	16:59:00	23700	6:00:00	2	83	8	cod	0	0	0	0	0	0	0	0	0	1	1	0	0	1	0
20/08/2015	17:00:00	23760	7:00:00	2	83	8	cod	1	0	0	0	0	0	0	0	1	0	0	0	0	0	0
20/08/2015	17:01:00	23820	8:00:00	2	83	8	cod	1	0	0	0	0	0	0	0	1	1	1	0	0	1	0
20/08/2015	17:02:00	23880	9:00:00	2	83	8	cod	1	1	0	0	0	0	0	0	0	0	0	0	0	0	0
20/08/2015	17:03:00	23940	10:00:00	2	83	8	cod	1	1	0	0	0	0	0	0	0	0	0	0	0	0	0
20/08/2015	17:04:00	24000	11:00:00	2	83	8	cod	0	0	0	0	0	0	0	0	0	1	1	0	1	0	0
20/08/2015	17:05:00	24060	12:00:00	2	83	8	cod	0	0	0	0	0	0	0	0	0	0	0	0	0	0	0
20/08/2015	17:06:00	24120	13:00:00	2	83	8	cod	0	0	0	0	0	0	0	0	0	0	0	0	0	0	0
20/08/2015	17:07:00	24180	14:00:00	2	83	8	cod	0	0	0	0	0	0	0	0	0	0	0	0	0	0	0
20/08/2015	17:08:00	24240	15:00:00	2	83	8	cod	5	0	3	1	1	0	0	0	0	0	0	0	0	0	0
20/08/2015	17:09:00	24300	16:00:00	2	83	8	cod	0	0	0	0	0	0	0	0	0	0	0	0	0	0	0
20/08/2015	17:10:00	24360	17:00:00	2	83	8	cod	0	0	0	0	0	0	0	0	0	0	0	0	0	0	0
20/08/2015	17:11:00	24420	18:00:00	2	83	8	cod	0	0	0	0	0	0	0	0	0	0	0	0	0	0	0
20/08/2015	17:12:00	24480	19:00:00	2	83	8	cod	0	0	0	0	0	0	0	0	0	0	0	0	0	0	0
20/08/2015	17:13:00	24540	20:00:00	2	83	8	cod	0	0	0	0	0	0	0	0	0	0	0	0	0	0	0
20/08/2015	17:14:00	24600	21:00:00	2	83	8	cod	0	0	0	0	0	0	0	0	0	0	0	0	0	0	0
20/08/2015	17:15:00	24660	22:00:00	2	83	8	cod	0	0	0	0	0	0	0	0	0	0	0	0	0	0	0
20/08/2015	17:16:00	24720	23:00:00	2	83	8	cod	0	0	0	0	0	0	0	0	0	0	0	0	0	0	0
20/08/2015	17:17:00	24780	1 day, 0:00:00	2	83	8	cod	0	0	0	0	0	0	0	0	0	0	0	0	0	0	0
20/08/2015	17:18:00	24840	1 day, 1:00:00	2	83	8	cod	0	0	0	0	0	0	0	0	0	0	0	0	0	0	0
20/08/2015	17:19:00	24900	1 day, 2:00:00	2	83	8	cod	0	0	0	0	0	0	0	0	0	0	0	0	0	0	0
20/08/2015	17:20:00	24960	1 day, 3:00:00	2	83	8	cod	6	0	0	0	6	0	0	0	0	0	0	0	0	0	0
20/08/2015	17:21:00	25020	1 day, 4:00:00	2	83	8	cod	0	0	0	0	0	0	0	0	0	0	0	0	0	0	0
20/08/2015	17:22:00	25080	1 day, 5:00:00	2	83	8	cod	4	3	1	0	0	0	0	0	0	0	0	0	0	0	0
20/08/2015	17:23:00	25140	1 day, 6:00:00	2	83	8	cod	1	0	0	0	0	0	1	0	0	0	0	0	0	0	0
20/08/2015	17:24:00	25200	1:00:00	2	84	8	cod	2	1	0	0	0	0	0	1	0	0	0	0	0	0	0
20/08/2015	17:25:00	25260	2:00:00	2	84	8	tc	1	1	0	0	0	0	0	0	0	0	0	0	0	0	0
20/08/2015	17:25:00	25260	2:00:00	2	84	8	cod	3	2	0	0	0	0	0	1	0	1	1	0	0	0	0
20/08/2015	17:26:00	25320	3:00:00	2	84	8	cod	0	0	0	0	0	0	0	0	0	0	0	0	1	0	0
20/08/2015	17:27:00	25380	4:00:00	2	84	8	cod	0	0	0	0	0	0	0	0	0	0	0	0	0	0	0
20/08/2015	17:28:00	25440	5:00:00	2	84	8	cod	0	0	0	0	0	0	0	0	0	0	0	0	0	0	0
20/08/2015	17:29:00	25500	6:00:00	2	84	8	cod	0	0	0	0	0	0	0	0	0	0	0	0	0	0	0
20/08/2015	17:30:00	25560	7:00:00	2	84	8	cod	0	0	0	0	0	0	0	0	0	0	0	0	0	0	0
20/08/2015	17:31:00	25620	8:00:00	2	84	8	cod	0	0	0	0	0	0	0	0	0	0	0	0	0	0	0
20/08/2015	17:32:00	25680	9:00:00	2	84	8	tc	1	1	0	0	0	0	0	0	0	0	0	0	0	0	0
20/08/2015	17:32:00	25680	9:00:00	2	84	8	cod	0	0	0	0	0	0	0	0	0	0	0	0	0	0	0
20/08/2015	17:33:00	25740	10:00:00	2	84	8	cod	0	0	0	0	0	0	0	0	0	0	0	0	0	0	0
20/08/2015	17:34:00	25800	11:00:00	2	84	8	cod	0	0	0	0	0	0	0	0	0	0	0	0	0	0	0
20/08/2015	17:35:00	25860	12:00:00	2	84	8	cod	0	0	0	0	0	0	0	0	0	0	0	0	0	0	0
20/08/2015	17:36:00	25920	13:00:00	2	84	8	cod	0	0	0	0	0	0	0	0	0	0	0	0	0	0	0
20/08/2015	17:37:00	25980	14:00:00	2	84	8	cod	0	0	0	0	0	0	0	0	0	0	0	0	0	0	0
20/08/2015	17:38:00	26040	15:00:00	2	84	8	cod	0	0	0	0	0	0	0	0	0	0	0	0	0	0	0
20/08/2015	17:39:00	26100	16:00:00	2	84	7	cod	0	0	0	0	0	0	0	0	0	0	0	0	0	0	0
20/08/2015	17:40:00	26160	17:00:00	2	84	7	cod	0	0	0	0	0	0	0	0	0	0	0	0	0	0	0
20/08/2015	17:41:00	26220	18:00:00	2	84	7	cod	0	0	0	0	0	0	0	0	0	0	0	0	0	0	0
20/08/2015	17:42:00	26280	19:00:00	2	84	7	cod	0	0	0	0	0	0	0	0	0	0	0	0	0	0	0
20/08/2015	17:43:00	26340	20:00:00	2	84	7	cod	0	0	0	0	0	0	0	0	0	0	0	0	0	0	0
20/08/2015	17:44:00	26400	21:00:00	2	84	5	cod	0	0	0	0	0	0	0	0	0	0	0	0	0	0	0
20/08/2015	17:45:00	26460	22:00:00	2	84	5	cod	0	0	0	0	0	0	0	0	0	0	0	0	0	0	0
20/08/2015	17:46:00	26520	23:00:00	2	84	5	cod	0	0	0	0	0	0	0	0	0	0	0	0	0	0	0
20/08/2015	17:47:00	26580	1 day, 0:00:00	2	84	5	cod	0	0	0	0	0	0	0	0	0	0	0	0	0	0	0
20/08/2015	17:48:00	26640	1 day, 1:00:00	2	84	5	cod	0	0	0	0	0	0	0	0	0	0	0	0	0	0	0
20/08/2015	17:49:00	26700	1 day, 2:00:00	2	84	5	cod	0	0	0	0	0	0	0	0	0	0	0	0	0	0	0
20/08/2015	17:50:00	26760	1 day, 3:00:00	2	84	5	cod	0	0	0	0	0	0	0	0	0	0	0	0	0	0	0
20/08/2015	17:51:00	26820	1 day, 4:00:00	2	84	5	cod	0	0	0	0	0	0	0	0	0	0	0	0	0	0	0
20/08/2015	17:52:00	26880	1 day, 5:00:00	2	84	5	cod	0	0	0	0	0	0	0	0	0	0	0	0	0	0	0
20/08/2015	17:53:00	26940	1 day, 6:00:00	2	84	5	cod	0	0	0	0	0	0	0	0	0	0	0	0	0	0	0	Lots of H2O Movement, hard to track H2O direction occasionally
20/08/2015	17:54:00	27000	1:00:00	2	85	5	cod	0	0	0	0	0	0	0	0	0	0	0	0	0	0	0
20/08/2015	17:55:00	27060	2:00:00	2	85	5	cod	0	0	0	0	0	0	0	0	0	0	0	0	0	0	0
20/08/2015	17:56:00	27120	3:00:00	2	85	5	cod	0	0	0	0	0	0	0	0	0	0	0	0	0	0	0
20/08/2015	17:57:00	27180	4:00:00	2	85	7	cod	0	0	0	0	0	0	0	0	0	0	0	0	0	0	0
20/08/2015	17:58:00	27240	5:00:00	2	85	7	cod	0	0	0	0	0	0	0	0	0	0	0	0	0	0	0
20/08/2015	17:59:00	27300	6:00:00	2	85	7	cod	0	0	0	0	0	0	0	0	0	0	0	0	0	0	0
20/08/2015	18:00:00	27360	7:00:00	2	85	7	cod	0	0	0	0	0	0	0	0	0	0	0	0	0	0	0
20/08/2015	18:01:00	27420	8:00:00	2	85	8	cod	0	0	0	0	0	0	0	0	0	0	0	0	0	0	0
20/08/2015	18:02:00	27480	9:00:00	2	85	8	tc	1	0	0	0	1	0	0	0	0	0	0	0	0	0	0
20/08/2015	18:02:00	27480	9:00:00	2	85	8	cod	0	0	0	0	0	0	0	0	0	0	0	0	0	0	0
20/08/2015	18:03:00	27540	10:00:00	2	85	8	tc	1	0	0	0	1	0	0	0	0	0	0	0	0	0	0
20/08/2015	18:03:00	27540	10:00:00	2	85	8	cod	1	0	0	0	1	0	0	0	0	0	0	0	0	0	0
20/08/2015	18:04:00	27600	11:00:00	2	85	8	tc	0	0	0	0	0	0	0	0	0	1	0	1	0	0	0
20/08/2015	18:04:00	27600	11:00:00	2	85	8	cod	1	0	0	0	0	0	1	0	0	0	0	0	0	0	0
20/08/2015	18:05:00	27660	12:00:00	2	85	8	cod	0	0	0	0	0	0	0	0	0	0	0	0	0	0	0
20/08/2015	18:06:00	27720	13:00:00	2	85	8	tc	1	0	1	0	0	0	0	0	0	0	0	0	0	0	0
20/08/2015	18:06:00	27720	13:00:00	2	85	8	cod	0	0	0	0	0	0	0	0	0	0	0	0	0	0	0
20/08/2015	18:07:00	27780	14:00:00	2	85	8	tc	0	0	0	0	0	0	0	0	0	0	0	0	0	1	0
20/08/2015	18:07:00	27780	14:00:00	2	85	8	cod	0	0	0	0	0	0	0	0	0	0	0	0	0	0	0
20/08/2015	18:08:00	27840	15:00:00	2	85	8	cod	0	0	0	0	0	0	0	0	0	0	0	0	0	0	0
20/08/2015	18:09:00	27900	16:00:00	2	85	8	cod	0	0	0	0	0	0	0	0	0	0	0	0	0	0	0
20/08/2015	18:10:00	27960	17:00:00	2	85	8	cod	0	0	0	0	0	0	0	0	0	0	0	0	0	0	0
20/08/2015	18:11:00	28020	18:00:00	2	85	8	cod	0	0	0	0	0	0	0	0	0	0	0	0	0	0	0
20/08/2015	18:12:00	28080	19:00:00	2	85	8	cod	0	0	0	0	0	0	0	0	0	0	0	0	0	0	0
20/08/2015	18:13:00	28140	20:00:00	2	85	8	cod	1	1	0	0	0	0	0	0	0	0	0	0	0	0	0
20/08/2015	18:14:00	28200	21:00:00	2	85	8	cod	0	0	0	0	0	0	0	0	0	0	0	0	0	0	0
20/08/2015	18:15:00	28260	22:00:00	2	85	8	cod	0	0	0	0	0	0	0	0	0	0	0	0	0	0	0
20/08/2015	18:16:00	28320	23:00:00	2	85	8	cod	0	0	0	0	0	0	0	0	0	0	0	0	0	0	0
20/08/2015	18:17:00	28380	1 day, 0:00:00	2	85	8	cod	0	0	0	0	0	0	0	0	0	0	0	0	0	0	0
20/08/2015	18:18:00	28440	1 day, 1:00:00	2	85	8	cod	1	0	0	0	0	1	0	0	0	0	0	0	0	0	0
20/08/2015	18:19:00	28500	1 day, 2:00:00	2	85	8	cod	1	0	1	0	0	0	0	0	0	0	0	0	0	0	0
20/08/2015	18:20:00	28560	1 day, 3:00:00	2	85	8	cod	0	0	0	0	0	0	0	0	0	0	0	0	0	0	0
20/08/2015	18:21:00	28620	1 day, 4:00:00	2	85	8	cod	0	0	0	0	0	0	0	0	0	0	0	0	0	0	0
20/08/2015	18:22:00	28680	1 day, 5:00:00	2	85	8	cod	0	0	0	0	0	0	0	0	0	0	0	0	0	0	0
20/08/2015	18:23:00	28740	1 day, 6:00:00	2	85	8	cod	0	0	0	0	0	0	0	0	0	0	0	0	0	0	0
21/08/2015	9:39:00	83700	1:00:00	2	120	1	cod	0	0	0	0	0	0	0	0	0	0	0	0	0	0	0
21/08/2015	9:40:00	83760	2:00:00	2	120	1	cod	0	0	0	0	0	0	0	0	0	0	0	0	0	0	0
21/08/2015	9:41:00	83820	3:00:00	2	120	1	tc	1	0	0	0	0	1	0	0	0	0	0	0	0	0	0
21/08/2015	9:41:00	83820	3:00:00	2	120	1	cod	0	0	0	0	0	0	0	0	0	0	0	0	0	0	0
21/08/2015	9:42:00	83880	4:00:00	2	120	1	cod	0	0	0	0	0	0	0	0	0	0	0	0	0	0	0
21/08/2015	9:43:00	83940	5:00:00	2	120	1	tc	1	0	0	0	0	0	1	0	0	0	0	0	0	0	0
21/08/2015	9:43:00	83940	5:00:00	2	120	1	cod	0	0	0	0	0	0	0	0	0	0	0	0	0	0	0
21/08/2015	9:44:00	84000	6:00:00	2	120	1	cod	0	0	0	0	0	0	0	0	0	0	0	0	0	0	0
21/08/2015	9:45:00	84060	7:00:00	2	120	1	cod	0	0	0	0	0	0	0	0	0	0	0	0	0	0	0
21/08/2015	9:46:00	84120	8:00:00	2	120	1	cod	0	0	0	0	0	0	0	0	0	0	0	0	0	0	0
21/08/2015	9:47:00	84180	9:00:00	2	120	1	cod	0	0	0	0	0	0	0	0	0	0	0	0	0	0	0
21/08/2015	9:48:00	84240	10:00:00	2	120	3	cod	0	0	0	0	0	0	0	0	0	0	0	0	0	0	0
21/08/2015	9:49:00	84300	11:00:00	2	120	3	cod	0	0	0	0	0	0	0	0	0	0	0	0	0	0	0
21/08/2015	9:50:00	84360	12:00:00	2	120	3	cod	0	0	0	0	0	0	0	0	0	0	0	0	0	0	0
21/08/2015	9:51:00	84420	13:00:00	2	120	3	cod	0	0	0	0	0	0	0	0	0	0	0	0	0	0	0
21/08/2015	9:52:00	84480	14:00:00	2	120	3	cod	0	0	0	0	0	0	0	0	0	0	0	0	0	0	0
21/08/2015	9:53:00	84540	15:00:00	2	120	3	cod	0	0	0	0	0	0	0	0	0	0	0	0	0	0	0
21/08/2015	9:54:00	84600	16:00:00	2	120	3	cod	0	0	0	0	0	0	0	0	0	0	0	0	0	0	0
21/08/2015	9:55:00	84660	17:00:00	2	120	3	cod	2	0	1	0	1	0	0	0	0	0	0	0	0	0	0
21/08/2015	9:56:00	84720	18:00:00	2	120	3	cod	2	0	0	0	2	0	0	0	0	0	0	0	0	0	0
21/08/2015	9:57:00	84780	19:00:00	2	120	3	cod	0	0	0	0	0	0	0	0	0	0	0	0	0	0	0
21/08/2015	9:58:00	84840	20:00:00	2	120	3	cod	0	0	0	0	0	0	0	0	0	0	0	0	0	0	0
21/08/2015	9:59:00	84900	21:00:00	2	120	3	sculpin	1	0	0	0	0	1	0	0	0	0	0	0	0	0	0
21/08/2015	9:59:00	84900	21:00:00	2	120	3	cod	1	0	0	1	0	0	0	0	0	0	0	0	0	0	0
21/08/2015	10:00:00	84960	22:00:00	2	120	3	cod	0	0	0	0	0	0	0	0	0	0	0	0	0	0	0
21/08/2015	10:01:00	85020	23:00:00	2	120	4	cod	0	0	0	0	0	0	0	0	0	0	0	0	0	0	0
21/08/2015	10:02:00	85080	1 day, 0:00:00	2	120	4	cod	0	0	0	0	0	0	0	0	0	0	0	0	0	0	0
21/08/2015	10:03:00	85140	1 day, 1:00:00	2	120	4	cod	0	0	0	0	0	0	0	0	0	0	0	0	0	0	0
21/08/2015	10:04:00	85200	1 day, 2:00:00	2	120	4	cod	0	0	0	0	0	0	0	0	0	0	0	0	0	0	0
21/08/2015	10:05:00	85260	1 day, 3:00:00	2	120	4	cod	0	0	0	0	0	0	0	0	0	0	0	0	0	0	0
21/08/2015	10:06:00	85320	1 day, 4:00:00	2	120	4	cod	0	0	0	0	0	0	0	0	0	0	0	0	0	0	0
21/08/2015	10:07:00	85380	1 day, 5:00:00	2	120	4	cod	0	0	0	0	0	0	0	0	0	0	0	0	0	0	0
21/08/2015	10:08:00	85440	1 day, 6:00:00	2	120	4	cod	0	0	0	0	0	0	0	0	0	0	0	0	0	0	0
21/08/2015	10:09:00	85500	1:00:00	2	121	4	cod	0	0	0	0	0	0	0	0	0	0	0	0	0	0	0
21/08/2015	10:10:00	85560	2:00:00	2	121	4	cod	0	0	0	0	0	0	0	0	0	0	0	0	0	0	0
21/08/2015	10:11:00	85620	3:00:00	2	121	4	cod	0	0	0	0	0	0	0	0	0	0	0	0	0	0	0
21/08/2015	10:12:00	85680	4:00:00	2	121	4	cod	0	0	0	0	0	0	0	0	0	0	0	0	0	0	0
21/08/2015	10:13:00	85740	5:00:00	2	121	4	cod	0	0	0	0	0	0	0	0	0	0	0	0	0	0	0
21/08/2015	10:14:00	85800	6:00:00	2	121	4	cod	0	0	0	0	0	0	0	0	0	0	0	0	0	0	0
21/08/2015	10:15:00	85860	7:00:00	2	121	4	cod	1	0	0	0	1	0	0	0	0	0	0	0	0	0	0
21/08/2015	10:16:00	85920	8:00:00	2	121	4	cod	1	0	0	0	0	0	0	0	1	0	0	0	0	0	0
21/08/2015	10:17:00	85980	9:00:00	2	121	4	cod	0	0	0	0	0	0	0	0	0	0	0	0	0	0	0
21/08/2015	10:18:00	86040	10:00:00	2	121	4	cod	0	0	0	0	0	0	0	0	0	0	0	0	0	0	0
21/08/2015	10:19:00	86100	11:00:00	2	121	3	cod	0	0	0	0	0	0	0	0	0	0	0	0	0	0	0
21/08/2015	10:20:00	86160	12:00:00	2	121	3	cod	0	0	0	0	0	0	0	0	0	0	0	0	0	0	0
21/08/2015	10:21:00	86220	13:00:00	2	121	3	cod	0	0	0	0	0	0	0	0	0	0	0	0	0	0	0
21/08/2015	10:22:00	86280	14:00:00	2	121	3	cod	0	0	0	0	0	0	0	0	0	0	0	0	0	0	0
21/08/2015	10:23:00	86340	15:00:00	2	121	3	cod	0	0	0	0	0	0	0	0	0	0	0	0	0	0	0
21/08/2015	10:24:00	86400	16:00:00	2	121	3	cod	0	0	0	0	0	0	0	0	0	0	0	0	0	0	0
21/08/2015	10:25:00	86460	17:00:00	2	121	3	cod	0	0	0	0	0	0	0	0	0	0	0	0	0	0	0
21/08/2015	10:26:00	86520	18:00:00	2	121	3	cod	0	0	0	0	0	0	0	0	0	0	0	0	0	0	0
21/08/2015	10:27:00	86580	19:00:00	2	121	3	cod	0	0	0	0	0	0	0	0	0	0	0	0	0	0	0
21/08/2015	10:28:00	86640	20:00:00	2	121	3	cod	0	0	0	0	0	0	0	0	0	0	0	0	0	0	0
21/08/2015	10:29:00	86700	21:00:00	2	121	3	cod	0	0	0	0	0	0	0	0	0	0	0	0	0	0	0
21/08/2015	10:30:00	86760	22:00:00	2	121	3	cod	0	0	0	0	0	0	0	0	0	0	0	0	0	0	0
21/08/2015	10:31:00	86820	23:00:00	2	121	4	cod	0	0	0	0	0	0	0	0	0	0	0	0	0	0	0
21/08/2015	10:32:00	86880	1 day, 0:00:00	2	121	4	cod	0	0	0	0	0	0	0	0	0	0	0	0	0	0	0
21/08/2015	10:33:00	86940	1 day, 1:00:00	2	121	4	cod	1	0	1	0	0	0	0	0	0	0	0	0	0	0	0
21/08/2015	10:34:00	87000	1 day, 2:00:00	2	121	4	cod	1	0	0	0	0	1	0	0	0	0	0	0	0	0	0
21/08/2015	10:35:00	87060	1 day, 3:00:00	2	121	4	cod	0	0	0	0	0	0	0	0	0	1	0	1	1	0	1	"Drive Through"
21/08/2015	10:36:00	87120	1 day, 4:00:00	2	121	4	cod	1	0	0	0	0	1	0	0	0	0	0	0	0	0	0
21/08/2015	10:37:00	87180	1 day, 5:00:00	2	121	4	cod	0	0	0	0	0	0	0	0	0	0	0	0	0	0	0
21/08/2015	10:38:00	87240	1 day, 6:00:00	2	121	4	cod	1	0	0	0	0	1	0	0	0	1	0	1	0	0	0
21/08/2015	10:39:00	87300	1:00:00	2	122	4	cod	0	0	0	0	0	0	0	0	0	0	0	0	0	1	0
21/08/2015	10:40:00	87360	2:00:00	2	122	4	cod	0	0	0	0	0	0	0	0	0	0	0	0	0	0	0
21/08/2015	10:41:00	87420	3:00:00	2	122	4	cod	1	0	0	0	1	0	0	0	0	0	0	0	0	0	0
21/08/2015	10:42:00	87480	4:00:00	2	122	4	cod	0	0	0	0	0	0	0	0	0	0	0	0	0	0	0
21/08/2015	10:43:00	87540	5:00:00	2	122	4	cod	0	0	0	0	0	0	0	0	0	0	0	0	0	0	0
21/08/2015	10:44:00	87600	6:00:00	2	122	4	cod	2	0	0	0	2	0	0	0	0	0	0	0	0	0	0
21/08/2015	10:45:00	87660	7:00:00	2	122	4	cod	0	0	0	0	0	0	0	0	0	0	0	0	0	0	0
21/08/2015	10:46:00	87720	8:00:00	2	122	4	cod	0	0	0	0	0	0	0	0	0	0	0	0	0	0	0
21/08/2015	10:47:00	87780	9:00:00	2	122	4	cod	0	0	0	0	0	0	0	0	0	0	0	0	0	0	0	9 Min Video
21/08/2015	10:48:00	87840	1:00:00	2	123	4	cod	0	0	0	0	0	0	0	0	0	0	0	0	0	0	0
21/08/2015	10:49:00	87900	2:00:00	2	123	4	cod	3	0	2	1	0	0	0	0	0	0	0	0	0	0	0
21/08/2015	10:50:00	87960	3:00:00	2	123	4	cod	7	0	4	0	1	1	1	0	0	0	0	0	0	0	0
21/08/2015	10:51:00	88020	4:00:00	2	123	4	cod	0	0	0	0	0	0	0	0	0	0	0	0	0	0	0
21/08/2015	10:52:00	88080	5:00:00	2	123	4	cod	0	0	0	0	0	0	0	0	0	0	0	0	0	0	0
21/08/2015	10:53:00	88140	6:00:00	2	123	4	cod	0	0	0	0	0	0	0	0	0	0	0	0	0	0	0
21/08/2015	10:54:00	88200	7:00:00	2	123	4	cod	0	0	0	0	0	0	0	0	0	0	0	0	0	0	0
21/08/2015	10:55:00	88260	8:00:00	2	123	4	cod	0	0	0	0	0	0	0	0	0	0	0	0	0	0	0
21/08/2015	10:56:00	88320	9:00:00	2	123	4	cod	0	0	0	0	0	0	0	0	0	0	0	0	0	0	0
21/08/2015	10:57:00	88380	10:00:00	2	123	4	cod	0	0	0	0	0	0	0	0	0	0	0	0	0	0	0
21/08/2015	10:58:00	88440	11:00:00	2	123	4	cod	0	0	0	0	0	0	0	0	0	0	0	0	0	0	0
21/08/2015	10:59:00	88500	12:00:00	2	123	4	cod	0	0	0	0	0	0	0	0	0	0	0	0	0	0	0
21/08/2015	11:00:00	88560	13:00:00	2	123	4	cod	0	0	0	0	0	0	0	0	0	0	0	0	0	0	0
21/08/2015	11:01:00	88620	14:00:00	2	123	4	cod	0	0	0	0	0	0	0	0	0	0	0	0	0	0	0
21/08/2015	11:02:00	88680	15:00:00	2	123	4	cod	0	0	0	0	0	0	0	0	0	0	0	0	0	0	0
21/08/2015	11:03:00	88740	16:00:00	2	123	4	cod	0	0	0	0	0	0	0	0	0	0	0	0	0	0	0
21/08/2015	11:04:00	88800	17:00:00	2	123	3	cod	0	0	0	0	0	0	0	0	0	0	0	0	0	0	0
21/08/2015	11:05:00	88860	18:00:00	2	123	3	cod	0	0	0	0	0	0	0	0	0	0	0	0	0	0	0
21/08/2015	11:06:00	88920	19:00:00	2	123	3	cod	0	0	0	0	0	0	0	0	0	0	0	0	0	0	0
21/08/2015	11:07:00	88980	20:00:00	2	123	3	cod	0	0	0	0	0	0	0	0	0	0	0	0	0	0	0
21/08/2015	11:08:00	89040	21:00:00	2	123	3	cod	0	0	0	0	0	0	0	0	0	0	0	0	0	0	0
21/08/2015	11:09:00	89100	22:00:00	2	123	3	cod	0	0	0	0	0	0	0	0	0	0	0	0	0	0	0
21/08/2015	11:10:00	89160	23:00:00	2	123	3	cod	0	0	0	0	0	0	0	0	0	0	0	0	0	0	0
21/08/2015	11:11:00	89220	1 day, 0:00:00	2	123	3	cod	0	0	0	0	0	0	0	0	0	0	0	0	0	0	0
21/08/2015	11:12:00	89280	1 day, 1:00:00	2	123	3	cod	0	0	0	0	0	0	0	0	0	0	0	0	0	0	0
21/08/2015	11:13:00	89340	1 day, 2:00:00	2	123	3	cod	0	0	0	0	0	0	0	0	0	0	0	0	0	0	0
21/08/2015	11:14:00	89400	1 day, 3:00:00	2	123	3	cod	3	1	2	0	0	0	0	0	0	0	0	0	0	0	0
21/08/2015	11:15:00	89460	1 day, 4:00:00	2	123	3	cod	8	0	3	3	2	0	0	0	0	0	0	0	0	0	0
21/08/2015	11:16:00	89520	1 day, 5:00:00	2	123	3	cod	1	0	0	0	1	0	0	0	0	0	0	0	0	0	0
21/08/2015	11:17:00	89580	1 day, 6:00:00	2	123	3	cod	1	0	0	0	1	0	0	0	0	0	0	0	0	0	0
21/08/2015	11:18:00	89640	1:00:00	2	124	3	cod	0	0	0	0	0	0	0	0	0	0	0	0	0	0	0
21/08/2015	11:19:00	89700	2:00:00	2	124	3	cod	0	0	0	0	0	0	0	0	0	0	0	0	0	0	0
21/08/2015	11:20:00	89760	3:00:00	2	124	3	cod	0	0	0	0	0	0	0	0	0	0	0	0	0	0	0
21/08/2015	11:21:00	89820	4:00:00	2	124	3	cod	0	0	0	0	0	0	0	0	0	0	0	0	0	0	0
21/08/2015	11:22:00	89880	5:00:00	2	124	3	cod	0	0	0	0	0	0	0	0	0	0	0	0	0	0	0
21/08/2015	11:23:00	89940	6:00:00	2	124	3	cod	0	0	0	0	0	0	0	0	0	0	0	0	0	0	0
21/08/2015	11:24:00	90000	7:00:00	2	124	4	cod	0	0	0	0	0	0	0	0	0	0	0	0	0	0	0
21/08/2015	11:25:00	90060	8:00:00	2	124	4	cod	0	0	0	0	0	0	0	0	0	0	0	0	0	0	0
21/08/2015	11:26:00	90120	9:00:00	2	124	4	cod	0	0	0	0	0	0	0	0	0	0	0	0	0	0	0
21/08/2015	11:27:00	90180	10:00:00	2	124	3	cod	0	0	0	0	0	0	0	0	0	0	0	0	0	0	0
21/08/2015	11:28:00	90240	11:00:00	2	124	3	cod	0	0	0	0	0	0	0	0	0	0	0	0	0	0	0
21/08/2015	11:29:00	90300	12:00:00	2	124	3	cod	0	0	0	0	0	0	0	0	0	0	0	0	0	0	0
21/08/2015	11:30:00	90360	13:00:00	2	124	3	cod	0	0	0	0	0	0	0	0	0	0	0	0	0	0	0
21/08/2015	11:31:00	90420	14:00:00	2	124	3	cod	0	0	0	0	0	0	0	0	0	0	0	0	0	0	0
21/08/2015	11:32:00	90480	15:00:00	2	124	3	cod	0	0	0	0	0	0	0	0	0	0	0	0	0	0	0
21/08/2015	11:33:00	90540	16:00:00	2	124	3	cod	0	0	0	0	0	0	0	0	0	0	0	0	0	0	0
21/08/2015	11:34:00	90600	17:00:00	2	124	3	cod	0	0	0	0	0	0	0	0	0	0	0	0	0	0	0
21/08/2015	11:35:00	90660	18:00:00	2	124	3	cod	0	0	0	0	0	0	0	0	0	0	0	0	0	0	0
21/08/2015	11:36:00	90720	19:00:00	2	124	3	cod	0	0	0	0	0	0	0	0	0	0	0	0	0	0	0
21/08/2015	11:37:00	90780	20:00:00	2	124	3	cod	0	0	0	0	0	0	0	0	0	0	0	0	0	0	0
21/08/2015	11:38:00	90840	21:00:00	2	124	3	cod	0	0	0	0	0	0	0	0	0	0	0	0	0	0	0
21/08/2015	11:39:00	90900	22:00:00	2	124	3	cod	0	0	0	0	0	0	0	0	0	0	0	0	0	0	0
21/08/2015	11:40:00	90960	23:00:00	2	124	3	cod	0	0	0	0	0	0	0	0	0	0	0	0	0	0	0
21/08/2015	11:41:00	91020	1 day, 0:00:00	2	124	3	cod	0	0	0	0	0	0	0	0	0	0	0	0	0	0	0
21/08/2015	11:42:00	91080	1 day, 1:00:00	2	124	3	cod	13	0	1	2	6	1	0	2	1	1	1	0	1	0	1	Drive Through
21/08/2015	11:43:00	91140	1 day, 2:00:00	2	124	4	cod	6	0	1	0	4	1	0	0	0	1	0	1	0	1	0
21/08/2015	11:44:00	91200	1 day, 3:00:00	2	124	4	cod	0	0	0	0	0	0	0	0	0	1	0	1	0	1	0
21/08/2015	11:45:00	91260	1 day, 4:00:00	2	124	4	cod	1	0	0	0	0	1	0	0	0	1	0	1	0	1	0
21/08/2015	11:46:00	91320	1 day, 5:00:00	2	124	4	cod	2	0	1	0	0	1	0	0	0	0	0	0	0	0	0
21/08/2015	11:47:00	91380	1 day, 6:00:00	2	124	4	cod	1	0	0	0	0	1	0	0	0	0	0	0	0	0	0
21/08/2015	11:48:00	91440	1:00:00	2	125	4	cod	0	0	0	0	0	0	0	0	0	0	0	0	0	0	0
21/08/2015	11:49:00	91500	2:00:00	2	125	4	cod	0	0	0	0	0	0	0	0	0	0	0	0	0	0	0
21/08/2015	11:50:00	91560	3:00:00	2	125	4	cod	0	0	0	0	0	0	0	0	0	0	0	0	0	0	0
21/08/2015	11:51:00	91620	4:00:00	2	125	4	cod	0	0	0	0	0	0	0	0	0	0	0	0	0	0	0
21/08/2015	11:52:00	91680	5:00:00	2	125	4	cod	0	0	0	0	0	0	0	0	0	0	0	0	0	0	0
21/08/2015	11:53:00	91740	6:00:00	2	125	4	cod	0	0	0	0	0	0	0	0	0	0	0	0	0	0	0
21/08/2015	11:54:00	91800	7:00:00	2	125	4	cod	0	0	0	0	0	0	0	0	0	0	0	0	0	0	1
21/08/2015	11:55:00	91860	8:00:00	2	125	4	cod	0	0	0	0	0	0	0	0	0	0	0	0	0	0	0
21/08/2015	11:56:00	91920	9:00:00	2	125	4	cod	0	0	0	0	0	0	0	0	0	0	0	0	0	0	0
21/08/2015	11:57:00	91980	10:00:00	2	125	4	cod	0	0	0	0	0	0	0	0	0	0	0	0	0	0	0
21/08/2015	11:58:00	92040	11:00:00	2	125	4	cod	0	0	0	0	0	0	0	0	0	0	0	0	0	0	0
21/08/2015	11:59:00	92100	12:00:00	2	125	4	cod	0	0	0	0	0	0	0	0	0	0	0	0	0	0	0
21/08/2015	12:00:00	92160	13:00:00	2	125	4	cod	0	0	0	0	0	0	0	0	0	0	0	0	0	0	0
21/08/2015	12:01:00	92220	14:00:00	2	125	4	cod	0	0	0	0	0	0	0	0	0	0	0	0	0	0	0
21/08/2015	12:02:00	92280	15:00:00	2	125	4	cod	0	0	0	0	0	0	0	0	0	0	0	0	0	0	0
21/08/2015	12:03:00	92340	16:00:00	2	125	3	cod	0	0	0	0	0	0	0	0	0	0	0	0	0	0	0
21/08/2015	12:04:00	92400	17:00:00	2	125	3	cod	0	0	0	0	0	0	0	0	0	0	0	0	0	0	0
21/08/2015	12:05:00	92460	18:00:00	2	125	3	cod	0	0	0	0	0	0	0	0	0	0	0	0	0	0	0
21/08/2015	12:06:00	92520	19:00:00	2	125	3	cod	0	0	0	0	0	0	0	0	0	0	0	0	0	0	0
21/08/2015	12:07:00	92580	20:00:00	2	125	3	cod	0	0	0	0	0	0	0	0	0	0	0	0	0	0	0
21/08/2015	12:08:00	92640	21:00:00	2	125	3	cod	0	0	0	0	0	0	0	0	0	0	0	0	0	0	0
21/08/2015	12:09:00	92700	22:00:00	2	125	3	cod	0	0	0	0	0	0	0	0	0	0	0	0	0	0	0
21/08/2015	12:10:00	92760	23:00:00	2	125	3	cod	0	0	0	0	0	0	0	0	0	0	0	0	0	0	0
21/08/2015	12:11:00	92820	1 day, 0:00:00	2	125	3	cod	0	0	0	0	0	0	0	0	0	0	0	0	0	0	0
21/08/2015	12:12:00	92880	1 day, 1:00:00	2	125	3	cod	0	0	0	0	0	0	0	0	0	0	0	0	0	0	0
21/08/2015	12:13:00	92940	1 day, 2:00:00	2	125	3	cod	0	0	0	0	0	0	0	0	0	0	0	0	0	0	0
21/08/2015	12:14:00	93000	1 day, 3:00:00	2	125	3	cod	0	0	0	0	0	0	0	0	0	0	0	0	0	0	0
21/08/2015	12:15:00	93060	1 day, 4:00:00	2	125	3	cod	0	0	0	0	0	0	0	0	0	0	0	0	0	0	0
21/08/2015	12:16:00	93120	1 day, 5:00:00	2	125	3	cod	0	0	0	0	0	0	0	0	0	0	0	0	0	0	0
21/08/2015	12:17:00	93180	1 day, 6:00:00	2	125	3	cod	0	0	0	0	0	0	0	0	0	0	0	0	0	0	0
21/08/2015	12:18:00	93240	1:00:00	2	126	3	cod	0	0	0	0	0	0	0	0	0	0	0	0	0	0	0
21/08/2015	12:19:00	93300	2:00:00	2	126	3	cod	0	0	0	0	0	0	0	0	0	0	0	0	0	0	0
21/08/2015	12:20:00	93360	3:00:00	2	126	3	cod	0	0	0	0	0	0	0	0	0	0	0	0	0	0	0
21/08/2015	12:21:00	93420	4:00:00	2	126	3	cod	0	0	0	0	0	0	0	0	0	0	0	0	0	0	0
21/08/2015	12:22:00	93480	5:00:00	2	126	3	cod	0	0	0	0	0	0	0	0	0	0	0	0	0	0	0
21/08/2015	12:23:00	93540	6:00:00	2	126	3	cod	0	0	0	0	0	0	0	0	0	0	0	0	0	0	0
21/08/2015	12:24:00	93600	7:00:00	2	126	3	cod	0	0	0	0	0	0	0	0	0	0	0	0	0	0	0
21/08/2015	12:25:00	93660	8:00:00	2	126	3	cod	0	0	0	0	0	0	0	0	0	0	0	0	0	0	0
21/08/2015	12:26:00	93720	9:00:00	2	126	3	cod	0	0	0	0	0	0	0	0	0	0	0	0	0	0	0
21/08/2015	12:27:00	93780	10:00:00	2	126	3	cod	0	0	0	0	0	0	0	0	0	0	0	0	0	0	0
21/08/2015	12:28:00	93840	11:00:00	2	126	3	cod	0	0	0	0	0	0	0	0	0	0	0	0	0	0	0
21/08/2015	12:29:00	93900	12:00:00	2	126	3	cod	0	0	0	0	0	0	0	0	0	0	0	0	0	0	0
21/08/2015	12:30:00	93960	13:00:00	2	126	3	cod	0	0	0	0	0	0	0	0	0	0	0	0	0	0	0
21/08/2015	12:31:00	94020	14:00:00	2	126	3	cod	0	0	0	0	0	0	0	0	0	0	0	0	0	0	0
21/08/2015	12:32:00	94080	15:00:00	2	126	3	cod	0	0	0	0	0	0	0	0	0	0	0	0	0	0	0
21/08/2015	12:33:00	94140	16:00:00	2	126	3	cod	0	0	0	0	0	0	0	0	0	0	0	0	0	0	0
21/08/2015	12:34:00	94200	17:00:00	2	126	3	cod	0	0	0	0	0	0	0	0	0	0	0	0	0	0	0
21/08/2015	12:35:00	94260	18:00:00	2	126	3	cod	0	0	0	0	0	0	0	0	0	0	0	0	0	0	0
21/08/2015	12:36:00	94320	19:00:00	2	126	3	cod	0	0	0	0	0	0	0	0	0	0	0	0	0	0	0
21/08/2015	12:37:00	94380	20:00:00	2	126	3	cod	0	0	0	0	0	0	0	0	0	0	0	0	0	0	0
21/08/2015	12:38:00	94440	21:00:00	2	126	3	cod	0	0	0	0	0	0	0	0	0	0	0	0	0	0	0
21/08/2015	12:39:00	94500	22:00:00	2	126	3	cod	0	0	0	0	0	0	0	0	0	0	0	0	0	0	0
21/08/2015	12:40:00	94560	23:00:00	2	126	3	cod	0	0	0	0	0	0	0	0	0	0	0	0	0	0	0	Hauled at: Video Time - / Actual Time - 12:15PM / Calculated Time - 12:40PM
21/08/2015	15:47:00	0	0:00:00	3	132																		START
21/08/2015	15:48:00	60	1:00:00	3	132	3	cod	0	0	0	0	0	0	0	0	0	0	0	0	0	0	0
21/08/2015	15:49:00	120	2:00:00	3	132	3	cod	0	0	0	0	0	0	0	0	0	0	0	0	0	0	0
21/08/2015	15:50:00	180	3:00:00	3	132	3	cod	0	0	0	0	0	0	0	0	0	0	0	0	0	0	0
21/08/2015	15:51:00	240	4:00:00	3	132	3	cod	0	0	0	0	0	0	0	0	0	0	0	0	0	0	0
21/08/2015	15:52:00	300	5:00:00	3	132	3	tc	1	1	0	0	0	0	0	0	0	0	0	0	0	0	0
21/08/2015	15:52:00	300	5:00:00	3	132	3	cod	0	0	0	0	0	0	0	0	0	0	0	0	0	0	0
21/08/2015	15:53:00	360	6:00:00	3	132	3	cod	0	0	0	0	0	0	0	0	0	0	0	0	0	0	0
21/08/2015	15:54:00	420	7:00:00	3	132	3	cod	0	0	0	0	0	0	0	0	0	0	0	0	0	0	0
21/08/2015	15:55:00	480	8:00:00	3	132	3	cod	0	0	0	0	0	0	0	0	0	0	0	0	0	0	0
21/08/2015	15:56:00	540	9:00:00	3	132	3	cod	0	0	0	0	0	0	0	0	0	0	0	0	0	0	0
21/08/2015	15:57:00	600	10:00:00	3	132	3	cod	0	0	0	0	0	0	0	0	0	0	0	0	0	0	0
21/08/2015	15:58:00	660	11:00:00	3	132	3	cod	0	0	0	0	0	0	0	0	0	0	0	0	0	0	0
21/08/2015	15:59:00	720	12:00:00	3	132	3	cod	0	0	0	0	0	0	0	0	0	0	0	0	0	0	0
21/08/2015	16:00:00	780	13:00:00	3	132	3	cod	0	0	0	0	0	0	0	0	0	0	0	0	0	0	0
21/08/2015	16:01:00	840	14:00:00	3	132	3	cod	0	0	0	0	0	0	0	0	0	0	0	0	0	0	0
21/08/2015	16:02:00	900	15:00:00	3	132	3	cod	0	0	0	0	0	0	0	0	0	0	0	0	0	0	0
21/08/2015	16:03:00	960	16:00:00	3	132	3	cod	0	0	0	0	0	0	0	0	0	0	0	0	0	0	0
21/08/2015	16:04:00	1020	17:00:00	3	132	3	cod	0	0	0	0	0	0	0	0	0	0	0	0	0	0	0
21/08/2015	16:05:00	1080	18:00:00	3	132	3	cod	0	0	0	0	0	0	0	0	0	0	0	0	0	0	0
21/08/2015	16:06:00	1140	19:00:00	3	132	3	cod	0	0	0	0	0	0	0	0	0	0	0	0	0	0	0
21/08/2015	16:07:00	1200	20:00:00	3	132	3	cod	0	0	0	0	0	0	0	0	0	0	0	0	0	0	0
21/08/2015	16:08:00	1260	21:00:00	3	132	3	sculpin	1	0	0	1	0	0	0	0	0	0	0	0	0	0	0
21/08/2015	16:08:00	1260	21:00:00	3	132	3	cod	0	0	0	0	0	0	0	0	0	0	0	0	0	0	0
21/08/2015	16:09:00	1320	22:00:00	3	132	3	cod	0	0	0	0	0	0	0	0	0	0	0	0	0	0	0
21/08/2015	16:10:00	1380	23:00:00	3	132	3	cod	0	0	0	0	0	0	0	0	0	0	0	0	0	0	0
21/08/2015	16:11:00	1440	1 day, 0:00:00	3	132	3	cod	0	0	0	0	0	0	0	0	0	0	0	0	0	0	0
21/08/2015	16:12:00	1500	1 day, 1:00:00	3	132	3	cod	0	0	0	0	0	0	0	0	0	0	0	0	0	0	0
21/08/2015	16:13:00	1560	1 day, 2:00:00	3	132	3	cod	0	0	0	0	0	0	0	0	0	0	0	0	0	0	0
21/08/2015	16:14:00	1620	1 day, 3:00:00	3	132	3	cod	0	0	0	0	0	0	0	0	0	0	0	0	0	0	0
21/08/2015	16:15:00	1680	1 day, 4:00:00	3	132	3	cod	0	0	0	0	0	0	0	0	0	0	0	0	0	0	0
21/08/2015	16:16:00	1740	1 day, 5:00:00	3	132	3	cod	0	0	0	0	0	0	0	0	0	0	0	0	0	0	0
21/08/2015	16:17:00	1800	1 day, 6:00:00	3	132	3	cod	0	0	0	0	0	0	0	0	0	0	0	0	0	0	0
21/08/2015	16:17:00	1860	1:00:00	3	133	3	tc	1	1	0	0	0	0	0	0	0	0	0	0	0	0	0
21/08/2015	16:17:00	1860	1:00:00	3	133	3	cod	0	0	0	0	0	0	0	0	0	0	0	0	0	0	0
21/08/2015	16:19:00	1920	2:00:00	3	133	3	cod	0	0	0	0	0	0	0	0	0	0	0	0	0	0	0
21/08/2015	16:21:00	1980	3:00:00	3	133	3	cod	0	0	0	0	0	0	0	0	0	0	0	0	0	0	0
21/08/2015	16:23:00	2040	4:00:00	3	133	3	cod	0	0	0	0	0	0	0	0	0	0	0	0	0	0	0
21/08/2015	16:25:00	2100	5:00:00	3	133	3	cod	0	0	0	0	0	0	0	0	0	0	0	0	0	0	0
21/08/2015	16:27:00	2160	6:00:00	3	133	3	cod	0	0	0	0	0	0	0	0	0	0	0	0	0	0	0
21/08/2015	16:29:00	2220	7:00:00	3	133	3	cod	0	0	0	0	0	0	0	0	0	0	0	0	0	0	0
21/08/2015	16:31:00	2280	8:00:00	3	133	3	cod	0	0	0	0	0	0	0	0	0	0	0	0	0	0	0
21/08/2015	16:33:00	2340	9:00:00	3	133	3	cod	0	0	0	0	0	0	0	0	0	0	0	0	0	0	0
21/08/2015	16:35:00	2400	10:00:00	3	133	3	cod	0	0	0	0	0	0	0	0	0	0	0	0	0	0	0
21/08/2015	16:37:00	2460	11:00:00	3	133	3	cod	0	0	0	0	0	0	0	0	0	0	0	0	0	0	0
21/08/2015	16:39:00	2520	12:00:00	3	133	3	cod	0	0	0	0	0	0	0	0	0	0	0	0	0	0	0
21/08/2015	16:41:00	2580	13:00:00	3	133	3	cod	0	0	0	0	0	0	0	0	0	0	0	0	0	0	0
21/08/2015	16:43:00	2640	14:00:00	3	133	3	cod	0	0	0	0	0	0	0	0	0	0	0	0	0	0	0
21/08/2015	16:45:00	2700	15:00:00	3	133	3	cod	0	0	0	0	0	0	0	0	0	0	0	0	0	0	0
21/08/2015	16:47:00	2760	16:00:00	3	133	3	cod	0	0	0	0	0	0	0	0	0	0	0	0	0	0	0
21/08/2015	16:49:00	2820	17:00:00	3	133	3	cod	0	0	0	0	0	0	0	0	0	0	0	0	0	0	0
21/08/2015	16:51:00	2880	18:00:00	3	133	3	cod	0	0	0	0	0	0	0	0	0	0	0	0	0	0	0
21/08/2015	16:53:00	2940	19:00:00	3	133	3	cod	0	0	0	0	0	0	0	0	0	0	0	0	0	0	0
21/08/2015	16:55:00	3000	20:00:00	3	133	3	cod	0	0	0	0	0	0	0	0	0	0	0	0	0	0	0
21/08/2015	16:57:00	3060	21:00:00	3	133	3	cod	0	0	0	0	0	0	0	0	0	0	0	0	0	0	0
21/08/2015	16:59:00	3120	22:00:00	3	133	3	cod	0	0	0	0	0	0	0	0	0	0	0	0	0	0	0
21/08/2015	17:01:00	3180	23:00:00	3	133	3	tc	1	0	1	0	0	0	0	0	0	0	0	0	0	0	0
21/08/2015	17:01:00	3180	23:00:00	3	133	3	cod	1	0	1	0	0	0	0	0	0	0	0	0	0	0	0
21/08/2015	17:03:00	3240	1 day, 0:00:00	3	133	3	cod	0	0	0	0	0	0	0	0	0	0	0	0	0	0	0
21/08/2015	17:05:00	3300	1 day, 1:00:00	3	133	2	cod	2	0	1	0	1	0	0	0	0	0	0	0	0	0	0
21/08/2015	17:07:00	3360	1 day, 2:00:00	3	133	2	cod	0	0	0	0	0	0	0	0	0	0	0	0	0	0	0
21/08/2015	17:09:00	3420	1 day, 3:00:00	3	133	2	cod	0	0	0	0	0	0	0	0	0	0	0	0	0	0	0
21/08/2015	17:11:00	3480	1 day, 4:00:00	3	133	2	cod	0	0	0	0	0	0	0	0	0	0	0	0	0	0	0
21/08/2015	17:13:00	3540	1 day, 5:00:00	3	133	2	sculpin	1	0	1	0	0	0	0	0	0	0	0	0	0	0	0
21/08/2015	17:13:00	3540	1 day, 5:00:00	3	133	2	cod	0	0	0	0	0	0	0	0	0	0	0	0	0	0	0
21/08/2015	17:15:00	3600	1 day, 6:00:00	3	133	2	tc	1	0	1	0	0	0	0	0	0	0	0	0	0	0	0
21/08/2015	17:15:00	3600	1 day, 6:00:00	3	133	2	cod	0	0	0	0	0	0	0	0	0	0	0	0	0	0	0
21/08/2015	17:16:00	3660	1:00:00	3	134	2	cod	0	0	0	0	0	0	0	0	0	0	0	0	0	0	0
21/08/2015	17:17:00	3720	2:00:00	3	134	2	sculpin	1	0	1	0	0	0	0	0	0	0	0	0	0	0	0
21/08/2015	17:17:00	3720	2:00:00	3	134	2	cod	0	0	0	0	0	0	0	0	0	0	0	0	0	0	0
21/08/2015	17:18:00	3780	3:00:00	3	134	2	cod	0	0	0	0	0	0	0	0	0	0	0	0	0	0	0
21/08/2015	17:19:00	3840	4:00:00	3	134	2	tc	1	0	1	0	0	0	0	0	0	0	0	0	0	0	0
21/08/2015	17:19:00	3840	4:00:00	3	134	2	cod	0	0	0	0	0	0	0	0	0	0	0	0	0	0	0
21/08/2015	17:20:00	3900	5:00:00	3	134	2	sculpin	1	0	0	0	0	0	0	0	1	0	0	0	0	0	0
21/08/2015	17:20:00	3900	5:00:00	3	134	2	cod	0	0	0	0	0	0	0	0	0	0	0	0	0	0	0
21/08/2015	17:21:00	3960	6:00:00	3	134	2	tc	1	0	1	0	0	0	0	0	0	0	0	0	0	0	0
21/08/2015	17:21:00	3960	6:00:00	3	134	2	cod	0	0	0	0	0	0	0	0	0	0	0	0	0	0	0
21/08/2015	17:22:00	4020	7:00:00	3	134	2	cod	0	0	0	0	0	0	0	0	0	0	0	0	0	0	0
21/08/2015	17:23:00	4080	8:00:00	3	134	2	sculpin	1	0	0	0	1	0	0	0	0	0	0	0	0	0	0
21/08/2015	17:23:00	4080	8:00:00	3	134	2	cod	0	0	0	0	0	0	0	0	0	0	0	0	0	0	0
21/08/2015	17:24:00	4140	9:00:00	3	134	2	cod	0	0	0	0	0	0	0	0	0	0	0	0	0	0	0
21/08/2015	17:25:00	4200	10:00:00	3	134	2	cod	0	0	0	0	0	0	0	0	0	0	0	0	0	0	0
21/08/2015	17:26:00	4260	11:00:00	3	134	2	cod	0	0	0	0	0	0	0	0	0	0	0	0	0	0	0
21/08/2015	17:27:00	4320	12:00:00	3	134	2	cod	0	0	0	0	0	0	0	0	0	0	0	0	0	0	0
21/08/2015	17:28:00	4380	13:00:00	3	134	2	cod	0	0	0	0	0	0	0	0	0	0	0	0	0	0	0
21/08/2015	17:29:00	4440	14:00:00	3	134	2	cod	0	0	0	0	0	0	0	0	0	0	0	0	0	0	0
21/08/2015	17:30:00	4500	15:00:00	3	134	2	cod	0	0	0	0	0	0	0	0	0	0	0	0	0	0	0
21/08/2015	17:31:00	4560	16:00:00	3	134	2	cod	0	0	0	0	0	0	0	0	0	0	0	0	0	0	0
21/08/2015	17:32:00	4620	17:00:00	3	134	2	cod	0	0	0	0	0	0	0	0	0	0	0	0	0	0	0
21/08/2015	17:33:00	4680	18:00:00	3	134	2	cod	0	0	0	0	0	0	0	0	0	0	0	0	0	0	0
21/08/2015	17:34:00	4740	19:00:00	3	134	2	cod	2	0	2	0	0	0	0	0	0	0	0	0	0	0	0
21/08/2015	17:35:00	4800	20:00:00	3	134	2	tc	1	0	1	0	0	0	0	0	0	0	0	0	0	0	0
21/08/2015	17:35:00	4800	20:00:00	3	134	2	cod	0	0	0	0	0	0	0	0	0	1	0	1	0	0	0
21/08/2015	17:36:00	4860	21:00:00	3	134	2	cod	0	0	0	0	0	0	0	0	0	0	0	0	0	1	0
21/08/2015	17:37:00	4920	22:00:00	3	134	2	tc	0	0	0	0	0	0	0	0	0	2	0	2	0	0	0
21/08/2015	17:37:00	4980	22:00:00	3	134	2	cod	0	0	0	0	0	0	0	0	0	1	0	1	0	1	0
21/08/2015	17:38:00	5040	23:00:00	3	134	2	cod	0	0	0	0	0	0	0	0	0	0	0	0	0	0	0
21/08/2015	17:39:00	5100	1 day, 0:00:00	3	134	2	tc	1	0	0	1	0	0	0	0	0	0	0	0	0	0	0
21/08/2015	17:39:00	5100	1 day, 0:00:00	3	134	2	sculpin	1	0	1	0	0	0	0	0	0	0	0	0	0	0	0
21/08/2015	17:39:00	5100	1 day, 0:00:00	3	134	2	cod	0	0	0	0	0	0	0	0	0	0	0	0	0	0	0
21/08/2015	17:40:00	5160	1 day, 1:00:00	3	134	2	tc	0	0	0	0	0	0	0	0	0	0	0	0	1	0	0
21/08/2015	17:40:00	5220	1 day, 1:00:00	3	134	2	cod	1	0	1	0	0	0	0	0	0	0	0	0	0	0	0
21/08/2015	17:41:00	5280	1 day, 2:00:00	3	134	2	cod	1	0	0	0	1	0	0	0	0	0	0	0	0	0	0
21/08/2015	17:42:00	5340	1 day, 3:00:00	3	134	2	tc	0	0	0	0	0	0	0	0	0	0	0	0	1	0	0
21/08/2015	17:42:00	5340	1 day, 3:00:00	3	134	2	cod	0	0	0	0	0	0	0	0	0	0	0	0	0	0	0
21/08/2015	17:43:00	5400	1 day, 4:00:00	3	134	2	tc	1	0	1	0	0	0	0	0	0	0	0	0	0	0	0
21/08/2015	17:43:00	5400	1 day, 4:00:00	3	134	2	cod	0	0	0	0	0	0	0	0	0	0	0	0	0	0	0
21/08/2015	17:44:00	5460	1 day, 5:00:00	3	134	2	cod	0	0	0	0	0	0	0	0	0	0	0	0	0	0	0
21/08/2015	17:45:00	5520	1 day, 6:00:00	3	134	2	cod	0	0	0	0	0	0	0	0	0	0	0	0	0	0	0
21/08/2015	17:46:00	5580	1:00:00	3	135	2	tc	1	0	1	0	0	0	0	0	0	0	0	0	0	0	0
21/08/2015	17:46:00	5580	1:00:00	3	135	2	cod	1	0	0	1	0	0	0	0	0	1	0	1	0	0	0
21/08/2015	17:47:00	5640	2:00:00	3	135	2	cod	0	0	0	0	0	0	0	0	0	1	0	1	0	2	0
21/08/2015	17:48:00	5700	3:00:00	3	135	2	cod	1	1	0	0	0	0	0	0	0	0	0	0	0	0	0
21/08/2015	17:49:00	5760	4:00:00	3	135	2	cod	0	0	0	0	0	0	0	0	0	1	0	1	0	1	0
21/08/2015	17:50:00	5820	5:00:00	3	135	2	cod	0	0	0	0	0	0	0	0	0	2	0	2	0	2	0
21/08/2015	17:51:00	5880	6:00:00	3	135	2	cod	0	0	0	0	0	0	0	0	0	0	0	0	0	0	0
21/08/2015	17:52:00	5940	7:00:00	3	135	2	tc	1	1	0	0	0	0	0	0	0	0	0	0	0	0	0
21/08/2015	17:52:00	5940	7:00:00	3	135	2	cod	0	0	0	0	0	0	0	0	0	0	0	0	0	0	0
21/08/2015	17:53:00	6000	8:00:00	3	135	2	cod	0	0	0	0	0	0	0	0	0	0	0	0	0	0	0
21/08/2015	17:54:00	6060	9:00:00	3	135	2	cod	0	0	0	0	0	0	0	0	0	1	1	0	0	1	0	Entrances Up until now were the same signle fish - Good Video example
21/08/2015	17:55:00	6120	10:00:00	3	135	2	cod	0	0	0	0	0	0	0	0	0	0	0	0	0	0	0
21/08/2015	17:56:00	6180	11:00:00	3	135	2	cod	0	0	0	0	0	0	0	0	0	0	0	0	0	0	0
21/08/2015	17:57:00	6240	12:00:00	3	135	2	cod	0	0	0	0	0	0	0	0	0	0	0	0	0	0	0
21/08/2015	17:58:00	6300	13:00:00	3	135	2	cod	0	0	0	0	0	0	0	0	0	0	0	0	0	0	0
21/08/2015	17:59:00	6360	14:00:00	3	135	2	cod	0	0	0	0	0	0	0	0	0	0	0	0	0	0	0
21/08/2015	18:00:00	6420	15:00:00	3	135	2	tc	1	0	1	0	0	0	0	0	0	0	0	0	0	0	0
21/08/2015	18:00:00	6420	15:00:00	3	135	2	cod	0	0	0	0	0	0	0	0	0	0	0	0	0	0	0
21/08/2015	18:01:00	6480	16:00:00	3	135	2	tc	1	0	1	0	0	0	0	0	0	0	0	0	0	0	0
21/08/2015	18:01:00	6480	16:00:00	3	135	2	cod	0	0	0	0	0	0	0	0	0	0	0	0	0	0	0
21/08/2015	18:02:00	6540	17:00:00	3	135	2	cod	0	0	0	0	0	0	0	0	0	0	0	0	0	0	0
21/08/2015	18:03:00	6600	18:00:00	3	135	2	cod	0	0	0	0	0	0	0	0	0	0	0	0	0	0	0
21/08/2015	18:04:00	6660	19:00:00	3	135	2	cod	0	0	0	0	0	0	0	0	0	0	0	0	0	0	0
21/08/2015	18:05:00	6720	20:00:00	3	135	2	sculpin	1	0	0	0	1	0	0	0	0	0	0	0	0	0	0
21/08/2015	18:05:00	6720	20:00:00	3	135	2	cod	1	0	0	0	1	0	0	0	0	0	0	0	0	0	0
21/08/2015	18:06:00	6780	21:00:00	3	135	2	tc	1	0	0	1	0	0	0	0	0	0	0	0	0	0	0
21/08/2015	18:06:00	6780	21:00:00	3	135	2	cod	1	0	0	1	0	0	0	0	0	0	0	0	0	0	0
21/08/2015	18:07:00	6840	22:00:00	3	135	2	cod	0	0	0	0	0	0	0	0	0	0	0	0	0	0	0
21/08/2015	18:08:00	6900	23:00:00	3	135	2	cod	0	0	0	0	0	0	0	0	0	0	0	0	0	0	0
21/08/2015	18:09:00	6960	1 day, 0:00:00	3	135	2	cod	0	0	0	0	0	0	0	0	0	0	0	0	0	0	0
21/08/2015	18:10:00	7020	1 day, 1:00:00	3	135	2	cod	0	0	0	0	0	0	0	0	0	0	0	0	0	0	0
21/08/2015	18:11:00	7080	1 day, 2:00:00	3	135	2	cod	0	0	0	0	0	0	0	0	0	0	0	0	0	0	0
21/08/2015	18:12:00	7140	1 day, 3:00:00	3	135	2	tc	1	0	0	1	0	0	0	0	0	0	0	0	0	0	0
21/08/2015	18:12:00	7140	1 day, 3:00:00	3	135	2	cod	0	0	0	0	0	0	0	0	0	0	0	0	0	0	0
21/08/2015	18:13:00	7200	1 day, 4:00:00	3	135	3	cod	0	0	0	0	0	0	0	0	0	0	0	0	0	0	0
21/08/2015	18:14:00	7260	1 day, 5:00:00	3	135	3	cod	0	0	0	0	0	0	0	0	0	0	0	0	0	0	0
21/08/2015	18:15:00	7320	1 day, 6:00:00	3	135	3	cod	0	0	0	0	0	0	0	0	0	0	0	0	0	0	0
21/08/2015	18:16:00	7380	1:00:00	3	136	3	cod	0	0	0	0	0	0	0	0	0	0	0	0	0	0	0
21/08/2015	18:17:00	7440	2:00:00	3	136	3	cod	0	0	0	0	0	0	0	0	0	0	0	0	0	0	0
21/08/2015	18:18:00	7500	3:00:00	3	136	3	cod	0	0	0	0	0	0	0	0	0	0	0	0	0	0	0
21/08/2015	18:19:00	7560	4:00:00	3	136	3	cod	0	0	0	0	0	0	0	0	0	0	0	0	0	0	0
21/08/2015	18:20:00	7620	5:00:00	3	136	3	cod	0	0	0	0	0	0	0	0	0	0	0	0	0	0	0
21/08/2015	18:21:00	7680	6:00:00	3	136	3	cod	0	0	0	0	0	0	0	0	0	0	0	0	0	0	0
21/08/2015	18:22:00	7740	7:00:00	3	136	3	cod	0	0	0	0	0	0	0	0	0	0	0	0	0	0	0
21/08/2015	18:23:00	7800	8:00:00	3	136	3	cod	0	0	0	0	0	0	0	0	0	0	0	0	0	0	0
21/08/2015	18:24:00	7860	9:00:00	3	136	3	cod	0	0	0	0	0	0	0	0	0	0	0	0	0	0	0
21/08/2015	18:25:00	7920	10:00:00	3	136	3	tc	1	0	1	0	0	0	0	0	0	0	0	0	0	0	0	4:20 Small Fish Swims Through Mesh
21/08/2015	18:25:00	7920	10:00:00	3	136	3	sculpin	1	0	0	1	0	0	0	0	0	0	0	0	0	0	0
21/08/2015	18:25:00	7920	10:00:00	3	136	3	cod	0	0	0	0	0	0	0	0	0	0	0	0	0	0	0
21/08/2015	18:26:00	7980	11:00:00	3	136	3	cod	0	0	0	0	0	0	0	0	0	0	0	0	0	0	0
21/08/2015	18:27:00	8040	12:00:00	3	136	3	cod	0	0	0	0	0	0	0	0	0	0	0	0	0	0	0
21/08/2015	18:28:00	8100	13:00:00	3	136	3	cod	0	0	0	0	0	0	0	0	0	0	0	0	0	0	0
21/08/2015	18:29:00	8160	14:00:00	3	136	3	cod	0	0	0	0	0	0	0	0	0	0	0	0	0	0	0
21/08/2015	18:30:00	8220	15:00:00	3	136	3	cod	0	0	0	0	0	0	0	0	0	0	0	0	0	0	0
21/08/2015	18:31:00	8280	16:00:00	3	136	3	cod	0	0	0	0	0	0	0	0	0	0	0	0	0	0	0
21/08/2015	18:32:00	8340	17:00:00	3	136	3	cod	0	0	0	0	0	0	0	0	0	0	0	0	0	0	0
21/08/2015	18:33:00	8400	18:00:00	3	136	3	cod	0	0	0	0	0	0	0	0	0	0	0	0	0	0	0
21/08/2015	18:34:00	8460	19:00:00	3	136	3	cod	0	0	0	0	0	0	0	0	0	0	0	0	0	0	0
21/08/2015	18:35:00	8520	20:00:00	3	136	3	cod	0	0	0	0	0	0	0	0	0	0	0	0	0	0	0
21/08/2015	18:36:00	8580	21:00:00	3	136	3	cod	0	0	0	0	0	0	0	0	0	0	0	0	0	0	0
21/08/2015	18:37:00	8640	22:00:00	3	136	3	cod	0	0	0	0	0	0	0	0	0	0	0	0	0	0	0
21/08/2015	18:38:00	8700	23:00:00	3	136	3	cod	1	0	0	0	1	0	0	0	0	0	0	0	0	0	0
21/08/2015	18:39:00	8760	1 day, 0:00:00	3	136	3	cod	0	0	0	0	0	0	0	0	0	0	0	0	0	0	0
21/08/2015	18:40:00	8820	1 day, 1:00:00	3	136	3	cod	0	0	0	0	0	0	0	0	0	0	0	0	0	0	0
21/08/2015	18:41:00	8880	1 day, 2:00:00	3	136	3	cod	0	0	0	0	0	0	0	0	0	0	0	0	0	0	0
21/08/2015	18:42:00	8940	1 day, 3:00:00	3	136	3	cod	1	0	0	0	0	1	0	0	0	0	0	0	0	0	0
21/08/2015	18:43:00	9000	1 day, 4:00:00	3	136	3	cod	2	0	0	0	1	1	0	0	0	0	0	0	0	0	0
21/08/2015	18:44:00	9060	1 day, 5:00:00	3	136	3	cod	0	0	0	0	0	0	0	0	0	0	0	0	0	0	0
21/08/2015	18:45:00	9120	1 day, 6:00:00	3	136	3	cod	0	0	0	0	0	0	0	0	0	0	0	0	0	0	0
21/08/2015	18:46:00	9180	1:00:00	3	137	3	cod	1	0	0	1	0	0	0	0	0	0	0	0	0	0	0
21/08/2015	18:47:00	9240	2:00:00	3	137	3	cod	0	0	0	0	0	0	0	0	0	0	0	0	0	0	0
21/08/2015	18:48:00	9300	3:00:00	3	137	3	cod	0	0	0	0	0	0	0	0	0	0	0	0	0	0	0
21/08/2015	18:49:00	9360	4:00:00	3	137	3	cod	0	0	0	0	0	0	0	0	0	0	0	0	0	0	0
21/08/2015	18:50:00	9420	5:00:00	3	137	3	cod	2	0	1	0	1	0	0	0	0	1	1	0	1	0	0	Fish goes from downstream to upstream entrance to enter
21/08/2015	18:51:00	9480	6:00:00	3	137	3	cod	0	0	0	0	0	0	0	0	0	0	0	0	0	0	0
21/08/2015	18:52:00	9540	7:00:00	3	137	3	tc	2	2	0	0	0	0	0	0	0	0	0	0	0	0	0
21/08/2015	18:52:00	9540	7:00:00	3	137	3	cod	0	0	0	0	0	0	0	0	0	0	0	0	0	0	0
21/08/2015	18:53:00	9600	8:00:00	3	137	3	cod	0	0	0	0	0	0	0	0	0	0	0	0	0	0	0
21/08/2015	18:54:00	9660	9:00:00	3	137	3	cod	0	0	0	0	0	0	0	0	0	0	0	0	0	0	0	9 Min Video
21/08/2015	18:55:00	9720	1:00:00	3	138	3	cod	1	0	0	0	0	0	0	1	0	0	0	0	0	0	0
21/08/2015	18:56:00	9780	2:00:00	3	138	3	tc	1	1	0	0	0	0	0	0	0	0	0	0	0	0	0	Fish Breaks Through mesh
21/08/2015	18:56:00	9780	2:00:00	3	138	3	cod	0	0	0	0	0	0	0	0	0	0	0	0	0	0	1
21/08/2015	18:57:00	9840	3:00:00	3	138	3	cod	1	0	0	0	0	1	0	0	0	0	0	0	0	0	0
21/08/2015	18:58:00	9900	4:00:00	3	138	3	cod	0	0	0	0	0	0	0	0	0	0	0	0	0	0	0
21/08/2015	18:59:00	9960	5:00:00	3	138	3	cod	2	0	1	0	0	0	0	1	0	0	0	0	0	0	0
21/08/2015	19:00:00	10020	6:00:00	3	138	3	cod	0	0	0	0	0	0	0	0	0	0	0	0	0	0	0
21/08/2015	19:01:00	10080	7:00:00	3	138	3	cod	0	0	0	0	0	0	0	0	0	0	0	0	0	0	0
21/08/2015	19:02:00	10140	8:00:00	3	138	3	cod	0	0	0	0	0	0	0	0	0	0	0	0	0	0	0
21/08/2015	19:03:00	10200	9:00:00	3	138	3	cod	0	0	0	0	0	0	0	0	0	0	0	0	0	0	0
21/08/2015	19:04:00	10260	10:00:00	3	138	3	cod	0	0	0	0	0	0	0	0	0	0	0	0	0	0	0
21/08/2015	19:05:00	10320	11:00:00	3	138	3	cod	0	0	0	0	0	0	0	0	0	0	0	0	0	0	0
21/08/2015	19:06:00	10380	12:00:00	3	138	3	cod	3	0	1	1	0	1	0	0	0	0	0	0	0	0	0
21/08/2015	19:07:00	10440	13:00:00	3	138	3	cod	3	0	1	0	2	0	0	0	0	0	0	0	0	0	0
21/08/2015	19:08:00	10500	14:00:00	3	138	3	cod	0	0	0	0	0	0	0	0	0	0	0	0	0	0	0
21/08/2015	19:09:00	10560	15:00:00	3	138	3	cod	0	0	0	0	0	0	0	0	0	0	0	0	0	0	0
21/08/2015	19:10:00	10620	16:00:00	3	138	3	cod	0	0	0	0	0	0	0	0	0	0	0	0	0	0	0
21/08/2015	19:11:00	10680	17:00:00	3	138	3	cod	1	1	0	0	0	0	0	0	0	0	0	0	0	0	0
21/08/2015	19:12:00	10740	18:00:00	3	138	3	cod	0	0	0	0	0	0	0	0	0	0	0	0	0	0	0
21/08/2015	19:13:00	10800	19:00:00	3	138	3	cod	1	1	0	0	0	0	0	0	0	0	0	0	0	0	0
21/08/2015	19:14:00	10860	20:00:00	3	138	3	cod	0	0	0	0	0	0	0	0	0	0	0	0	0	0	0
21/08/2015	19:15:00	10920	21:00:00	3	138	3	cod	0	0	0	0	0	0	0	0	0	0	0	0	0	0	0
21/08/2015	19:16:00	10980	22:00:00	3	138	3	cod	0	0	0	0	0	0	0	0	0	0	0	0	0	0	0
21/08/2015	19:17:00	11040	23:00:00	3	138	3	cod	0	0	0	0	0	0	0	0	0	0	0	0	0	0	0
21/08/2015	19:18:00	11100	1 day, 0:00:00	3	138	3	cod	0	0	0	0	0	0	0	0	0	0	0	0	0	0	0
21/08/2015	19:19:00	11160	1 day, 1:00:00	3	138	3	cod	2	0	1	0	0	0	0	0	1	0	0	0	0	0	0
21/08/2015	19:20:00	11220	1 day, 2:00:00	3	138	3	cod	2	0	1	1	0	0	0	0	0	0	0	0	0	0	0
21/08/2015	19:21:00	11280	1 day, 3:00:00	3	138	3	cod	2	0	0	0	1	1	0	0	0	0	0	0	0	0	0
21/08/2015	19:22:00	11340	1 day, 4:00:00	3	138	3	cod	0	0	0	0	0	0	0	0	0	0	0	0	0	0	0
21/08/2015	19:23:00	11400	1 day, 5:00:00	3	138	3	cod	3	1	0	0	1	0	1	0	0	0	0	0	0	0	0
21/08/2015	19:24:00	11460	1 day, 6:00:00	3	138	3	cod	3	2	0	0	0	1	0	0	0	0	0	0	0	0	0
21/08/2015	19:25:00	11520	1:00:00	3	139	3	cod	2	0	2	0	0	0	0	0	0	0	0	0	0	0	0	Lots of water movement + dark video - Hard to tell water directions
21/08/2015	19:26:00	11580	2:00:00	3	139	3	cod	0	0	0	0	0	0	0	0	0	0	0	0	0	0	0
21/08/2015	19:27:00	11640	3:00:00	3	139	3	cod	1	0	0	0	0	0	0	0	0	0	0	0	0	0	0
21/08/2015	19:28:00	11700	4:00:00	3	139	3	tc	1	0	0	0	0	0	1	0	0	0	0	0	0	0	0
21/08/2015	19:28:00	11700	4:00:00	3	139	3	cod	0	0	0	0	0	0	0	0	0	0	0	0	0	0	0
21/08/2015	19:29:00	11760	5:00:00	3	139	3	cod	1	0	0	1	0	0	0	0	0	0	0	0	0	0	0
21/08/2015	19:30:00	11820	6:00:00	3	139	3	cod	1	0	1	0	0	0	0	0	0	0	0	0	0	0	0
21/08/2015	19:31:00	11880	7:00:00	3	139	1	tc	1	1	0	0	0	0	0	0	0	0	0	0	0	0	0
21/08/2015	19:31:00	11880	7:00:00	3	139	1	cod	0	0	0	0	0	0	0	0	0	0	0	0	0	0	0
21/08/2015	19:32:00	11940	8:00:00	3	139	1	cod	0	0	0	0	0	0	0	0	0	0	0	0	0	0	0
21/08/2015	19:33:00	12000	9:00:00	3	139	8	cod	4	2	0	0	0	0	1	1	0	0	0	0	0	0	0
21/08/2015	19:34:00	12060	10:00:00	3	139	8	cod	2	1	0	0	0	0	0	0	1	0	0	0	0	0	0
21/08/2015	19:35:00	12120	11:00:00	3	139	7	cod	0	0	0	0	0	0	0	0	0	0	0	0	0	0	0
21/08/2015	19:36:00	12180	12:00:00	3	139	7	tc	1	1	0	0	0	0	0	0	0	0	0	0	0	0	0
21/08/2015	19:36:00	12180	12:00:00	3	139	7	cod	0	0	0	0	0	0	0	0	0	0	0	0	0	0	0
21/08/2015	19:37:00	12240	13:00:00	3	139	7	cod	0	0	0	0	0	0	0	0	0	0	0	0	0	0	0
21/08/2015	19:38:00	12300	14:00:00	3	139	3	cod	0	0	0	0	0	0	0	0	0	0	0	0	0	0	0
21/08/2015	19:39:00	12360	15:00:00	3	139	3	cod	0	0	0	0	0	0	0	0	0	0	0	0	0	0	0
21/08/2015	19:40:00	12420	16:00:00	3	139	1	cod	1	1	0	0	0	0	0	0	0	0	0	0	0	0	0
21/08/2015	19:41:00	12480	17:00:00	3	139	1	cod	0	0	0	0	0	0	0	0	0	0	0	0	0	0	0
21/08/2015	19:42:00	12540	18:00:00	3	139	1	cod	0	0	0	0	0	0	0	0	0	0	0	0	0	0	0
21/08/2015	19:43:00	12600	19:00:00	3	139	3	tc	1	1	0	0	0	0	0	0	0	0	0	0	0	0	0
21/08/2015	19:43:00	12600	19:00:00	3	139	3	cod	1	1	0	0	0	0	0	0	0	0	0	0	0	0	0
21/08/2015	19:44:00	12660	20:00:00	3	139	4	cod	0	0	0	0	0	0	0	0	0	0	0	0	0	0	0
21/08/2015	19:45:00	12720	21:00:00	3	139	4	cod	1	0	0	0	1	0	0	0	0	0	0	0	0	0	0
21/08/2015	19:46:00	12780	22:00:00	3	139	4	cod	0	0	0	0	0	0	0	0	0	0	0	0	0	0	0
21/08/2015	19:47:00	12840	23:00:00	3	139	4	cod	0	0	0	0	0	0	0	0	0	0	0	0	0	0	0
21/08/2015	19:48:00	12900	1 day, 0:00:00	3	139	4	cod	0	0	0	0	0	0	0	0	0	0	0	0	0	0	0
21/08/2015	19:49:00	12960	1 day, 1:00:00	3	139	6	tc	1	0	1	0	0	0	0	0	0	0	0	0	0	0	0
21/08/2015	19:49:00	12960	1 day, 1:00:00	3	139	6	cod	0	0	0	0	0	0	0	0	0	0	0	0	0	0	0
21/08/2015	19:50:00	13020	1 day, 2:00:00	3	139	6	cod	0	0	0	0	0	0	0	0	0	0	0	0	0	0	0
21/08/2015	19:51:00	13080	1 day, 3:00:00	3	139	6	cod	0	0	0	0	0	0	0	0	0	0	0	0	0	0	0
21/08/2015	19:52:00	13140	1 day, 4:00:00	3	139	6	cod	6	0	1	0	4	0	1	0	0	0	0	0	0	0	0
21/08/2015	19:53:00	13200	1 day, 5:00:00	3	139	6	cod	0	0	0	0	0	0	0	0	0	0	0	0	0	0	0
21/08/2015	19:54:00	13260	1 day, 6:00:00	3	139	6	cod	0	0	0	0	0	0	0	0	0	0	0	0	0	0	0
22/08/2015	7:39:00	55560	1:00:00	3	167	7	cod	0	0	0	0	0	0	0	0	0	0	0	0	0	0	0
22/08/2015	7:40:00	55620	2:00:00	3	167	7	cod	1	0	0	0	0	0	0	1	0	0	0	0	0	0	0
22/08/2015	7:41:00	55680	3:00:00	3	167	7	cod	2	0	0	0	0	0	0	2	0	0	0	0	0	0	0
22/08/2015	7:42:00	55740	4:00:00	3	167	7	cod	3	1	0	0	0	0	1	1	0	0	0	0	0	0	0
22/08/2015	7:43:00	55800	5:00:00	3	167	7	cod	0	0	0	0	0	0	0	0	0	0	0	0	0	0	0
22/08/2015	7:44:00	55860	6:00:00	3	167	7	cod	0	0	0	0	0	0	0	0	0	0	0	0	0	0	0
22/08/2015	7:45:00	55920	7:00:00	3	167	7	cod	1	0	0	0	1	0	0	0	0	0	0	0	0	0	0
22/08/2015	7:46:00	55980	8:00:00	3	167	7	cod	0	0	0	0	0	0	0	0	0	0	0	0	0	0	0
22/08/2015	7:47:00	56040	9:00:00	3	167	7	cod	0	0	0	0	0	0	0	0	0	0	0	0	0	0	0	9 min video
22/08/2015	7:48:00	56100	1:00:00	3	168	7	cod	1	0	0	0	0	0	0	1	0	0	0	0	0	0	0
22/08/2015	7:49:00	56160	2:00:00	3	168	7	sculpin	1	0	0	0	0	0	1	0	0	0	0	0	0	0	0
22/08/2015	7:49:00	56160	2:00:00	3	168	7	cod	1	0	0	0	0	0	0	0	1	0	0	0	0	0	0
22/08/2015	7:50:00	56220	3:00:00	3	168	7	cod	2	0	0	0	0	0	0	2	0	0	0	0	0	0	0
22/08/2015	7:51:00	56280	4:00:00	3	168	7	cod	2	0	0	0	0	0	0	2	0	0	0	0	0	0	0
22/08/2015	7:52:00	56340	5:00:00	3	168	7	cod	0	0	0	0	0	0	0	0	0	0	0	0	0	0	0
22/08/2015	7:53:00	56400	6:00:00	3	168	7	cod	2	0	0	0	0	1	0	1	0	0	0	0	0	0	0
22/08/2015	7:54:00	56460	7:00:00	3	168	7	cod	4	0	0	0	0	1	3	0	0	0	0	0	0	0	0
22/08/2015	7:55:00	56520	8:00:00	3	168	7	cod	0	0	0	0	0	0	0	0	0	0	0	0	0	0	0
22/08/2015	7:56:00	56580	9:00:00	3	168	7	cod	1	0	0	0	0	1	0	0	0	0	0	0	0	0	0
22/08/2015	7:57:00	56640	10:00:00	3	168	7	sculpin	1	0	0	0	1	0	0	0	0	0	0	0	0	0	0
22/08/2015	7:57:00	56640	10:00:00	3	168	7	cod	0	0	0	0	0	0	0	0	0	0	0	0	0	0	0
22/08/2015	7:58:00	56700	11:00:00	3	168	7	cod	0	0	0	0	0	0	0	0	0	0	0	0	0	0	0
22/08/2015	7:59:00	56760	12:00:00	3	168	7	cod	2	0	1	0	0	0	1	0	0	0	0	0	0	0	0
22/08/2015	8:00:00	56820	13:00:00	3	168	7	cod	2	0	0	0	0	1	1	0	0	0	0	0	0	0	0
22/08/2015	8:01:00	56880	14:00:00	3	168	7	cod	3	0	0	0	1	2	0	0	0	0	0	0	0	0	0
22/08/2015	8:02:00	56940	15:00:00	3	168	7	tc	1	0	0	0	0	1	0	0	0	0	0	0	0	0	0
22/08/2015	8:02:00	56940	15:00:00	3	168	7	cod	0	0	0	0	0	0	0	0	0	0	0	0	0	0	0
22/08/2015	8:03:00	57000	16:00:00	3	168	7	cod	2	0	2	0	0	0	0	0	0	0	0	0	0	0	0
22/08/2015	8:04:00	57060	17:00:00	3	168	7	cod	3	0	1	0	0	0	1	0	1	0	0	0	0	0	0
22/08/2015	8:05:00	57120	18:00:00	3	168	7	cod	1	0	0	1	0	0	0	0	0	0	0	0	0	0	0
22/08/2015	8:06:00	57180	19:00:00	3	168	7	cod	1	0	0	0	0	0	0	0	1	0	0	0	0	0	0
22/08/2015	8:07:00	57240	20:00:00	3	168	7	cod	0	0	0	0	0	0	0	0	0	0	0	0	0	0	0
22/08/2015	8:08:00	57300	21:00:00	3	168	7	cod	1	0	1	0	0	0	0	0	0	0	0	0	0	0	0
22/08/2015	8:09:00	57360	22:00:00	3	168	7	cod	0	0	0	0	0	0	0	0	0	0	0	0	0	0	0
22/08/2015	8:10:00	57420	23:00:00	3	168	7	cod	0	0	0	0	0	0	0	0	0	0	0	0	0	0	0
22/08/2015	8:11:00	57480	1 day, 0:00:00	3	168	7	cod	0	0	0	0	0	0	0	0	0	0	0	0	0	0	0
22/08/2015	8:12:00	57540	1 day, 1:00:00	3	168	7	cod	2	0	0	0	0	0	0	2	0	0	0	0	0	0	0
22/08/2015	8:13:00	57600	1 day, 2:00:00	3	168	7	cod	2	0	0	0	0	0	2	0	0	0	0	0	0	0	0
22/08/2015	8:14:00	57660	1 day, 3:00:00	3	168	7	cod	3	0	0	0	0	0	1	1	1	0	0	0	0	0	0
22/08/2015	8:15:00	57720	1 day, 4:00:00	3	168	7	sculpin	1	0	0	0	0	0	0	1	0	0	0	0	0	0	0
22/08/2015	8:15:00	57720	1 day, 4:00:00	3	168	7	cod	1	0	0	0	0	1	0	0	0	0	0	0	0	0	0
22/08/2015	8:16:00	57780	1 day, 5:00:00	3	168	7	cod	0	0	0	0	0	0	0	0	0	0	0	0	0	0	0
22/08/2015	8:17:00	57840	1 day, 6:00:00	3	168	7	cod	3	0	0	0	0	0	0	3	0	1	1	0	1	0	0
22/08/2015	8:18:00	57900	1:00:00	3	169	7	cod	1	0	0	0	0	0	0	1	0	0	0	0	0	0	1
22/08/2015	8:19:00	57960	2:00:00	3	169	7	cod	2	0	1	0	0	1	0	0	0	0	0	0	0	0	0
22/08/2015	8:20:00	58020	3:00:00	3	169	7	cod	3	0	0	0	0	1	0	2	0	0	0	0	0	0	0
22/08/2015	8:21:00	58080	4:00:00	3	169	7	cod	4	0	0	1	0	0	3	0	0	0	0	0	0	0	0
22/08/2015	8:22:00	58140	5:00:00	3	169	7	cod	2	0	0	0	0	0	2	0	0	1	1	0	0	0	0
22/08/2015	8:23:00	58200	6:00:00	3	169	7	cod	1	0	0	0	0	0	1	0	0	0	0	0	0	0	0
22/08/2015	8:24:00	58260	7:00:00	3	169	6	cod	5	0	0	0	0	1	3	0	1	0	0	0	0	0	0
22/08/2015	8:25:00	58320	8:00:00	3	169	6	cod	2	0	0	0	0	0	2	0	0	0	0	0	0	0	0
22/08/2015	8:26:00	58380	9:00:00	3	169	6	cod	2	0	0	0	0	0	1	0	1	0	0	0	0	0	0
22/08/2015	8:27:00	58440	10:00:00	3	169	6	cod	1	0	0	0	0	0	1	0	0	0	0	0	0	0	0
22/08/2015	8:28:00	58500	11:00:00	3	169	6	cod	2	1	0	0	0	0	0	1	0	0	0	0	0	0	0
22/08/2015	8:29:00	58560	12:00:00	3	169	6	cod	2	0	0	0	0	1	0	1	0	0	0	0	0	0	0
22/08/2015	8:30:00	58620	13:00:00	3	169	6	cod	0	0	0	0	0	0	0	0	0	0	0	0	0	0	0
22/08/2015	8:31:00	58680	14:00:00	3	169	6	cod	0	0	0	0	0	0	0	0	0	0	0	0	0	0	0
22/08/2015	8:32:00	58740	15:00:00	3	169	7	cod	0	0	0	0	0	0	0	0	0	0	0	0	0	0	0
22/08/2015	8:33:00	58800	16:00:00	3	169	7	cod	0	0	0	0	0	0	0	0	0	0	0	0	0	0	0
22/08/2015	8:34:00	58860	17:00:00	3	169	7	cod	0	0	0	0	0	0	0	0	0	0	0	0	0	0	0
22/08/2015	8:35:00	58920	18:00:00	3	169	7	cod	0	0	0	0	0	0	0	0	0	0	0	0	0	0	0
22/08/2015	8:36:00	58980	19:00:00	3	169	7	tc	1	0	0	0	0	0	0	1	0	0	0	0	0	0	0
22/08/2015	8:36:00	58980	19:00:00	3	169	7	sculpin	1	0	0	0	1	0	0	0	0	0	0	0	0	0	0
22/08/2015	8:36:00	58980	19:00:00	3	169	7	cod	0	0	0	0	0	0	0	0	0	0	0	0	0	0	0
22/08/2015	8:37:00	59040	20:00:00	3	169	7	cod	1	1	0	0	0	0	0	0	0	0	0	0	0	0	0
22/08/2015	8:38:00	59100	21:00:00	3	169	7	cod	0	0	0	0	0	0	0	0	0	0	0	0	0	0	0
22/08/2015	8:39:00	59160	22:00:00	3	169	7	cod	1	0	0	0	0	0	0	1	0	0	0	0	0	0	0
22/08/2015	8:40:00	59220	23:00:00	3	169	7	cod	0	0	0	0	0	0	0	0	0	0	0	0	0	0	0
22/08/2015	8:41:00	59280	1 day, 0:00:00	3	169	7	sculpin	1	0	0	0	1	0	0	0	0	0	0	0	0	0	0
22/08/2015	8:41:00	59280	1 day, 0:00:00	3	169	7	cod	1	0	0	0	1	0	0	0	0	0	0	0	0	0	0
22/08/2015	8:42:00	59340	1 day, 1:00:00	3	169	7	sculpin	1	0	0	0	0	0	0	0	1	0	0	0	0	0	0
22/08/2015	8:42:00	59340	1 day, 1:00:00	3	169	7	cod	2	0	0	0	0	0	0	2	0	0	0	0	0	0	0
22/08/2015	8:43:00	59400	1 day, 2:00:00	3	169	7	cod	0	0	0	0	0	0	0	0	0	0	0	0	0	0	0
22/08/2015	8:44:00	59460	1 day, 3:00:00	3	169	7	cod	1	0	0	0	0	0	1	0	0	0	0	0	0	0	0
22/08/2015	8:45:00	59520	1 day, 4:00:00	3	169	7	cod	1	0	0	0	0	1	0	0	0	0	0	0	0	0	0
22/08/2015	8:46:00	59580	1 day, 5:00:00	3	169	7	sculpin	1	0	0	0	0	1	0	0	0	0	0	0	0	0	0
22/08/2015	8:46:00	59580	1 day, 5:00:00	3	169	7	cod	0	0	0	0	0	0	0	0	0	0	0	0	0	0	0
22/08/2015	8:47:00	59640	1 day, 6:00:00	3	169	7	cod	0	0	0	0	0	0	0	0	0	0	0	0	0	0	0
22/08/2015	8:48:00	59700	1:00:00	3	170	6	cod	0	0	0	0	0	0	0	0	0	0	0	0	0	0	0
22/08/2015	8:49:00	59760	2:00:00	3	170	6	cod	0	0	0	0	0	0	0	0	0	0	0	0	0	0	0
22/08/2015	8:50:00	59820	3:00:00	3	170	6	cod	0	0	0	0	0	0	0	0	0	0	0	0	0	0	0
22/08/2015	8:51:00	59880	4:00:00	3	170	6	cod	0	0	0	0	0	0	0	0	0	0	0	0	0	0	0
22/08/2015	8:52:00	59940	5:00:00	3	170	6	cod	0	0	0	0	0	0	0	0	0	0	0	0	0	0	0
22/08/2015	8:53:00	60000	6:00:00	3	170	6	cod	0	0	0	0	0	0	0	0	0	0	0	0	0	0	0
22/08/2015	8:54:00	60060	7:00:00	3	170	6	sculpin	1	0	0	0	0	0	0	1	0	0	0	0	0	0	0
22/08/2015	8:54:00	60060	7:00:00	3	170	6	cod	0	0	0	0	0	0	0	0	0	0	0	0	0	0	0
22/08/2015	8:55:00	60120	8:00:00	3	170	6	cod	0	0	0	0	0	0	0	0	0	0	0	0	0	0	0
22/08/2015	8:56:00	60180	9:00:00	3	170	6	cod	1	0	0	0	0	0	0	1	0	0	0	0	0	0	0
22/08/2015	8:57:00	60240	10:00:00	3	170	6	cod	0	0	0	0	0	0	0	0	0	0	0	0	0	0	0
22/08/2015	8:58:00	60300	11:00:00	3	170	6	cod	1	0	1	0	0	0	0	0	0	0	0	0	0	0	0
22/08/2015	8:59:00	60360	12:00:00	3	170	6	cod	2	0	0	0	0	2	0	0	0	0	0	0	0	0	0
22/08/2015	9:00:00	60420	13:00:00	3	170	6	sculpin	1	0	1	0	0	0	0	0	0	0	0	0	0	0	0
22/08/2015	9:00:00	60420	13:00:00	3	170	6	cod	1	0	1	0	0	0	0	0	0	0	0	0	0	0	0
22/08/2015	9:01:00	60480	14:00:00	3	170	6	cod	2	0	0	0	0	2	0	0	0	0	0	0	0	0	0
22/08/2015	9:02:00	60540	15:00:00	3	170	6	cod	0	0	0	0	0	0	0	0	0	0	0	0	0	0	0
22/08/2015	9:03:00	60600	16:00:00	3	170	6	cod	1	0	0	0	1	0	0	0	0	0	0	0	0	0	0
22/08/2015	9:04:00	60660	17:00:00	3	170	6	cod	4	0	1	0	1	2	0	0	0	0	0	0	0	0	0
22/08/2015	9:05:00	60720	18:00:00	3	170	5	cod	3	0	1	0	1	1	0	0	0	0	0	0	0	0	0
22/08/2015	9:06:00	60780	19:00:00	3	170	5	cod	0	0	0	0	0	0	0	0	0	0	0	0	0	0	0
22/08/2015	9:07:00	60840	20:00:00	3	170	5	cod	0	0	0	0	0	0	0	0	0	0	0	0	0	0	0
22/08/2015	9:08:00	60900	21:00:00	3	170	5	cod	0	0	0	0	0	0	0	0	0	0	0	0	0	0	0
22/08/2015	9:09:00	60960	22:00:00	3	170	5	cod	0	0	0	0	0	0	0	0	0	0	0	0	0	0	0
22/08/2015	9:10:00	61020	23:00:00	3	170	5	cod	0	0	0	0	0	0	0	0	0	0	0	0	0	0	0
22/08/2015	9:11:00	61080	1 day, 0:00:00	3	170	5	cod	0	0	0	0	0	0	0	0	0	0	0	0	0	0	0
22/08/2015	9:12:00	61140	1 day, 1:00:00	3	170	5	cod	0	0	0	0	0	0	0	0	0	0	0	0	0	0	0
22/08/2015	9:13:00	61200	1 day, 2:00:00	3	170	5	cod	1	0	0	1	0	0	0	0	0	0	0	0	0	0	0
22/08/2015	9:14:00	61260	1 day, 3:00:00	3	170	5	cod	0	0	0	0	0	0	0	0	0	0	0	0	0	0	0
22/08/2015	9:15:00	61320	1 day, 4:00:00	3	170	5	cod	0	0	0	0	0	0	0	0	0	0	0	0	0	0	0
22/08/2015	9:16:00	61380	1 day, 5:00:00	3	170	5	cod	0	0	0	0	0	0	0	0	0	0	0	0	0	0	0
22/08/2015	9:17:00	61440	1 day, 6:00:00	3	170	5	cod	0	0	0	0	0	0	0	0	0	0	0	0	0	0	0
22/08/2015	9:18:00	61500	1:00:00	3	171	6	cod	0	0	0	0	0	0	0	0	0	0	0	0	0	0	0
22/08/2015	9:19:00	61560	2:00:00	3	171	6	cod	0	0	0	0	0	0	0	0	0	0	0	0	0	0	0
22/08/2015	9:20:00	61620	3:00:00	3	171	6	cod	0	0	0	0	0	0	0	0	0	0	0	0	0	0	0
22/08/2015	9:21:00	61680	4:00:00	3	171	6	cod	0	0	0	0	0	0	0	0	0	0	0	0	0	0	0
22/08/2015	9:22:00	61740	5:00:00	3	171	6	cod	0	0	0	0	0	0	0	0	0	0	0	0	0	0	0
22/08/2015	9:23:00	61800	6:00:00	3	171	6	cod	0	0	0	0	0	0	0	0	0	0	0	0	0	0	0
22/08/2015	9:24:00	61860	7:00:00	3	171	6	sculpin	1	0	0	0	0	0	0	1	0	0	0	0	0	0	0
22/08/2015	9:24:00	61860	7:00:00	3	171	6	cod	0	0	0	0	0	0	0	0	0	0	0	0	0	0	0
22/08/2015	9:25:00	61920	8:00:00	3	171	6	cod	0	0	0	0	0	0	0	0	0	0	0	0	0	0	0
22/08/2015	9:26:00	61980	9:00:00	3	171	6	cod	1	0	0	0	0	0	0	1	0	0	0	0	0	0	0
22/08/2015	9:27:00	62040	10:00:00	3	171	6	cod	1	0	0	0	0	0	0	0	1	0	0	0	0	0	0
22/08/2015	9:28:00	62100	11:00:00	3	171	6	cod	1	0	1	0	0	0	0	0	0	0	0	0	0	0	0
22/08/2015	9:29:00	62160	12:00:00	3	171	6	cod	2	0	0	0	0	2	0	0	0	1	0	1	1	0	0
22/08/2015	9:30:00	62220	13:00:00	3	171	6	sculpin	1	0	0	1	0	0	0	0	0	0	0	0	0	0	0
22/08/2015	9:30:00	62220	13:00:00	3	171	6	cod	1	0	1	0	0	0	0	0	0	0	0	0	0	0	0
22/08/2015	9:31:00	62280	14:00:00	3	171	6	cod	2	0	0	0	0	2	0	0	0	0	0	0	0	0	0
22/08/2015	9:32:00	62340	15:00:00	3	171	6	cod	0	0	0	0	0	0	0	0	0	0	0	0	0	0	0
22/08/2015	9:33:00	62400	16:00:00	3	171	6	cod	1	0	0	0	1	0	0	0	0	0	0	0	0	0	0
22/08/2015	9:34:00	62460	17:00:00	3	171	6	cod	4	0	1	0	1	2	0	0	0	0	0	0	0	0	0
22/08/2015	9:35:00	62520	18:00:00	3	171	6	cod	3	0	1	0	1	1	0	0	0	0	0	0	0	0	0
22/08/2015	9:36:00	62580	19:00:00	3	171	6	cod	0	0	0	0	0	0	0	0	0	0	0	0	0	0	0
22/08/2015	9:37:00	62640	20:00:00	3	171	6	cod	0	0	0	0	0	0	0	0	0	0	0	0	0	0	0
22/08/2015	9:38:00	62700	21:00:00	3	171	6	cod	0	0	0	0	0	0	0	0	0	0	0	0	0	0	0
22/08/2015	9:39:00	62760	22:00:00	3	171	6	cod	0	0	0	0	0	0	0	0	0	0	0	0	0	0	0
22/08/2015	9:40:00	62820	23:00:00	3	171	6	cod	0	0	0	0	0	0	0	0	0	0	0	0	0	0	0
22/08/2015	9:41:00	62880	1 day, 0:00:00	3	171	6	cod	0	0	0	0	0	0	0	0	0	0	0	0	0	0	0
22/08/2015	9:42:00	62940	1 day, 1:00:00	3	171	5	cod	0	0	0	0	0	0	0	0	0	0	0	0	0	0	0
22/08/2015	9:43:00	63000	1 day, 2:00:00	3	171	5	cod	1	0	0	1	0	0	0	0	0	0	0	0	0	0	0
22/08/2015	9:44:00	63060	1 day, 3:00:00	3	171	5	cod	0	0	0	0	0	0	0	0	0	0	0	0	0	0	0
22/08/2015	9:45:00	63120	1 day, 4:00:00	3	171	5	cod	0	0	0	0	0	0	0	0	0	0	0	0	0	0	0
22/08/2015	9:46:00	63180	1 day, 5:00:00	3	171	5	cod	0	0	0	0	0	0	0	0	0	0	0	0	0	0	0
22/08/2015	9:47:00	63240	1 day, 6:00:00	3	171	5	cod	0	0	0	0	0	0	0	0	0	0	0	0	0	0	0
22/08/2015	9:48:00	63300	1:00:00	3	172	5	cod	0	0	0	0	0	0	0	0	0	0	0	0	0	0	0
22/08/2015	9:49:00	63360	2:00:00	3	172	5	cod	0	0	0	0	0	0	0	0	0	0	0	0	0	0	0
22/08/2015	9:50:00	63420	3:00:00	3	172	5	cod	0	0	0	0	0	0	0	0	0	0	0	0	0	0	0
22/08/2015	9:51:00	63480	4:00:00	3	172	5	cod	0	0	0	0	0	0	0	0	0	0	0	0	0	0	0
22/08/2015	9:52:00	63540	5:00:00	3	172	5	cod	0	0	0	0	0	0	0	0	0	0	0	0	0	0	0
22/08/2015	9:53:00	63600	6:00:00	3	172	5	cod	0	0	0	0	0	0	0	0	0	0	0	0	0	0	0
22/08/2015	9:54:00	63660	7:00:00	3	172	5	cod	0	0	0	0	0	0	0	0	0	0	0	0	0	0	0
22/08/2015	9:55:00	63720	8:00:00	3	172	5	cod	0	0	0	0	0	0	0	0	0	0	0	0	0	0	0
22/08/2015	9:56:00	63780	9:00:00	3	172	4	cod	0	0	0	0	0	0	0	0	0	0	0	0	0	0	0
22/08/2015	9:57:00	63840	10:00:00	3	172	4	cod	1	0	0	0	0	0	0	1	0	0	0	0	0	0	0
22/08/2015	9:58:00	63900	11:00:00	3	172	4	cod	1	1	0	0	0	0	0	0	0	0	0	0	0	0	0
22/08/2015	9:59:00	63960	12:00:00	3	172	4	cod	1	0	0	1	0	0	0	0	0	0	0	0	0	0	0
22/08/2015	10:00:00	64020	13:00:00	3	172	4	cod	2	0	0	0	0	1	1	0	0	0	0	0	0	0	0
22/08/2015	10:01:00	64080	14:00:00	3	172	4	cod	0	0	0	0	0	0	0	0	0	0	0	0	0	0	0
22/08/2015	10:02:00	64140	15:00:00	3	172	4	cod	0	0	0	0	0	0	0	0	0	0	0	0	0	0	0
22/08/2015	10:03:00	64200	16:00:00	3	172	4	cod	0	0	0	0	0	0	0	0	0	0	0	0	0	0	0
22/08/2015	10:04:00	64260	17:00:00	3	172	4	cod	0	0	0	0	0	0	0	0	0	0	0	0	0	0	0
22/08/2015	10:05:00	64320	18:00:00	3	172	4	cod	0	0	0	0	0	0	0	0	0	0	0	0	0	0	0
22/08/2015	10:06:00	64380	19:00:00	3	172	4	cod	0	0	0	0	0	0	0	0	0	0	0	0	0	0	0
22/08/2015	10:07:00	64440	20:00:00	3	172	4	cod	0	0	0	0	0	0	0	0	0	0	0	0	0	0	0
22/08/2015	10:08:00	64500	21:00:00	3	172	4	cod	1	0	1	0	0	0	0	0	0	0	0	0	0	0	0
22/08/2015	10:09:00	64560	22:00:00	3	172	4	cod	0	0	0	0	0	0	0	0	0	0	0	0	0	0	0
22/08/2015	10:10:00	64620	23:00:00	3	172	3	cod	0	0	0	0	0	0	0	0	0	0	0	0	0	0	0
22/08/2015	10:11:00	64680	1 day, 0:00:00	3	172	3	sculpin	2	0	1	1	0	0	0	0	0	0	0	0	0	0	0
22/08/2015	10:11:00	64680	1 day, 0:00:00	3	172	3	cod	1	0	0	0	1	0	0	0	0	0	0	0	0	0	0
22/08/2015	10:12:00	64740	1 day, 1:00:00	3	172	3	cod	1	0	1	0	0	0	0	0	0	0	0	0	0	0	0
22/08/2015	10:13:00	64800	1 day, 2:00:00	3	172	3	cod	4	4	0	0	0	0	0	0	0	0	0	0	0	0	0
22/08/2015	10:14:00	64860	1 day, 3:00:00	3	172	3	cod	1	1	0	0	0	0	0	0	0	0	0	0	0	0	0
22/08/2015	10:15:00	64920	1 day, 4:00:00	3	172	3	cod	3	1	0	0	2	0	0	0	0	0	0	0	0	0	0
22/08/2015	10:16:00	64980	1 day, 5:00:00	3	172	3	cod	0	0	0	0	0	0	0	0	0	0	0	0	0	0	0
22/08/2015	10:17:00	65040	1 day, 6:00:00	3	172	3	cod	0	0	0	0	0	0	0	0	0	0	0	0	0	0	0
22/08/2015	10:18:00	65100	1:00:00	3	173	4	cod	1	0	1	0	0	0	0	0	0	1	0	1	0	1	0
22/08/2015	10:19:00	65160	2:00:00	3	173	4	cod	0	0	0	0	0	0	0	0	0	0	0	0	0	0	0
22/08/2015	10:20:00	65220	3:00:00	3	173	4	cod	0	0	0	0	0	0	0	0	0	0	0	0	0	0	0
22/08/2015	10:21:00	65280	4:00:00	3	173	4	cod	0	0	0	0	0	0	0	0	0	0	0	0	0	0	0
22/08/2015	10:22:00	65340	5:00:00	3	173	3	cod	0	0	0	0	0	0	0	0	0	0	0	0	0	0	0
22/08/2015	10:23:00	65400	6:00:00	3	173	3	cod	2	0	2	0	0	0	0	0	0	0	0	0	0	0	0
22/08/2015	10:24:00	65460	7:00:00	3	173	3	cod	3	0	3	0	0	0	0	0	0	0	0	0	0	0	0
22/08/2015	10:25:00	65520	8:00:00	3	173	3	cod	0	0	0	0	0	0	0	0	0	0	0	0	0	0	0
22/08/2015	10:26:00	65580	9:00:00	3	173	3	cod	1	1	0	0	0	0	0	0	0	0	0	0	0	0	0
22/08/2015	10:27:00	65640	10:00:00	3	173	3	cod	0	0	0	0	0	0	0	0	0	0	0	0	0	0	0
22/08/2015	10:28:00	65700	11:00:00	3	173	3	cod	0	0	0	0	0	0	0	0	0	0	0	0	0	0	0
22/08/2015	10:29:00	65760	12:00:00	3	173	3	cod	0	0	0	0	0	0	0	0	0	0	0	0	0	0	0
22/08/2015	10:30:00	65820	13:00:00	3	173	3	cod	0	0	0	0	0	0	0	0	0	0	0	0	0	0	0
22/08/2015	10:31:00	65880	14:00:00	3	173	3	cod	0	0	0	0	0	0	0	0	0	0	0	0	0	0	0
22/08/2015	10:32:00	65940	15:00:00	3	173	3	cod	0	0	0	0	0	0	0	0	0	0	0	0	0	0	0
22/08/2015	10:33:00	66000	16:00:00	3	173	3	cod	0	0	0	0	0	0	0	0	0	0	0	0	0	0	0
22/08/2015	10:34:00	66060	17:00:00	3	173	3	cod	0	0	0	0	0	0	0	0	0	0	0	0	0	0	0
22/08/2015	10:35:00	66120	18:00:00	3	173	3	cod	0	0	0	0	0	0	0	0	0	0	0	0	0	0	0
22/08/2015	10:36:00	66180	19:00:00	3	173	3	cod	0	0	0	0	0	0	0	0	0	0	0	0	0	0	0
22/08/2015	10:37:00	66240	20:00:00	3	173	3	cod	0	0	0	0	0	0	0	0	0	0	0	0	0	0	0
22/08/2015	10:38:00	66300	21:00:00	3	173	3	cod	0	0	0	0	0	0	0	0	0	0	0	0	0	0	0
22/08/2015	10:39:00	66360	22:00:00	3	173	3	cod	0	0	0	0	0	0	0	0	0	0	0	0	0	0	0
22/08/2015	10:40:00	66420	23:00:00	3	173	3	cod	0	0	0	0	0	0	0	0	0	0	0	0	0	0	0
22/08/2015	10:41:00	66480	1 day, 0:00:00	3	173	3	cod	0	0	0	0	0	0	0	0	0	0	0	0	0	0	0
22/08/2015	10:42:00	66540	1 day, 1:00:00	3	173	3	cod	0	0	0	0	0	0	0	0	0	0	0	0	0	0	0
22/08/2015	10:43:00	66600	1 day, 2:00:00	3	173	3	cod	0	0	0	0	0	0	0	0	0	0	0	0	0	0	0
22/08/2015	10:44:00	66660	1 day, 3:00:00	3	173	3	cod	0	0	0	0	0	0	0	0	0	0	0	0	0	0	0
22/08/2015	10:45:00	66720	1 day, 4:00:00	3	173	3	cod	0	0	0	0	0	0	0	0	0	0	0	0	0	0	0
22/08/2015	10:46:00	66780	1 day, 5:00:00	3	173	3	cod	0	0	0	0	0	0	0	0	0	0	0	0	0	0	0
22/08/2015	10:47:00	66840	1 day, 6:00:00	3	173	3	cod	0	0	0	0	0	0	0	0	0	0	0	0	0	0	0
22/08/2015	10:48:00	66900	1:00:00	3	174	3	cod	0	0	0	0	0	0	0	0	0	0	0	0	0	0	0
22/08/2015	10:49:00	66960	2:00:00	3	174	3	cod	0	0	0	0	0	0	0	0	0	0	0	0	0	0	0
22/08/2015	10:50:00	67020	3:00:00	3	174	3	cod	2	0	2	0	0	0	0	0	0	0	0	0	0	0	0
22/08/2015	10:51:00	67080	4:00:00	3	174	3	cod	0	0	0	0	0	0	0	0	0	0	0	0	0	0	0
22/08/2015	10:52:00	67140	5:00:00	3	174	2	cod	3	1	2	0	0	0	0	0	0	0	0	0	0	0	0
22/08/2015	10:53:00	67200	6:00:00	3	174	2	cod	0	0	0	0	0	0	0	0	0	1	0	1	0	1	0
22/08/2015	10:54:00	67260	7:00:00	3	174	2	cod	3	0	2	1	0	0	0	0	0	0	0	0	0	0	0
22/08/2015	10:55:00	67320	8:00:00	3	174	2	cod	1	1	0	0	0	0	0	0	0	0	0	0	0	0	0
22/08/2015	10:56:00	67380	9:00:00	3	174	2	cod	1	1	0	0	0	0	0	0	0	0	0	0	0	0	0
22/08/2015	10:57:00	67440	10:00:00	3	174	2	cod	2	0	1	0	0	0	0	1	0	0	0	0	0	0	0
22/08/2015	10:58:00	67500	11:00:00	3	174	2	cod	1	0	1	0	0	0	0	0	0	0	0	0	0	0	0
22/08/2015	10:59:00	67560	12:00:00	3	174	2	cod	0	0	0	0	0	0	0	0	0	0	0	0	0	0	0
22/08/2015	11:00:00	67620	13:00:00	3	174	2	cod	4	0	3	0	1	0	0	0	0	1	0	1	0	1	0
22/08/2015	11:01:00	67680	14:00:00	3	174	2	cod	0	0	0	0	0	0	0	0	0	1	0	1	0	1	0	13:31 - Jellyfish blocks view of left entrance
22/08/2015	11:02:00	67740	15:00:00	3	174	3	tc	1	0	1	0	0	0	0	0	0	0	0	0	0	0	0
22/08/2015	11:02:00	67740	15:00:00	3	174	3	cod	1	0	1	0	0	0	0	0	0	0	0	0	0	0	0
22/08/2015	11:03:00	67800	16:00:00	3	174	3	cod	2	0	0	1	0	0	1	0	0	2	0	2	0	2	0
22/08/2015	11:04:00	67860	17:00:00	3	174	3	cod	4	0	2	1	0	1	0	0	0	0	0	0	0	0	0
22/08/2015	11:05:00	67920	18:00:00	3	174	3	sculpin	1	0	0	1	0	0	0	0	0	1	0	1	0	0	0
22/08/2015	11:05:00	67920	18:00:00	3	174	3	cod	2	0	1	0	1	0	0	0	0	0	0	0	0	0	0
22/08/2015	11:06:00	67980	19:00:00	3	174	3	sculpin	0	0	0	0	0	0	0	0	0	0	0	0	0	1	0
22/08/2015	11:06:00	67980	19:00:00	3	174	3	cod	0	0	0	0	0	0	0	0	0	0	0	0	0	0	0
22/08/2015	11:07:00	68040	20:00:00	3	174	3	cod	1	0	0	0	1	0	0	0	0	0	0	0	0	0	0
22/08/2015	11:08:00	68100	21:00:00	3	174	3	cod	0	0	0	0	0	0	0	0	0	0	0	0	0	0	0
22/08/2015	11:09:00	68160	22:00:00	3	174	3	cod	2	0	1	0	1	0	0	0	0	0	0	0	0	0	0
22/08/2015	11:10:00	68220	23:00:00	3	174	3	cod	2	0	0	2	0	0	0	0	0	0	0	0	0	0	0
22/08/2015	11:11:00	68280	1 day, 0:00:00	3	174	3	cod	1	0	1	0	0	0	0	0	0	0	0	0	0	0	0
22/08/2015	11:12:00	68340	1 day, 1:00:00	3	174	3	cod	1	0	0	0	1	0	0	0	0	0	0	0	0	0	0
22/08/2015	11:13:00	68400	1 day, 2:00:00	3	174	3	cod	0	0	0	0	0	0	0	0	0	0	0	0	0	0	0
22/08/2015	11:14:00	68460	1 day, 3:00:00	3	174	3	cod	0	0	0	0	0	0	0	0	0	0	0	0	0	0	0
22/08/2015	11:15:00	68520	1 day, 4:00:00	3	174	3	cod	0	0	0	0	0	0	0	0	0	0	0	0	0	0	0
22/08/2015	11:16:00	68580	1 day, 5:00:00	3	174	3	cod	1	0	1	0	0	0	0	0	0	0	0	0	0	0	0
22/08/2015	11:17:00	68640	1 day, 6:00:00	3	174	3	cod	0	0	0	0	0	0	0	0	0	0	0	0	0	0	0
22/08/2015	11:18:00	68700	1:00:00	3	175	3	cod	2	0	1	1	0	0	0	0	0	0	0	0	0	0	0	Video 175 is good example of fish entering downstream entrance
22/08/2015	11:19:00	68760	2:00:00	3	175	3	cod	0	0	0	0	0	0	0	0	0	0	0	0	0	0	0
22/08/2015	11:20:00	68820	3:00:00	3	175	3	cod	3	0	0	3	0	0	0	0	0	0	0	0	0	0	0
22/08/2015	11:21:00	68880	4:00:00	3	175	3	cod	2	0	1	0	1	0	0	0	0	0	0	0	0	0	0
22/08/2015	11:22:00	68940	5:00:00	3	175	3	cod	5	0	2	2	1	0	0	0	0	0	0	0	0	0	0
22/08/2015	11:23:00	69000	6:00:00	3	175	3	cod	3	0	1	2	0	0	0	0	0	0	0	0	0	0	0
22/08/2015	11:24:00	69060	7:00:00	3	175	3	cod	5	0	3	1	1	0	0	0	0	0	0	0	0	0	0
22/08/2015	11:25:00	69120	8:00:00	3	175	3	cod	2	0	1	1	0	0	0	0	0	0	0	0	0	0	0
22/08/2015	11:26:00	69180	9:00:00	3	175	3	cod	0	0	0	0	0	0	0	0	0	0	0	0	0	0	0
22/08/2015	11:27:00	69240	10:00:00	3	175	3	cod	2	0	1	1	0	0	0	0	0	0	0	0	0	0	0
22/08/2015	11:28:00	69300	11:00:00	3	175	3	cod	1	0	1	0	0	0	0	0	0	0	0	0	0	0	0
22/08/2015	11:29:00	69360	12:00:00	3	175	3	cod	6	0	5	1	0	0	0	0	0	0	0	0	0	0	0
22/08/2015	11:30:00	69420	13:00:00	3	175	3	cod	6	0	4	2	0	0	0	0	0	3	0	3	0	2	0
22/08/2015	11:31:00	69480	14:00:00	3	175	3	cod	1	0	0	0	0	1	0	0	0	2	0	2	0	3	0
22/08/2015	11:32:00	69540	15:00:00	3	175	3	cod	0	0	0	0	0	0	0	0	0	5	0	5	0	5	0	Most attempted entrances during a short time span
22/08/2015	11:33:00	69600	16:00:00	3	175	3	cod	3	0	2	0	1	0	0	0	0	2	0	2	0	2	0	Looks like crab is defending the entrance/preventing the cod
22/08/2015	11:34:00	69660	17:00:00	3	175	3	cod	2	0	1	1	0	0	0	0	0	1	0	1	0	0	0
22/08/2015	11:35:00	69720	18:00:00	3	175	3	cod	6	0	3	2	1	0	0	0	0	2	0	2	0	3	0
22/08/2015	11:36:00	69780	19:00:00	3	175	3	cod	3	0	1	1	0	0	0	1	0	0	0	0	0	0	0
22/08/2015	11:37:00	69840	20:00:00	3	175	3	sculpin	1	0	0	0	0	1	0	0	0	0	0	0	0	0	0
22/08/2015	11:37:00	69840	20:00:00	3	175	3	cod	3	0	1	2	0	0	0	0	0	1	0	1	0	1	0
22/08/2015	11:38:00	69900	21:00:00	3	175	3	cod	6	1	3	1	0	0	0	0	1	0	0	0	0	0	0
22/08/2015	11:39:00	69960	22:00:00	3	175	3	cod	3	1	0	1	0	0	1	0	0	1	0	1	0	1	0
22/08/2015	11:40:00	70020	23:00:00	3	175	3	cod	5	0	1	3	0	1	0	0	0	0	0	0	0	0	0
22/08/2015	11:41:00	70080	1 day, 0:00:00	3	175	3	cod	4	0	2	2	0	0	0	0	0	0	0	0	0	0	0
22/08/2015	11:42:00	70140	1 day, 1:00:00	3	175	3	cod	1	0	0	0	1	0	0	0	0	2	0	2	0	1	0
22/08/2015	11:43:00	70200	1 day, 2:00:00	3	175	3	cod	7	1	3	1	2	0	0	0	0	0	0	0	1	0	0
22/08/2015	11:44:00	70260	1 day, 3:00:00	3	175	3	cod	5	1	1	0	2	1	0	0	0	1	0	1	0	0	0
22/08/2015	11:45:00	70320	1 day, 4:00:00	3	175	3	cod	3	0	0	0	0	2	1	0	0	1	0	1	0	2	1
22/08/2015	11:46:00	70380	1 day, 5:00:00	3	175	3	cod	5	1	2	2	0	0	0	0	0	0	0	0	0	0	0
22/08/2015	11:47:00	70440	1 day, 6:00:00	3	175	3	cod	4	0	2	2	0	0	0	0	0	2	0	2	1	1	0
22/08/2015	11:48:00	70500	1:00:00	3	176	3	cod	2	0	1	1	0	0	0	0	0	0	0	0	0	0	0
22/08/2015	11:49:00	70560	2:00:00	3	176	3	cod	3	0	1	1	1	0	0	0	0	0	0	0	0	0	0
22/08/2015	11:50:00	70620	3:00:00	3	176	3	cod	2	0	0	2	0	0	0	0	0	0	0	0	0	0	0
22/08/2015	11:51:00	70680	4:00:00	3	176	3	cod	7	0	4	3	0	0	0	0	0	0	0	0	0	0	0
22/08/2015	11:52:00	70740	5:00:00	3	176	3	cod	2	0	1	1	0	0	0	0	0	0	0	0	0	0	0
22/08/2015	11:53:00	70800	6:00:00	3	176	3	cod	1	0	0	1	0	0	0	0	0	0	0	0	0	0	0
22/08/2015	11:54:00	70860	7:00:00	3	176	3	cod	0	0	0	0	0	0	0	0	0	0	0	0	0	0	0
22/08/2015	11:55:00	70920	8:00:00	3	176	3	cod	1	0	1	0	0	0	0	0	0	0	0	0	0	0	0
22/08/2015	11:56:00	70980	9:00:00	3	176	3	cod	2	0	2	0	0	0	0	0	0	0	0	0	0	0	0
22/08/2015	11:57:00	71040	10:00:00	3	176	3	cod	6	0	2	3	1	0	0	0	0	0	0	0	0	0	0
22/08/2015	11:58:00	71100	11:00:00	3	176	3	cod	8	1	7	0	0	0	0	0	0	0	0	0	0	0	0
22/08/2015	11:59:00	71160	12:00:00	3	176	3	cod	2	0	0	2	0	0	0	0	0	0	0	0	0	0	0
22/08/2015	12:00:00	71220	13:00:00	3	176	3	cod	6	1	3	2	0	0	0	0	0	0	0	0	0	0	0
22/08/2015	12:01:00	71280	14:00:00	3	176	3	cod	6	0	5	1	0	0	0	0	0	0	0	0	0	0	0
22/08/2015	12:02:00	71340	15:00:00	3	176	3	cod	4	0	2	1	0	1	0	0	0	1	0	1	0	1	0
22/08/2015	12:03:00	71400	16:00:00	3	176	3	cod	3	0	2	1	0	0	0	0	0	0	0	0	0	0	0
22/08/2015	12:04:00	71460	17:00:00	3	176	3	cod	2	0	1	0	1	0	0	0	0	0	0	0	0	0	0
22/08/2015	12:05:00	71520	18:00:00	3	176	3	cod	5	0	4	1	0	0	0	0	0	0	0	0	0	0	0
22/08/2015	12:06:00	71580	19:00:00	3	176	3	cod	1	1	0	0	0	0	0	0	0	1	0	1	1	0	0
22/08/2015	12:07:00	71640	20:00:00	3	176	3	cod	2	0	0	0	1	0	1	0	0	0	0	0	0	0	0
22/08/2015	12:08:00	71700	21:00:00	3	176	3	cod	4	1	1	0	1	0	1	0	0	0	0	0	0	0	0
22/08/2015	12:09:00	71760	22:00:00	3	176	3	sculpin	1	0	1	0	0	0	0	0	0	0	0	0	0	0	0
22/08/2015	12:09:00	71760	22:00:00	3	176	3	cod	6	1	4	0	1	0	0	0	0	0	0	0	0	0	0
22/08/2015	12:10:00	71820	23:00:00	3	176	3	cod	3	0	1	0	1	0	0	0	1	0	0	0	0	0	0
22/08/2015	12:11:00	71880	1 day, 0:00:00	3	176	3	cod	3	0	3	0	0	0	0	0	0	0	0	0	0	0	0
22/08/2015	12:12:00	71940	1 day, 1:00:00	3	176	3	cod	2	0	1	0	1	0	0	0	0	0	0	0	0	0	0
22/08/2015	12:13:00	72000	1 day, 2:00:00	3	176	3	cod	2	0	2	0	0	0	0	0	0	0	0	0	0	0	0
22/08/2015	12:14:00	72060	1 day, 3:00:00	3	176	3	cod	1	0	1	0	0	0	0	0	0	0	0	0	0	0	0
22/08/2015	12:15:00	72120	1 day, 4:00:00	3	176	3	cod	3	0	2	1	0	0	0	0	0	0	0	0	0	0	0
22/08/2015	12:16:00	72180	1 day, 5:00:00	3	176	3	cod	4	0	3	1	0	0	0	0	0	2	0	2	0	2	0
22/08/2015	12:17:00	72240	1 day, 6:00:00	3	176	3	cod	0	0	0	0	0	0	0	0	0	1	0	1	0	1	0
22/08/2015	12:18:00	72300	1:00:00	3	177	3	cod	1	0	1	0	0	0	0	0	0	0	0	0	0	0	0
22/08/2015	12:19:00	72360	2:00:00	3	177	3	cod	0	0	0	0	0	0	0	0	0	0	0	0	0	0	0
22/08/2015	12:20:00	72420	3:00:00	3	177	3	cod	0	0	0	0	0	0	0	0	0	0	0	0	0	0	0
22/08/2015	12:21:00	72480	4:00:00	3	177	3	sculpin	1	0	0	0	0	1	0	0	0	0	0	0	0	0	0
22/08/2015	12:21:00	72480	4:00:00	3	177	3	cod	2	0	1	1	0	0	0	0	0	0	0	0	0	0	0
22/08/2015	12:22:00	72540	5:00:00	3	177	3	cod	4	0	4	0	0	0	0	0	0	1	0	1	1	0	0
22/08/2015	12:23:00	72600	6:00:00	3	177	3	cod	7	1	3	2	1	0	0	0	0	0	0	0	0	0	0
22/08/2015	12:24:00	72660	7:00:00	3	177	3	cod	2	0	2	0	0	0	0	0	0	0	0	0	0	0	0
22/08/2015	12:25:00	72720	8:00:00	3	177	3	cod	1	1	0	0	0	0	0	0	0	0	0	0	0	0	0
22/08/2015	12:26:00	72780	9:00:00	3	177	3	cod	0	0	0	0	0	0	0	0	0	0	0	0	0	0	0
22/08/2015	12:27:00	72840	10:00:00	3	177	3	cod	2	0	2	0	0	0	0	0	0	0	0	0	0	0	0
22/08/2015	12:28:00	72900	11:00:00	3	177	2	cod	3	0	2	1	0	0	0	0	0	0	0	0	0	0	0
22/08/2015	12:29:00	72960	12:00:00	3	177	2	cod	3	1	1	1	0	0	0	0	0	0	0	0	0	0	0
22/08/2015	12:30:00	73020	13:00:00	3	177	2	cod	1	0	1	0	0	0	0	0	0	0	0	0	0	0	0
22/08/2015	12:31:00	73080	14:00:00	3	177	2	cod	6	3	3	0	0	0	0	0	0	0	0	0	0	0	0
22/08/2015	12:32:00	73140	15:00:00	3	177	2	cod	0	0	0	0	0	0	0	0	0	0	0	0	0	0	0
22/08/2015	12:33:00	73200	16:00:00	3	177	2	cod	0	0	0	0	0	0	0	0	0	0	0	0	0	0	0
22/08/2015	12:34:00	73260	17:00:00	3	177	2	cod	2	0	1	1	0	0	0	0	0	0	0	0	0	0	0
22/08/2015	12:35:00	73320	18:00:00	3	177	2	cod	1	0	0	1	0	0	0	0	0	1	0	1	0	1	0
22/08/2015	12:36:00	73380	19:00:00	3	177	3	cod	2	1	1	0	0	0	0	0	0	0	0	0	0	0	0
22/08/2015	12:37:00	73440	20:00:00	3	177	3	cod	4	1	2	1	0	0	0	0	0	0	0	0	0	0	0
22/08/2015	12:38:00	73500	21:00:00	3	177	3	cod	1	0	1	0	0	0	0	0	0	0	0	0	0	0	0
22/08/2015	12:39:00	73560	22:00:00	3	177	3	cod	3	0	3	0	0	0	0	0	0	0	0	0	0	0	0
22/08/2015	12:40:00	73620	23:00:00	3	177	3	cod	1	0	1	0	0	0	0	0	0	0	0	0	0	0	0
22/08/2015	12:41:00	73680	1 day, 0:00:00	3	177	3	cod	3	1	0	0	0	1	1	0	0	0	0	0	0	0	0
22/08/2015	12:42:00	73740	1 day, 1:00:00	3	177	3	cod	3	1	2	0	0	0	0	0	0	0	0	0	0	0	0
22/08/2015	12:43:00	73800	1 day, 2:00:00	3	177	3	cod	4	0	2	1	0	0	0	1	0	0	0	0	0	0	0
22/08/2015	12:44:00	73860	1 day, 3:00:00	3	177	3	cod	0	0	0	0	0	0	0	0	0	0	0	0	0	0	0
22/08/2015	12:45:00	73920	1 day, 4:00:00	3	177	3	cod	1	0	1	0	0	0	0	0	0	0	0	0	0	0	0
22/08/2015	12:46:00	73980	1 day, 5:00:00	3	177	3	cod	4	1	2	1	0	0	0	0	0	0	0	0	0	0	0
22/08/2015	12:47:00	74040	1 day, 6:00:00	3	177	3	cod	3	0	2	1	0	0	0	0	0	0	0	0	0	0	0
22/08/2015	12:48:00	74100	1:00:00	3	178	3	cod	3	1	1	1	0	0	0	0	0	0	0	0	0	0	0
22/08/2015	12:49:00	74160	2:00:00	3	178	3	cod	0	0	0	0	0	0	0	0	0	0	0	0	0	0	0
22/08/2015	12:50:00	74220	3:00:00	3	178	2	cod	2	0	1	0	1	0	0	0	0	0	0	0	0	0	0
22/08/2015	12:51:00	74280	4:00:00	3	178	2	cod	1	0	1	0	0	0	0	0	0	0	0	0	0	0	0
22/08/2015	12:52:00	74340	5:00:00	3	178	2	cod	2	0	1	1	0	0	0	0	0	0	0	0	0	0	0
22/08/2015	12:53:00	74400	6:00:00	3	178	2	cod	0	0	0	0	0	0	0	0	0	0	0	0	0	0	0
22/08/2015	12:54:00	74460	7:00:00	3	178	2	cod	2	1	0	0	1	0	0	0	0	0	0	0	0	0	0
22/08/2015	12:55:00	74520	8:00:00	3	178	2	cod	1	0	0	0	1	0	0	0	0	0	0	0	0	0	0
22/08/2015	12:56:00	74580	9:00:00	3	178	2	cod	2	0	2	0	0	0	0	0	0	0	0	0	0	0	0
22/08/2015	12:57:00	74640	10:00:00	3	178	2	cod	2	0	1	0	0	1	0	0	0	0	0	0	0	0	0
22/08/2015	12:58:00	74700	11:00:00	3	178	2	cod	2	0	2	0	0	0	0	0	0	0	0	0	0	0	0
22/08/2015	12:59:00	74760	12:00:00	3	178	2	cod	0	0	0	0	0	0	0	0	0	0	0	0	0	0	0
22/08/2015	13:00:00	74820	13:00:00	3	178	2	cod	4	2	2	0	0	0	0	0	0	0	0	0	0	0	0
22/08/2015	13:01:00	74880	14:00:00	3	178	2	cod	4	2	1	0	0	0	0	1	0	0	0	0	0	0	0
22/08/2015	13:02:00	74940	15:00:00	3	178	2	cod	2	0	1	0	0	0	0	1	0	0	0	0	0	0	0
22/08/2015	13:03:00	75000	16:00:00	3	178	2	cod	0	0	0	0	0	0	0	0	0	0	0	0	0	0	0
22/08/2015	13:04:00	75060	17:00:00	3	178	2	sculpin	1	0	0	0	0	0	0	1	0	0	0	0	0	0	0
22/08/2015	13:04:00	75060	17:00:00	3	178	2	cod	0	0	0	0	0	0	0	0	0	0	0	0	0	0	0
22/08/2015	13:05:00	75120	18:00:00	3	178	2	cod	3	3	0	0	0	0	0	0	0	0	0	0	0	0	0
22/08/2015	13:06:00	75180	19:00:00	3	178	2	cod	3	0	2	0	1	0	0	0	0	0	0	0	0	0	0
22/08/2015	13:07:00	75240	20:00:00	3	178	2	cod	2	0	2	0	0	0	0	0	0	0	0	0	0	0	0
22/08/2015	13:08:00	75300	21:00:00	3	178	2	cod	0	0	0	0	0	0	0	0	0	0	0	0	0	0	0
22/08/2015	13:09:00	75360	22:00:00	3	178	2	cod	0	0	0	0	0	0	0	0	0	0	0	0	0	0	0
22/08/2015	13:10:00	75420	23:00:00	3	178	2	cod	0	0	0	0	0	0	0	0	0	0	0	0	0	0	0
22/08/2015	13:11:00	75480	1 day, 0:00:00	3	178	2	cod	0	0	0	0	0	0	0	0	0	0	0	0	0	0	0
22/08/2015	13:12:00	75540	1 day, 1:00:00	3	178	2	cod	0	0	0	0	0	0	0	0	0	0	0	0	0	0	0
22/08/2015	13:13:00	75600	1 day, 2:00:00	3	178	2	cod	2	0	2	0	0	0	0	0	0	0	0	0	0	0	0
22/08/2015	13:14:00	75660	1 day, 3:00:00	3	178	2	cod	0	0	0	0	0	0	0	0	0	0	0	0	0	0	0	Hauled at: Video Time - 26:12 / Actual Time - 12:51PM / Calculated Time - 13:14PM
29/08/2015	12:39:30	0	0:00:00	7	349																		Start
29/08/2015	12:40:30	60	1:00:00	7	349		cod	11	1	0	1	1	2	2	4	0	0	0	0	0	0	0
29/08/2015	12:41:30	120	2:00:00	7	349		cod	7	0	0	0	2	2	1	2	0	0	0	0	0	0	0
29/08/2015	12:42:30	180	3:00:00	7	349		cod	5	0	0	4	1	0	0	0	0	0	0	0	0	0	0
29/08/2015	12:43:30	240	4:00:00	7	349		cod	5	0	1	2	1	1	0	0	0	0	0	0	0	0	0
29/08/2015	12:44:30	300	5:00:00	7	349		cod	8	0	2	4	2	0	0	0	0	0	0	0	0	0	0
29/08/2015	12:45:30	360	6:00:00	7	349		cod	5	1	2	0	2	0	0	0	0	0	0	0	0	0	0
29/08/2015	12:46:30	420	7:00:00	7	349		cod	8	0	1	1	3	0	1	0	2	1	1	0	1	0	0	Doesn’t touch metal triggers - goes thru
29/08/2015	12:47:30	480	8:00:00	7	349		cod	13	0	2	1	3	1	3	1	2	0	0	0	0	0	0
29/08/2015	12:48:30	540	9:00:00	7	349		cod	10	2	3	0	0	0	1	2	2	1	1	0	0	1	0
29/08/2015	12:49:30	600	10:00:00	7	349		cod	12	0	1	3	3	2	0	1	2	0	0	0	0	0	0
29/08/2015	12:50:30	660	11:00:00	7	349		cod	10	1	1	0	4	1	1	0	2	2	2	0	0	1	0
29/08/2015	12:51:30	720	12:00:00	7	349		cod	14	0	0	1	10	1	1	1	0	4	4	0	1	4	0
29/08/2015	12:52:30	780	13:00:00	7	349		cod	4	0	0	0	1	0	2	1	0	2	2	0	0	2	0
29/08/2015	12:53:30	840	14:00:00	7	349		cod	14	0	1	1	4	3	0	2	3	0	0	0	0	0	0
29/08/2015	12:54:30	900	15:00:00	7	349		cod	13	2	3	1	4	0	0	1	2	0	0	0	0	0	0
29/08/2015	12:55:30	960	16:00:00	7	349		cod	11	2	1	1	4	1	0	1	1	0	0	0	0	0	0
29/08/2015	12:56:30	1020	17:00:00	7	349		cod	25	6	3	5	4	0	0	3	4	0	0	0	0	0	0
29/08/2015	12:57:30	1080	18:00:00	7	349		cod	20	1	8	1	3	0	2	3	2	0	0	0	0	0	0
29/08/2015	12:58:30	1140	19:00:00	7	349		cod	30	2	7	5	8	2	3	2	1	0	0	0	0	0	0
29/08/2015	12:59:30	1200	20:00:00	7	349		cod	41	3	4	3	11	3	6	4	7	0	0	0	0	0	0
29/08/2015	13:00:30	1260	21:00:00	7	349		cod	30	5	3	3	6	2	5	2	4	0	0	0	0	0	0
29/08/2015	13:01:30	1320	22:00:00	7	349		cod	16	1	7	2	1	1	3	0	1	0	0	0	0	0	0
29/08/2015	13:02:30	1380	23:00:00	7	349		cod	18	3	1	0	3	3	3	4	1	0	0	0	0	0	0
29/08/2015	13:03:30	1440	1 day, 0:00:00	7	349		cod	15	0	1	0	7	2	3	1	1	0	0	0	0	0	0
29/08/2015	13:04:30	1500	1 day, 1:00:00	7	349		cod	15	1	0	0	8	0	3	2	1	0	0	0	0	0	0	3 fish enter pot - down head- cant see attempts - don’t touch metal triggers, go thru
29/08/2015	13:05:30	1560	1 day, 2:00:00	7	349		cod	30	0	1	3	13	1	7	3	2	0	0	0	0	0	0
29/08/2015	13:06:30	1620	1 day, 3:00:00	7	349		cod	10	0	0	1	5	0	3	0	1	0	0	0	0	0	0	27 Min Video
29/08/2015	13:07:30	1680	1:00:00	7	350	3	cod	17	2	1	3	8	1	2	0	0	0	0	0	0	0	0
29/08/2015	13:08:30	1740	2:00:00	7	350	3	cod	16	0	0	4	3	1	5	0	3	0	0	0	0	0	0
29/08/2015	13:09:30	1800	3:00:00	7	350	3	cod	14	1	1	2	3	2	2	1	2	0	0	0	0	0	0
29/08/2015	13:10:30	1860	4:00:00	7	350	3	cod	10	1	1	1	6	0	0	0	1	0	0	0	0	0	0
29/08/2015	13:11:30	1920	5:00:00	7	350	3	cod	8	1	0	2	2	0	2	1	0	0	0	0	0	0	0
29/08/2015	13:12:30	1980	6:00:00	7	350	3	cod	6	0	1	2	1	0	2	0	0	0	0	0	0	0	0
29/08/2015	13:13:30	2040	7:00:00	7	350	3	cod	9	0	2	1	2	1	1	1	1	3	3	0	0	3	0
29/08/2015	13:14:30	2100	8:00:00	7	350	3	cod	20	1	4	3	6	0	3	0	3	0	0	0	0	0	0
29/08/2015	13:15:30	2160	9:00:00	7	350	3	cod	4	0	0	2	1	0	0	0	1	1	1	0	0	0	0
29/08/2015	13:16:30	2220	10:00:00	7	350	3	cod	18	1	2	1	5	5	0	2	2	0	0	0	0	0	0
29/08/2015	13:17:30	2280	11:00:00	7	350	3	cod	24	6	1	0	6	4	3	1	3	0	0	0	0	0	0
29/08/2015	13:18:30	2340	12:00:00	7	350	3	cod	14	2	1	2	3	0	3	3	0	0	0	0	0	0	0
29/08/2015	13:19:30	2400	13:00:00	7	350	3	cod	18	2	3	1	3	0	1	2	6	0	0	0	0	0	0
29/08/2015	13:20:30	2460	14:00:00	7	350	3	cod	9	0	2	0	2	0	1	2	2	0	0	0	0	0	0
29/08/2015	13:21:30	2520	15:00:00	7	350	3	cod	20	3	2	1	4	4	2	1	3	0	0	0	0	0	0
29/08/2015	13:22:30	2580	16:00:00	7	350	3	cod	19	2	1	2	4	4	2	2	2	0	0	0	0	0	0
29/08/2015	13:23:30	2640	17:00:00	7	350	3	cod	24	2	3	0	7	3	4	3	2	0	0	0	0	0	0
29/08/2015	13:24:30	2700	18:00:00	7	350	3	cod	17	2	1	0	3	2	3	5	1	0	0	0	0	0	0
29/08/2015	13:25:30	2760	19:00:00	7	350	3	cod	12	1	0	2	2	0	5	0	2	0	0	0	0	0	0
29/08/2015	13:26:30	2820	20:00:00	7	350	3	cod	10	0	1	1	1	2	2	2	1	0	0	0	0	0	0
29/08/2015	13:27:30	2880	21:00:00	7	350	3	cod	15	2	1	1	4	0	5	1	1	0	0	0	0	0	0
29/08/2015	13:28:30	2940	22:00:00	7	350	3	cod	11	0	0	3	2	0	4	1	1	0	0	0	0	0	0
29/08/2015	13:29:30	3000	23:00:00	7	350	3	cod	10	2	0	0	0	2	4	1	1	0	0	0	0	0	0
29/08/2015	13:30:30	3060	1 day, 0:00:00	7	350	3	cod	14	2	2	1	1	1	1	2	4	0	0	0	0	0	0
29/08/2015	13:31:30	3120	1 day, 1:00:00	7	350	3	cod	18	2	0	1	2	3	5	4	1	0	0	0	0	0	0
29/08/2015	13:32:30	3180	1 day, 2:00:00	7	350	3	cod	19	0	3	4	2	2	4	4	0	0	0	0	0	0	0
29/08/2015	13:33:30	3240	1 day, 3:00:00	7	350	3	cod	5	0	1	0	2	1	1	0	0	0	0	0	0	0	0
29/08/2015	13:34:30	3300	1:00:00	7	351	3	cod	18	2	3	1	2	1	6	2	1	0	0	0	0	0	0
29/08/2015	13:35:30	3360	2:00:00	7	351	3	cod	16	2	1	2	3	3	2	1	2	0	0	0	0	0	0
29/08/2015	13:36:30	3420	3:00:00	7	351	3	cod	16	1	6	1	1	0	5	1	1	0	0	0	0	0	0
29/08/2015	13:37:30	3480	4:00:00	7	351	3	cod	12	1	0	2	5	0	3	0	1	0	0	0	0	0	0
29/08/2015	13:38:30	3540	5:00:00	7	351	3	cod	15	1	1	4	4	2	1	2	0	0	0	0	0	0	0
29/08/2015	13:39:30	3600	6:00:00	7	351	3	cod	19	0	4	3	3	2	4	1	2	0	0	0	0	0	0
29/08/2015	13:40:30	3660	7:00:00	7	351	3	cod	14	1	4	1	3	1	2	1	1	0	0	0	0	0	0
29/08/2015	13:41:30	3720	8:00:00	7	351	3	cod	17	1	0	1	1	1	5	6	2	0	0	0	0	0	0
29/08/2015	13:42:30	3780	9:00:00	7	351	3	cod	15	0	4	4	6	0	1	0	0	4	4	0	0	4	0
29/08/2015	13:43:30	3840	10:00:00	7	351	3	cod	12	2	1	2	0	0	4	2	1	0	0	0	0	0	0
29/08/2015	13:44:30	3900	11:00:00	7	351	3	cod	6	0	2	2	1	1	0	0	0	0	0	0	0	0	0
29/08/2015	13:45:30	3960	12:00:00	7	351	3	cod	9	2	3	1	1	0	2	0	0	0	0	0	0	0	0
29/08/2015	13:46:30	4020	13:00:00	7	351	3	cod	6	0	1	1	1	2	0	1	0	0	0	0	0	0	0
29/08/2015	13:47:30	4080	14:00:00	7	351	3	cod	6	0	3	0	0	0	2	0	1	0	0	0	0	0	0
29/08/2015	13:48:30	4140	15:00:00	7	351	3	cod	5	0	0	0	1	2	2	0	0	0	0	0	0	0	0
29/08/2015	13:49:30	4200	16:00:00	7	351	3	cod	5	0	1	0	0	0	0	3	1	0	0	0	0	0	0
29/08/2015	13:50:30	4260	17:00:00	7	351	3	cod	8	1	0	0	1	2	2	2	0	2	2	0	1	1	0
29/08/2015	13:51:30	4320	18:00:00	7	351	3	cod	13	1	1	2	2	1	0	2	4	0	0	0	0	0	0
29/08/2015	13:52:30	4380	19:00:00	7	351	3	cod	9	1	1	0	0	0	1	2	4	0	0	0	0	0	0
29/08/2015	13:53:30	4440	20:00:00	7	351	3	cod	11	0	0	0	0	0	2	2	7	0	0	0	0	0	0
29/08/2015	13:54:30	4500	21:00:00	7	351	3	cod	14	2	0	0	1	2	2	4	3	0	0	0	0	0	0
29/08/2015	13:55:30	4560	22:00:00	7	351	3	cod	12	0	0	1	3	2	3	2	1	0	0	0	0	0	0
29/08/2015	13:56:30	4620	23:00:00	7	351	4	cod	11	1	1	0	0	1	4	2	2	0	0	0	0	0	0
29/08/2015	13:57:30	4680	1 day, 0:00:00	7	351	4	cod	7	0	0	0	2	2	2	1	0	0	0	0	0	0	0
29/08/2015	13:58:30	4740	1 day, 1:00:00	7	351	4	cod	8	0	2	0	3	0	2	0	1	0	0	0	0	0	0
29/08/2015	13:59:30	4800	1 day, 2:00:00	7	351	4	cod	4	0	0	1	1	1	1	0	0	0	0	0	0	0	0
29/08/2015	14:00:30	4860	1 day, 3:00:00	7	351	4	cod	3	0	0	0	0	0	2	1	0	0	0	0	0	0	0
29/08/2015	14:01:30	4920	1:00:00	7	352	4	cod	8	0	0	0	4	2	1	1	0	0	0	0	0	0	0
29/08/2015	14:02:30	4980	2:00:00	7	352	4	cod	6	0	0	0	2	1	3	0	0	0	0	0	0	0	0
29/08/2015	14:03:30	5040	3:00:00	7	352	4	cod	5	0	0	0	0	0	4	1	0	0	0	0	0	0	0
29/08/2015	14:04:30	5100	4:00:00	7	352	4	cod	3	0	0	3	0	0	0	0	0	0	0	0	0	0	0
29/08/2015	14:05:30	5160	5:00:00	7	352	4	cod	3	1	0	0	0	0	1	1	0	0	0	0	0	0	0
29/08/2015	14:06:30	5220	6:00:00	7	352	4	cod	0	0	0	0	0	0	0	0	0	0	0	0	0	0	0
29/08/2015	14:07:30	5280	7:00:00	7	352	4	cod	3	0	0	0	0	0	2	1	0	0	0	0	0	0	0
29/08/2015	14:08:30	5340	8:00:00	7	352	3	cod	3	0	0	0	1	1	1	0	0	0	0	0	0	0	0
29/08/2015	14:09:30	5400	9:00:00	7	352	3	cod	2	0	0	0	0	0	2	0	0	0	0	0	0	0	0
29/08/2015	14:10:30	5460	10:00:00	7	352	3	cod	2	0	0	2	0	0	0	0	0	0	0	0	0	0	0
29/08/2015	14:11:30	5520	11:00:00	7	352	3	cod	1	0	0	0	1	0	0	0	0	0	0	0	0	0	0
29/08/2015	14:12:30	5580	12:00:00	7	352	3	cod	0	0	0	0	0	0	0	0	0	0	0	0	0	0	0
29/08/2015	14:13:30	5640	13:00:00	7	352	3	cod	2	0	0	0	0	1	1	0	0	0	0	0	0	0	0
29/08/2015	14:14:30	5700	14:00:00	7	352	3	cod	2	0	0	0	0	0	2	0	0	0	0	0	0	0	0
29/08/2015	14:15:30	5760	15:00:00	7	352	4	cod	1	0	0	0	0	0	1	0	0	0	0	0	0	0	0
29/08/2015	14:16:30	5820	16:00:00	7	352	4	cod	1	0	0	0	0	0	1	0	0	0	0	0	0	0	0
29/08/2015	14:17:30	5880	17:00:00	7	352	4	cod	5	0	0	0	2	0	0	3	0	0	0	0	0	0	0	At 16:12 - Cod forces its way through the mesh at the bottom
29/08/2015	14:18:30	5940	18:00:00	7	352	4	cod	0	0	0	0	0	0	0	0	0	0	0	0	0	0	0
29/08/2015	14:19:30	6000	19:00:00	7	352	4	cod	7	0	0	1	3	1	2	0	0	0	0	0	0	0	0
29/08/2015	14:20:30	6060	20:00:00	7	352	4	cod	1	0	0	0	0	1	0	0	0	0	0	0	0	0	0
29/08/2015	14:21:30	6120	21:00:00	7	352	4	cod	3	0	0	1	1	0	1	0	0	0	0	0	0	0	0
29/08/2015	14:22:30	6180	22:00:00	7	352	4	cod	4	0	0	1	0	1	2	0	0	0	0	0	0	0	0
29/08/2015	14:23:30	6240	23:00:00	7	352	4	cod	12	0	0	3	7	0	2	0	0	0	0	0	0	0	0
29/08/2015	14:24:30	6300	1 day, 0:00:00	7	352	4	cod	7	0	0	0	4	1	1	1	0	0	0	0	0	0	0
29/08/2015	14:25:30	6360	1 day, 1:00:00	7	352	4	cod	8	0	0	0	8	0	0	0	0	0	0	0	0	0	0
29/08/2015	14:26:30	6420	1 day, 2:00:00	7	352	4	cod	14	0	2	1	9	0	1	1	0	0	0	0	0	0	0
29/08/2015	14:27:30	6480	1 day, 3:00:00	7	352	4	cod	1	0	0	0	0	0	1	0	0	0	0	0	0	0	0
29/08/2015	14:28:30	6540	1:00:00	7	353	4	cod	0	0	0	0	0	0	0	0	0	0	0	0	0	0	0
29/08/2015	14:29:30	6600	2:00:00	7	353	4	cod	1	0	0	0	1	0	0	0	0	0	0	0	0	0	0
29/08/2015	14:30:30	6660	3:00:00	7	353	4	cod	1	0	0	0	1	0	0	0	0	0	0	0	0	0	0
29/08/2015	14:31:30	6720	4:00:00	7	353	3	cod	1	0	0	0	1	0	0	0	0	0	0	0	0	0	0
29/08/2015	14:32:30	6780	5:00:00	7	353	3	cod	0	0	0	0	0	0	0	0	0	0	0	0	0	0	0
29/08/2015	14:33:30	6840	6:00:00	7	353	3	cod	2	0	0	0	1	0	1	0	0	0	0	0	0	0	0
29/08/2015	14:34:30	6900	7:00:00	7	353	3	cod	0	0	0	0	0	0	0	0	0	0	0	0	0	0	0
29/08/2015	14:35:30	6960	8:00:00	7	353	3	cod	1	0	0	0	0	0	1	0	0	0	0	0	0	0	0
29/08/2015	14:36:30	7020	9:00:00	7	353	2	cod	1	0	0	0	0	0	1	0	0	0	0	0	0	0	0
29/08/2015	14:37:30	7080	10:00:00	7	353	2	cod	0	0	0	0	0	0	0	0	0	0	0	0	0	0	0
29/08/2015	14:38:30	7140	11:00:00	7	353	2	cod	0	0	0	0	0	0	0	0	0	0	0	0	0	0	0
29/08/2015	14:39:30	7200	12:00:00	7	353	2	cod	2	1	0	0	0	0	0	1	0	0	0	0	0	0	0
29/08/2015	14:40:30	7260	13:00:00	7	353	2	cod	1	0	0	0	1	0	0	0	0	0	0	0	0	0	0
29/08/2015	14:41:30	7320	14:00:00	7	353	2	cod	1	0	0	0	1	0	0	0	0	0	0	0	0	0	0
29/08/2015	14:42:30	7380	15:00:00	7	353	3	cod	3	0	0	0	2	0	1	0	0	0	0	0	0	0	0
29/08/2015	14:43:30	7440	16:00:00	7	353	3	cod	3	1	0	0	0	0	1	1	0	0	0	0	0	0	0
29/08/2015	14:44:30	7500	17:00:00	7	353	3	cod	2	0	0	1	1	0	0	0	0	0	0	0	0	0	0
29/08/2015	14:45:30	7560	18:00:00	7	353	3	cod	4	0	0	1	2	1	0	0	0	0	0	0	0	0	0
29/08/2015	14:46:30	7620	19:00:00	7	353	3	cod	2	0	0	0	1	1	0	0	0	0	0	0	0	0	0
29/08/2015	14:47:30	7680	20:00:00	7	353	3	cod	10	1	0	1	6	0	1	1	0	0	0	0	0	0	0
29/08/2015	14:48:30	7740	21:00:00	7	353	3	cod	6	0	0	0	3	0	3	0	0	0	0	0	0	0	0
29/08/2015	14:49:30	7800	22:00:00	7	353	3	cod	13	0	0	1	7	3	1	1	0	0	0	0	0	0	0
29/08/2015	14:50:30	7860	23:00:00	7	353	3	cod	8	0	1	1	2	4	0	0	0	0	0	0	0	0	0
29/08/2015	14:51:30	7920	1 day, 0:00:00	7	353	3	cod	13	0	2	0	4	5	2	0	0	0	0	0	0	0	0
29/08/2015	14:52:30	7980	1 day, 1:00:00	7	353	3	cod	7	0	0	1	2	2	2	0	0	0	0	0	0	0	0
29/08/2015	14:53:30	8040	1 day, 2:00:00	7	353	3	cod	8	0	0	1	2	1	2	1	1	0	0	0	0	0	0
29/08/2015	14:54:30	8100	1 day, 3:00:00	7	353	3	cod	7	0	0	2	2	0	3	0	0	0	0	0	0	0	0
29/08/2015	14:55:30	8160	1:00:00	7	354	4	cod	12	0	0	1	5	1	5	0	0	0	0	0	0	0	0
29/08/2015	14:56:30	8220	2:00:00	7	354	4	cod	9	0	1	2	2	2	2	0	0	0	0	0	0	0	0
29/08/2015	14:57:30	8280	3:00:00	7	354	4	cod	14	0	0	3	6	3	2	0	0	0	0	0	0	0	0
29/08/2015	14:58:30	8340	4:00:00	7	354	4	cod	5	0	0	1	0	1	3	0	0	0	0	0	0	0	0
29/08/2015	14:59:30	8400	5:00:00	7	354	4	cod	11	0	0	1	3	2	2	3	0	0	0	0	0	0	0
29/08/2015	15:00:30	8460	6:00:00	7	354	4	cod	13	0	1	0	2	1	6	3	0	0	0	0	0	0	0
29/08/2015	15:01:30	8520	7:00:00	7	354	4	cod	3	0	0	0	0	0	3	0	0	0	0	0	0	0	0
29/08/2015	15:02:30	8580	8:00:00	7	354	3	cod	10	0	0	0	1	0	6	3	0	0	0	0	0	0	0
29/08/2015	15:03:30	8640	9:00:00	7	354	3	cod	4	0	0	0	1	1	1	1	0	0	0	0	0	0	0
29/08/2015	15:04:30	8700	10:00:00	7	354	3	cod	6	0	1	1	1	0	1	2	0	0	0	0	0	0	0
29/08/2015	15:05:30	8760	11:00:00	7	354	3	cod	5	0	1	0	0	1	2	1	0	0	0	0	0	0	0
29/08/2015	15:06:30	8820	12:00:00	7	354	3	cod	5	1	0	0	0	0	4	0	0	0	0	0	0	0	0
29/08/2015	15:07:30	8880	13:00:00	7	354	3	cod	4	0	0	2	1	0	1	0	0	0	0	0	0	0	0
29/08/2015	15:08:30	8940	14:00:00	7	354	3	cod	3	0	1	1	0	0	1	0	0	0	0	0	0	0	0
29/08/2015	15:09:30	9000	15:00:00	7	354	3	cod	3	0	0	0	0	0	2	1	0	0	0	0	0	0	0
29/08/2015	15:10:30	9060	16:00:00	7	354	3	cod	0	0	0	0	0	0	0	0	0	0	0	0	0	0	0
29/08/2015	15:11:30	9120	17:00:00	7	354	3	cod	1	0	0	0	1	0	0	0	0	0	0	0	0	0	0
29/08/2015	15:12:30	9180	18:00:00	7	354	3	cod	4	0	0	0	1	1	2	0	0	0	0	0	0	0	0
29/08/2015	15:13:30	9240	19:00:00	7	354	3	cod	1	0	0	0	1	0	0	0	0	0	0	0	0	0	0
29/08/2015	15:14:30	9300	20:00:00	7	354	3	cod	1	0	0	0	1	0	0	0	0	0	0	0	0	0	0
29/08/2015	15:15:30	9360	21:00:00	7	354	3	cod	3	0	0	0	2	1	0	0	0	0	0	0	0	0	0
29/08/2015	15:16:30	9420	22:00:00	7	354	3	cod	9	2	0	2	4	0	1	0	0	0	0	0	0	0	0
29/08/2015	15:17:30	9480	23:00:00	7	354	3	cod	3	0	1	0	1	0	0	1	0	0	0	0	0	0	0
29/08/2015	15:18:30	9540	1 day, 0:00:00	7	354	3	cod	8	0	1	1	3	3	0	0	0	0	0	0	0	0	0
29/08/2015	15:19:30	9600	1 day, 1:00:00	7	354	3	cod	4	0	0	1	1	2	0	0	0	0	0	0	0	0	0
29/08/2015	15:20:30	9660	1 day, 2:00:00	7	354	3	cod	1	0	0	0	0	0	1	0	0	0	0	0	0	0	0
29/08/2015	15:21:30	9720	1:00:00	7	355	3	cod	3	0	1	0	2	0	0	0	0	0	0	0	0	0	0
29/08/2015	15:22:30	9780	2:00:00	7	355	3	cod	5	0	0	0	1	0	2	1	1	0	0	0	0	0	0
29/08/2015	15:23:30	9840	3:00:00	7	355	4	cod	3	1	0	0	0	0	2	0	0	0	0	0	0	0	0
29/08/2015	15:24:30	9900	4:00:00	7	355	4	cod	6	0	0	0	5	1	0	0	0	0	0	0	0	0	0
29/08/2015	15:25:30	9960	5:00:00	7	355	4	cod	2	0	0	0	0	2	0	0	0	0	0	0	0	0	0
29/08/2015	15:26:30	10020	6:00:00	7	355	4	cod	3	0	0	0	3	0	0	0	0	0	0	0	0	0	0
29/08/2015	15:27:30	10080	7:00:00	7	355	4	cod	6	0	0	0	5	1	0	0	0	0	0	0	0	0	0
29/08/2015	15:28:30	10140	8:00:00	7	355	4	cod	2	0	0	0	2	0	0	0	0	0	0	0	0	0	0
29/08/2015	15:29:30	10200	9:00:00	7	355	4	cod	9	0	0	0	8	1	0	0	0	0	0	0	0	0	0
29/08/2015	15:30:30	10260	10:00:00	7	355	4	cod	1	0	0	0	1	0	0	0	0	0	0	0	0	0	0
29/08/2015	15:31:30	10320	11:00:00	7	355	2	cod	2	0	0	0	2	0	0	0	0	0	0	0	0	0	0
29/08/2015	15:32:30	10380	12:00:00	7	355	2	cod	4	0	0	1	3	0	0	0	0	0	0	0	0	0	0
29/08/2015	15:33:30	10440	13:00:00	7	355	2	cod	0	0	0	0	0	0	0	0	0	0	0	0	0	0	0
29/08/2015	15:34:30	10500	14:00:00	7	355	2	cod	0	0	0	0	0	0	0	0	0	0	0	0	0	0	0
29/08/2015	15:35:30	10560	15:00:00	7	355	2	cod	0	0	0	0	0	0	0	0	0	0	0	0	0	0	0
29/08/2015	15:36:30	10620	16:00:00	7	355	2	cod	0	0	0	0	0	0	0	0	0	0	0	0	0	0	0
29/08/2015	15:37:30	10680	17:00:00	7	355	2	cod	1	0	0	1	0	0	0	0	0	0	0	0	0	0	0
29/08/2015	15:38:30	10740	18:00:00	7	355	2	cod	0	0	0	0	0	0	0	0	0	0	0	0	0	0	0
29/08/2015	15:39:30	10800	19:00:00	7	355	2	cod	0	0	0	0	0	0	0	0	0	0	0	0	0	0	0
29/08/2015	15:40:30	10860	20:00:00	7	355	2	cod	2	0	0	1	0	0	1	0	0	0	0	0	0	0	0
29/08/2015	15:41:30	10920	21:00:00	7	355	4	cod	4	0	0	0	1	0	2	1	0	0	0	0	0	0	0
29/08/2015	15:42:30	10980	22:00:00	7	355	4	cod	3	0	0	0	1	1	1	0	0	0	0	0	0	0	0
29/08/2015	15:43:30	11040	23:00:00	7	355	4	cod	1	0	0	0	1	0	0	0	0	0	0	0	0	0	0
29/08/2015	15:44:30	11100	1 day, 0:00:00	7	355	4	cod	0	0	0	0	0	0	0	0	0	0	0	0	0	0	0
29/08/2015	15:45:30	11160	1 day, 1:00:00	7	355	4	cod	4	0	0	1	3	0	0	0	0	0	0	0	0	0	0
29/08/2015	15:46:30	11220	1 day, 2:00:00	7	355	3	cod	4	0	0	2	2	0	0	0	0	0	0	0	0	0	0
29/08/2015	15:47:30	11280	1 day, 3:00:00	7	355	3	cod	1	0	0	1	0	0	0	0	0	0	0	0	0	0	0
29/08/2015	15:48:30	11340	1 day, 4:00:00	7	355	3	cod	0	0	0	0	0	0	0	0	0	0	0	0	0	0	0
29/08/2015	15:49:30	11400	1:00:00	7	356	3	cod	2	0	0	0	2	0	0	0	0	0	0	0	0	0	0
29/08/2015	15:50:30	11460	2:00:00	7	356	3	cod	1	0	0	1	0	0	0	0	0	0	0	0	0	0	0
29/08/2015	15:51:30	11520	3:00:00	7	356	3	cod	0	0	0	0	0	0	0	0	0	0	0	0	0	0	0
29/08/2015	15:52:30	11580	4:00:00	7	356	3	cod	4	0	0	2	2	0	0	0	0	0	0	0	0	0	0
29/08/2015	15:53:30	11640	5:00:00	7	356	3	cod	6	0	0	2	4	0	0	0	0	0	0	0	0	0	0
29/08/2015	15:54:30	11700	6:00:00	7	356	3	cod	2	0	0	0	2	0	0	0	0	0	0	0	0	0	0
29/08/2015	15:55:30	11760	7:00:00	7	356	3	cod	3	0	0	0	3	0	0	0	0	0	0	0	0	0	0
29/08/2015	15:56:30	11820	8:00:00	7	356	3	cod	0	0	0	0	0	0	0	0	0	0	0	0	0	0	0
29/08/2015	15:57:30	11880	9:00:00	7	356	3	cod	0	0	0	0	0	0	0	0	0	0	0	0	0	0	0
29/08/2015	15:58:30	11940	10:00:00	7	356	3	cod	0	0	0	0	0	0	0	0	0	0	0	0	0	0	0
29/08/2015	15:59:30	12000	11:00:00	7	356	3	cod	0	0	0	0	0	0	0	0	0	0	0	0	0	0	0
29/08/2015	16:00:30	12060	12:00:00	7	356	3	cod	1	0	0	0	1	0	0	0	0	0	0	0	0	0	0
29/08/2015	16:01:30	12120	13:00:00	7	356	3	cod	1	0	0	1	0	0	0	0	0	0	0	0	0	0	0
29/08/2015	16:02:30	12180	14:00:00	7	356	3	cod	1	0	0	0	1	0	0	0	0	0	0	0	0	0	0
29/08/2015	16:03:30	12240	15:00:00	7	356	3	cod	0	0	0	0	0	0	0	0	0	0	0	0	0	0	0
29/08/2015	16:04:30	12300	16:00:00	7	356	3	cod	0	0	0	0	0	0	0	0	0	0	0	0	0	0	0
29/08/2015	16:05:30	12360	17:00:00	7	356	3	cod	1	0	0	1	0	0	0	0	0	0	0	0	0	0	0
29/08/2015	16:06:30	12420	18:00:00	7	356	3	cod	2	0	0	0	0	0	2	0	0	0	0	0	0	0	0
29/08/2015	16:07:30	12480	19:00:00	7	356	3	cod	0	0	0	0	0	0	0	0	0	0	0	0	0	0	0
29/08/2015	16:08:30	12540	20:00:00	7	356	3	cod	0	0	0	0	0	0	0	0	0	0	0	0	0	0	0
29/08/2015	16:09:30	12600	21:00:00	7	356	3	cod	2	0	0	1	1	0	0	0	0	0	0	0	0	0	0
29/08/2015	16:10:30	12660	22:00:00	7	356	3	cod	1	0	0	0	1	0	0	0	0	0	0	0	0	0	0
29/08/2015	16:11:30	12720	23:00:00	7	356	3	cod	0	0	0	0	0	0	0	0	0	0	0	0	0	0	0
29/08/2015	16:12:30	12780	1 day, 0:00:00	7	356	3	cod	0	0	0	0	0	0	0	0	0	0	0	0	0	0	0
29/08/2015	16:13:30	12840	1 day, 1:00:00	7	356	3	cod	0	0	0	0	0	0	0	0	0	0	0	0	0	0	0
29/08/2015	16:14:30	12900	1 day, 2:00:00	7	356	3	cod	1	0	0	1	0	0	0	0	0	0	0	0	0	0	0
29/08/2015	16:15:30	12960	1 day, 3:00:00	7	356	3	cod	1	0	0	0	0	0	1	0	0	0	0	0	0	0	0
29/08/2015	16:16:30	13020	1 day, 4:00:00	7	356	3	cod	0	0	0	0	0	0	0	0	0	0	0	0	0	0	0
29/08/2015	16:17:30	13080	1 day, 5:00:00	7	356	3	cod	0	0	0	0	0	0	0	0	0	0	0	0	0	0	0
29/08/2015	16:18:30	13140	1:00:00	7	357	3	cod	0	0	0	0	0	0	0	0	0	0	0	0	0	0	0
29/08/2015	16:19:30	13200	2:00:00	7	357	3	cod	0	0	0	0	0	0	0	0	0	0	0	0	0	0	0
29/08/2015	16:20:30	13260	3:00:00	7	357	3	cod	0	0	0	0	0	0	0	0	0	0	0	0	0	0	0
29/08/2015	16:21:30	13320	4:00:00	7	357	3	cod	2	0	0	2	0	0	0	0	0	0	0	0	0	0	0
29/08/2015	16:22:30	13380	5:00:00	7	357	3	cod	0	0	0	0	0	0	0	0	0	0	0	0	0	0	0
29/08/2015	16:23:30	13440	6:00:00	7	357	3	cod	0	0	0	0	0	0	0	0	0	0	0	0	0	0	0
29/08/2015	16:24:30	13500	7:00:00	7	357	3	cod	0	0	0	0	0	0	0	0	0	0	0	0	0	0	0
29/08/2015	16:25:30	13560	8:00:00	7	357	3	cod	0	0	0	0	0	0	0	0	0	0	0	0	0	0	0
29/08/2015	16:26:30	13620	9:00:00	7	357	3	cod	0	0	0	0	0	0	0	0	0	0	0	0	0	0	0
29/08/2015	16:27:30	13680	10:00:00	7	357	3	cod	0	0	0	0	0	0	0	0	0	0	0	0	0	0	0
29/08/2015	16:28:30	13740	11:00:00	7	357	3	cod	1	0	0	0	1	0	0	0	0	0	0	0	0	0	0
29/08/2015	16:29:30	13800	12:00:00	7	357	3	cod	0	0	0	0	0	0	0	0	0	0	0	0	0	0	0
29/08/2015	16:30:30	13860	13:00:00	7	357	3	cod	0	0	0	0	0	0	0	0	0	0	0	0	0	0	0
29/08/2015	16:31:30	13920	14:00:00	7	357	3	cod	0	0	0	0	0	0	0	0	0	0	0	0	0	0	0
29/08/2015	16:32:30	13980	15:00:00	7	357	3	cod	0	0	0	0	0	0	0	0	0	0	0	0	0	0	0
29/08/2015	16:33:30	14040	16:00:00	7	357	3	cod	1	0	0	0	0	0	0	1	0	0	0	0	0	0	0
29/08/2015	16:34:30	14100	17:00:00	7	357	3	cod	2	0	0	0	1	0	1	0	0	0	0	0	0	0	0
29/08/2015	16:35:30	14160	18:00:00	7	357	3	cod	0	0	0	0	0	0	0	0	0	0	0	0	0	0	0
29/08/2015	16:36:30	14220	19:00:00	7	357	3	cod	0	0	0	0	0	0	0	0	0	0	0	0	0	0	0
29/08/2015	16:37:30	14280	20:00:00	7	357	3	cod	0	0	0	0	0	0	0	0	0	0	0	0	0	0	0
29/08/2015	16:38:30	14340	21:00:00	7	357	3	cod	0	0	0	0	0	0	0	0	0	0	0	0	0	0	0
29/08/2015	16:39:30	14400	22:00:00	7	357	3	cod	0	0	0	0	0	0	0	0	0	0	0	0	0	0	0
29/08/2015	16:40:30	14460	23:00:00	7	357	3	cod	0	0	0	0	0	0	0	0	0	0	0	0	0	0	0
29/08/2015	16:41:30	14520	1 day, 0:00:00	7	357	3	cod	4	0	1	2	1	0	0	0	0	0	0	0	0	0	0
29/08/2015	16:42:30	14580	1 day, 1:00:00	7	357	3	cod	1	0	0	0	1	0	0	0	0	0	0	0	0	0	0
29/08/2015	16:43:30	14640	1 day, 2:00:00	7	357	3	cod	0	0	0	0	0	0	0	0	0	0	0	0	0	0	0
29/08/2015	16:44:30	14700	1 day, 3:00:00	7	357	3	cod	0	0	0	0	0	0	0	0	0	0	0	0	0	0	0
29/08/2015	16:45:30	14760	1 day, 4:00:00	7	357	3	cod	2	0	0	1	0	0	1	0	0	0	0	0	0	0	0
29/08/2015	16:46:30	14820	1 day, 5:00:00	7	357	3	cod	1	0	0	0	1	0	0	0	0	0	0	0	0	0	0
29/08/2015	16:47:30	14880	1 day, 6:00:00	7	357	3	cod	0	0	0	0	0	0	0	0	0	0	0	0	0	0	0
29/08/2015	16:48:30	14940	1:00:00	7	358	3	cod	0	0	0	0	0	0	0	0	0	0	0	0	0	0	0
29/08/2015	16:49:30	15000	2:00:00	7	358	3	cod	0	0	0	0	0	0	0	0	0	0	0	0	0	0	0
29/08/2015	16:50:30	15060	3:00:00	7	358	3	cod	0	0	0	0	0	0	0	0	0	0	0	0	0	0	0
29/08/2015	16:51:30	15120	4:00:00	7	358	3	cod	0	0	0	0	0	0	0	0	0	0	0	0	0	0	0
29/08/2015	16:52:30	15180	5:00:00	7	358	3	cod	0	0	0	0	0	0	0	0	0	0	0	0	0	0	0
29/08/2015	16:53:30	15240	6:00:00	7	358	3	cod	4	0	0	0	2	1	1	0	0	0	0	0	0	0	0
29/08/2015	16:54:30	15300	7:00:00	7	358	3	cod	1	0	0	1	0	0	0	0	0	0	0	0	0	0	0
29/08/2015	16:55:30	15360	8:00:00	7	358	3	cod	0	0	0	0	0	0	0	0	0	0	0	0	0	0	0
29/08/2015	16:56:30	15420	9:00:00	7	358	3	cod	1	0	0	0	1	0	0	0	0	0	0	0	0	0	0
29/08/2015	16:57:30	15480	10:00:00	7	358	4	cod	0	0	0	0	0	0	0	0	0	0	0	0	0	0	0
29/08/2015	16:58:30	15540	11:00:00	7	358	4	cod	0	0	0	0	0	0	0	0	0	0	0	0	0	0	0
29/08/2015	16:59:30	15600	12:00:00	7	358	4	cod	0	0	0	0	0	0	0	0	0	0	0	0	0	0	0
29/08/2015	17:00:30	15660	13:00:00	7	358	4	cod	1	0	0	0	0	0	1	0	0	0	0	0	0	0	0
29/08/2015	17:01:30	15720	14:00:00	7	358	4	cod	0	0	0	0	0	0	0	0	0	0	0	0	0	0	0
29/08/2015	17:02:30	15780	15:00:00	7	358	4	cod	2	0	0	0	1	0	1	0	0	0	0	0	0	0	0
29/08/2015	17:03:30	15840	16:00:00	7	358	4	cod	3	0	0	0	2	1	0	0	0	0	0	0	0	0	0
29/08/2015	17:04:30	15900	17:00:00	7	358	4	cod	2	0	0	0	2	0	0	0	0	0	0	0	0	0	0
29/08/2015	17:05:30	15960	18:00:00	7	358	4	cod	0	0	0	0	0	0	0	0	0	0	0	0	0	0	0
29/08/2015	17:06:30	16020	19:00:00	7	358	4	cod	0	0	0	0	0	0	0	0	0	0	0	0	0	0	0
29/08/2015	17:07:30	16080	20:00:00	7	358	4	cod	0	0	0	0	0	0	0	0	0	0	0	0	0	0	0
29/08/2015	17:08:30	16140	21:00:00	7	358	4	cod	0	0	0	0	0	0	0	0	0	0	0	0	0	0	0
29/08/2015	17:09:30	16200	22:00:00	7	358	4	cod	0	0	0	0	0	0	0	0	0	0	0	0	0	0	0
29/08/2015	17:10:30	16260	23:00:00	7	358	4	cod	0	0	0	0	0	0	0	0	0	0	0	0	0	0	0
29/08/2015	17:11:30	16320	1 day, 0:00:00	7	358	4	cod	0	0	0	0	0	0	0	0	0	0	0	0	0	0	0
29/08/2015	17:12:30	16380	1 day, 1:00:00	7	358	4	cod	0	0	0	0	0	0	0	0	0	0	0	0	0	0	0
29/08/2015	17:13:30	16440	1 day, 2:00:00	7	358	4	cod	0	0	0	0	0	0	0	0	0	0	0	0	0	0	0
29/08/2015	17:14:30	16500	1 day, 3:00:00	7	358	4	cod	1	0	0	0	0	0	0	1	0	0	0	0	0	0	0
29/08/2015	17:15:30	16560	1 day, 4:00:00	7	358	4	cod	3	0	0	0	0	0	0	1	2	0	0	0	0	0	0
29/08/2015	17:16:30	16620	1 day, 5:00:00	7	358	4	cod	1	0	0	0	0	0	0	1	0	0	0	0	0	0	0
29/08/2015	17:17:30	16680	1 day, 6:00:00	7	358	4	cod	0	0	0	0	0	0	0	0	0	0	0	0	0	0	0
29/08/2015	17:18:30	16740	1:00:00	7	359	4	cod	0	0	0	0	0	0	0	0	0	0	0	0	0	0	0	Water direction hard to determine, varied greatly, constanly changing, but seemed to go towards 4, probably tide switching
29/08/2015	17:19:30	16800	2:00:00	7	359	4	cod	0	0	0	0	0	0	0	0	0	0	0	0	0	0	0
29/08/2015	17:20:30	16860	3:00:00	7	359	4	cod	1	0	0	0	0	0	1	0	0	0	0	0	0	0	0
29/08/2015	17:21:30	16920	4:00:00	7	359	4	cod	2	0	0	0	0	0	0	1	1	0	0	0	0	0	0
29/08/2015	17:22:30	16980	5:00:00	7	359	4	cod	0	0	0	0	0	0	0	0	0	0	0	0	0	0	0
29/08/2015	17:23:30	17040	6:00:00	7	359	4	cod	0	0	0	0	0	0	0	0	0	0	0	0	0	0	0
29/08/2015	17:24:30	17100	7:00:00	7	359	4	cod	0	0	0	0	0	0	0	0	0	0	0	0	0	0	0
29/08/2015	17:25:30	17160	8:00:00	7	359	4	cod	0	0	0	0	0	0	0	0	0	0	0	0	0	0	0
29/08/2015	17:26:30	17220	9:00:00	7	359	4	cod	3	0	0	1	2	0	0	0	0	0	0	0	0	0	0
29/08/2015	17:27:30	17280	10:00:00	7	359	4	cod	0	0	0	0	0	0	0	0	0	0	0	0	0	0	0
29/08/2015	17:28:30	17340	11:00:00	7	359	4	cod	0	0	0	0	0	0	0	0	0	0	0	0	0	0	0
29/08/2015	17:29:30	17400	12:00:00	7	359	4	cod	3	0	0	0	0	0	2	0	1	0	0	0	0	0	0
29/08/2015	17:30:30	17460	13:00:00	7	359	4	cod	2	0	0	0	2	0	0	0	0	0	0	0	0	0	0
29/08/2015	17:31:30	17520	14:00:00	7	359	4	cod	1	0	1	0	0	0	0	0	0	0	0	0	0	0	0
29/08/2015	17:32:30	17580	15:00:00	7	359	4	cod	0	0	0	0	0	0	0	0	0	0	0	0	0	0	0
29/08/2015	17:33:30	17640	16:00:00	7	359	4	cod	2	0	0	1	0	0	1	0	0	0	0	0	0	0	0
29/08/2015	17:34:30	17700	17:00:00	7	359	4	cod	0	0	0	0	0	0	0	0	0	0	0	0	0	0	0
29/08/2015	17:35:30	17760	18:00:00	7	359	4	cod	1	0	0	0	0	0	1	0	0	0	0	0	0	0	0
29/08/2015	17:36:30	17820	19:00:00	7	359	4	cod	2	0	0	0	1	0	1	0	0	0	0	0	0	0	0
29/08/2015	17:37:30	17880	20:00:00	7	359	4	cod	2	0	0	0	1	0	1	0	0	0	0	0	0	0	0
29/08/2015	17:38:30	17940	21:00:00	7	359	4	cod	2	0	0	0	1	0	1	0	0	0	0	0	0	0	0
29/08/2015	17:39:30	18000	22:00:00	7	359	4	cod	1	0	0	0	0	0	1	0	0	0	0	0	0	0	0
29/08/2015	17:40:30	18060	23:00:00	7	359	4	cod	0	0	0	0	0	0	0	0	0	0	0	0	0	0	0
29/08/2015	17:41:30	18120	1 day, 0:00:00	7	359	4	cod	0	0	0	0	0	0	0	0	0	0	0	0	0	0	0
29/08/2015	17:42:30	18180	1 day, 1:00:00	7	359	4	cod	0	0	0	0	0	0	0	0	0	0	0	0	0	0	0	Something bumps camera at 24:50ish
29/08/2015	17:43:30	18240	1 day, 2:00:00	7	359	4	cod	0	0	0	0	0	0	0	0	0	0	0	0	0	0	0
[truncated: 3,399 more rows]

## Sheet: Video Metadata
Variable			Description				Possible Values (If left blank it should be obvious)
date			Date of pot deployment
time			Real time of pot deployment
elapsed			Elapsed time (in seconds) of cod pot deployment
counter			Elapsed time of video recording
campotid			The speicific cod pot deployment
file			The exact video file
waterdir			Water direction				Values from 1 to 8 depending on direction of current during that minute of video, or combinations of numbers 1 to 8 (e.g. 28) for multiple current directions
species			Species observed
approach			The number of times a species entered the observable field of view for the video recording during that one minute of video
1			The number of approaches from direction 1
2			The number of approaches from direction 2
3			The number of approaches from direction 3
4			The number of approaches from direction 4
5			The number of approaches from direction 5
6			The number of approaches from direction 6
7			The number of approaches from direction 7
8			The number of approaches from direction 8
attempt			The number of times a species attempted to enter the cod pot during that one minute of video
L/U			The number of attempted entrances from the Left (or Up) facing entrance
R/D			The number of attempted entrances from the Right (or Down) facing entrance
success			The number of individuals that successfully completed an entrance attempt into the pot
fail			The number of individuals that failed an entrance attempt
exit			The number of previously caught individuals that escaped
